# Supplementary material for: Widespread and strong impacts of river fragmentation by human barriers on fishes in the Mekong River Basin
Source: Research Square preprint supplement (doi:10.21203/rs.3.rs-5894851/v1), 2025-03-05
Supplement: Supplementary file 1 [file 72f46a22128b2c8da6811460.xlsx]

## Sheet: Sheet1
species_name	distance	dispersal_prob	subbasin_num	habi_len	pci_1	pci_0.5	pci_1*100	pci_0.5*100	FI	pci_0.5remove	pci_0.1	pci_0.1*100	barrier_num	pci_remove*100	fi_aver
Aaptosyax_grypus	612638	0.9	122	4413.02	0.0651802	0.043826	6.51802	4.3826	32.7618	0.0452807	0.0408495	4.08495	99	4.52807	0.330927
Acanthopagrus_berda	50898.6	0.8	7	617	0.22997	0.180003	22.997	18.0003	21.7276	0.180003	0.159683	15.9683	19	18.0003	1.14356
Acanthopsoides_delphax	2374.49	0.4	556	25203.6	0.00269845	0.00235044	0.269845	0.235044	12.8966	0.00238374	0.002301	0.2301	1107	0.238374	0.0116501
Acanthopsoides_gracilentus	2123.9	0.4	452	18922.5	0.00343554	0.00279311	0.343554	0.279311	18.6996	0.00283436	0.00274193	0.274193	1430	0.283436	0.0130767
Acanthopsoides_gracilis	1954.64	0.4	539	23875.2	0.0027873	0.00233365	0.27873	0.233365	16.2753	0.00236078	0.00229339	0.229339	1606	0.236078	0.0101341
Acanthopsoides_hapalias	1952.15	0.4	588	25406	0.00256126	0.00212472	0.256126	0.212472	17.0439	0.00215161	0.00208791	0.208791	1698	0.215161	0.0100376
Acanthopsoides_molobrion	915.33	0.3	138	4991.71	0.0103207	0.00840712	1.03207	0.840712	18.5413	0.00843526	0.00822875	0.822875	867	0.843526	0.0213856
Acantopsis_bruinen	840.759	0.3	11	445.57	0.106633	0.105164	10.6633	10.5164	1.37739	0.105164	0.105164	10.5164	10	10.5164	0.137739
Acantopsis_dialuzona	24209.2	0.7	673	28533	0.00429808	0.00266519	0.429808	0.266519	37.9912	0.00276945	0.00253727	0.253727	1626	0.276945	0.0233648
Acantopsis_dinema	1788.61	0.4	1	62.42	1	1	100	100	0	1	1		0		0
Acantopsis_ioa	9566.31	0.6	5	106.74	0.421305	0.216588	42.1305	21.6588	48.5912	0.421305	0.216588	21.6588	2	42.1305	24.2956
Acantopsis_spectabilis	23440.2	0.7	148	5579.01	0.0181932	0.0145527	1.81932	1.45527	20.0101	0.0147769	0.0141032	1.41032	169	1.47769	0.118403
Acantopsis_thiemmedhi	7831.71	0.6	1	98.13	1	1	100	100	0	1	1		2		0
Acentrogobius_caninus	4016.42	0.5	12	929.31	0.0914918	0.0863919	9.14918	8.63919	5.57423	0.0863919	0.0841836	8.41836	23	8.63919	0.242358
Acentrogobius_viridipunctatus	3740.12	0.5	8	727.35	0.128456	0.127678	12.8456	12.7678	0.605942	0.127678	0.126639	12.6639	7	12.7678	0.0865632
Acheilognathus_barbatulus	4004.12	0.5	49	2344.64	0.0303374	0.0248495	3.03374	2.48495	18.0895	0.0272236	0.0242205	2.42205	151	2.72236	0.119798
Acheilognathus_deignani	4510.61	0.5	70	2788.46	0.0234283	0.0179659	2.34283	1.79659	23.3153	0.0203709	0.0177382	1.77382	128	2.03709	0.182151
Achiroides_leucorhynchos	3167.89	0.5	20	507.58	0.086773	0.0760903	8.6773	7.60903	12.3111	0.0800834	0.0714978	7.14978	15	8.00834	0.820743
Achiroides_melanorhynchus	14085.2	0.7	94	4776.18	0.0240509	0.0213776	2.40509	2.13776	11.1153	0.0216746	0.0207576	2.07576	88	2.16746	0.126311
Acrossocheilus_aluoiensis	74802.8	0.8	3	169.87	0.615909	0.333333	61.5909	33.3333	45.8795	0.333333	0.333333	33.3333	4	33.3333	11.4699
Acrossocheilus_iridescens	70808.1	0.8	4	289.32	0.465806	0.463484	46.5806	46.3484	0.498437	0.463484	0.463484	46.3484	6	46.3484	0.0830729
Acrossocheilus_xamensis	30953.7	0.8	12	352.16	0.27215	0.182201	27.215	18.2201	33.0513	0.182201	0.13896	13.896	11	18.2201	3.00466
Ageneiogarra_imberba	3311.37	0.5	81	4144.7	0.0179991	0.0136596	1.79991	1.36596	24.1092	0.0159889	0.0134547	1.34547	385	1.59889	0.0626213
Ageneiogarra_theunensis	1740.74	0.4	30	1402.09	0.0415298	0.0376351	4.15298	3.76351	9.37795	0.0409812	0.0375065	3.75065	40	4.09812	0.234449
Akysis_bilustris	641.053	0.3	9	290.37	0.157473	0.157441	15.7473	15.7441	0.020266	0.157441	0.157441	15.7441	4	15.7441	0.00506649
Akysis_brachybarbatus	607.882	0.3	17	915.86	0.0657612	0.0612321	6.57612	6.12321	6.88716	0.0654666	0.0611395	6.11395	57	6.54666	0.120827
Akysis_ephippifer	1797.74	0.4	56	2890.47	0.0224038	0.021559	2.24038	2.1559	3.77046	0.021675	0.0213661	2.13661	59	2.1675	0.0639062
Akysis_fuliginatus	1268.93	0.4	47	2013.39	0.0297148	0.0282181	2.97148	2.82181	5.03692	0.0283829	0.0281023	2.81023	28	2.83829	0.17989
Akysis_variegatus	720.986	0.3	1	24.77	1	1	100	100	0	1	1		3		-1.03145e-07
Akysis_varius	934.129	0.3	148	5391.36	0.00951624	0.007856	0.951624	0.7856	17.4465	0.00789898	0.00771344	0.771344	675	0.789898	0.0258466
Albulichthys_albuloides	42483.3	0.8	627	26453.1	0.00744292	0.00367353	0.744292	0.367353	50.6439	0.00389395	0.00342446	0.342446	1503	0.389395	0.0336952
Allenbatrachus_grunniens	6072.34	0.6	7	580.97	0.174104	0.152279	17.4104	15.2279	12.5359	0.152279	0.144375	14.4375	22	15.2279	0.569815
Allenbatrachus_reticulatus	7505.66	0.6	1	331.41	1	1	100	100	0	1	1		5		1.14215e-07
Altigena_elegans	1336.56	0.4	47	1703.29	0.0312896	0.0266658	3.12896	2.66658	14.7776	0.0271165	0.0262912	2.62912	75	2.71165	0.197035
Altigena_laticeps	2705.52	0.5	6	229.36	0.191659	0.184925	19.1659	18.4925	3.51382	0.184925	0.183525	18.3525	4	18.4925	0.878454
Altigena_lippa	2006.83	0.4	135	5554.81	0.0105622	0.00921677	1.05622	0.921677	12.7383	0.00989461	0.00910571	0.910571	301	0.989461	0.0423198
Altigena_tonkinensis	931.989	0.3	20	805.42	0.0672481	0.0528001	6.72481	5.28001	21.4846	0.0640686	0.0512653	5.12653	32	6.40686	0.671393
Altigena_yunnanensis	3602.61	0.5	845	35239.9	0.00208961	0.00157103	0.208961	0.157104	24.8169	0.00162367	0.00153238	0.153238	2602	0.162367	0.00953763
Altigena_zhui	2482.13	0.4	9	561.34	0.129103	0.111333	12.9103	11.1333	13.7643	0.127674	0.111333	11.1333	41	12.7674	0.335714
Ambassis_gymnocephalus	15843.1	0.7	97	4781.46	0.0257559	0.021324	2.57559	2.1324	17.207	0.0223572	0.020493	2.0493	117	2.23572	0.147068
Ambassis_urotaenia	3250.8	0.5	24	1810.12	0.0496863	0.0462192	4.96863	4.62192	6.97804	0.0462192	0.044169	4.4169	45	4.62192	0.155068
Ambassis_vachellii	2493.51	0.5	9	983.54	0.11194	0.111649	11.194	11.1649	0.259803	0.111649	0.111535	11.1535	23	11.1649	0.0112958
Ambastaia_nigrolineata	4063.4	0.5	97	4746.96	0.0154357	0.0132455	1.54357	1.32455	14.1894	0.0135708	0.0127972	1.27972	220	1.35708	0.0644971
Ambastaia_sidthimunki	1000.45	0.3	9	308.76	0.138692	0.138692	13.8692	13.8692	1.45351e-08	0.138692	0.138692	13.8692	11	13.8692	1.32137e-09
Amblyceps_caecutiens	7060.84	0.6	106	3951.26	0.0218963	0.0161548	2.18963	1.61548	26.2215	0.0167874	0.0153437	1.53438	244	1.67874	0.107465
Amblyceps_foratum	2259.32	0.4	1	77.12	1	1	100	100	0	1	1		19		-8.24084e-08
Amblyceps_serratum	4662.78	0.5	179	8664.05	0.00926929	0.00806986	0.926929	0.806986	12.9399	0.00811619	0.00790797	0.790798	336	0.811619	0.0385116
Amblypharyngodon_chulabhornae	3702.59	0.5	451	18142.4	0.00391643	0.0030147	0.391643	0.30147	23.0242	0.00307704	0.00294872	0.294872	1071	0.307704	0.0214979
Amblyrhynchichthys_micracanthus	34480.7	0.8	302	13091.4	0.0145174	0.00872877	1.45174	0.872877	39.874	0.00898595	0.00833104	0.833104	505	0.898595	0.0789583
Amblyrhynchichthys_truncatus	106873	0.9	406	18654.6	0.0259623	0.0114612	2.59623	1.14612	55.8543	0.0123122	0.0101438	1.01438	543	1.23122	0.102862
Anabas_testudineus	17680	0.7	958	41569.9	0.00304007	0.00175732	0.304007	0.175732	42.1948	0.00187686	0.00166683	0.166683	2638	0.187686	0.015995
Anguilla_bicolor	94292	0.9	4	404.34	0.495914	0.322708	49.5914	32.2708	34.9267	0.437997	0.322708	32.2708	35	43.7997	0.997905
Anguilla_marmorata	65591	0.8	40	1486.68	0.074763	0.0681934	7.4763	6.81934	8.78719	0.0688942	0.0677075	6.77075	14	6.88942	0.627657
Annamia_normani	2676.46	0.5	91	5079.26	0.0170221	0.0141888	1.70221	1.41888	16.6444	0.0153356	0.0137305	1.37305	170	1.53356	0.0979082
Anodontostoma_chacunda	25302.2	0.7	12	882.85	0.136675	0.105631	13.6675	10.5631	22.7135	0.105631	0.0910269	9.10269	29	10.5631	0.783226
Aplocheilus_panchax	2323.66	0.4	140	7147.3	0.0104856	0.00933745	1.04856	0.933745	10.9499	0.00933747	0.00923643	0.923643	209	0.933747	0.0523921
Apocryptodon_madurensis	410.908	0.3	3	103.48	0.334054	0.333843	33.4054	33.3843	0.0632087	0.333843	0.333561	33.3561	1	33.3843	0.0632087
Arius_maculatus	153920	0.9	32	1554.14	0.178785	0.153057	17.8785	15.3057	14.3901	0.153057	0.14296	14.296	22	15.3057	0.654097
Arius_microcephalus	61897.1	0.8	5	498.71	0.287971	0.256141	28.7971	25.6141	11.0533	0.256141	0.232027	23.2027	10	25.6141	1.10533
Arius_nenga	87389.8	0.9	6	370.78	0.587434	0.516028	58.7434	51.6028	12.1556	0.516028	0.516028	51.6028	3	51.6028	4.05186
Arius_venosus	3007.46	0.5	5	265.18	0.213613	0.213613	21.3613	21.3613	-2.12149e-07	0.213613	0.213613	21.3613	0	21.3613	0
Atule_mate	106230	0.9	9	664.93	0.417117	0.223672	41.7117	22.3672	46.3767	0.223672	0.160382	16.0382	22	22.3672	2.10803
Aulopareia_cyanomos	1076.99	0.3	2	178.71	0.5	0.5	50	50	4.52516e-08	0.5	0.5	50	1	50	4.52516e-08
Aulopareia_koumansi	864.413	0.3	2	178.71	0.5	0.5	50	50	4.52516e-08	0.5	0.5	50	1	50	4.52516e-08
Aulopareia_unicolor	745.329	0.3	4	352.63	0.25	0.25	25	25	1.3474e-07	0.25	0.25	25	1	25	1.3474e-07
Auriglobus_modestus	15631.1	0.7	150	6784.89	0.0174496	0.0157921	1.74496	1.57921	9.49912	0.0159161	0.0152213	1.52213	113	1.59161	0.084063
Auriglobus_nefastus	17691.6	0.7	218	9579.76	0.0124556	0.00935257	1.24556	0.935257	24.9129	0.00941392	0.00900923	0.900923	279	0.941392	0.0892937
Awaous_grammepomus	3074.59	0.5	39	2886.81	0.0344519	0.0322868	3.44519	3.22868	6.28444	0.0322868	0.0316227	3.16227	55	3.22868	0.114263
Badis_ruber	3177.93	0.5	98	3768.53	0.0188729	0.0154511	1.88729	1.54511	18.131	0.0163059	0.0151377	1.51377	136	1.63059	0.133316
Bagarius_bagarius	756440	0.9	214	9149.91	0.0351824	0.0204657	3.51824	2.04657	41.8296	0.0260011	0.0190893	1.90893	346	2.60011	0.120895
Bagarius_lica	220819	0.9	940	40353.3	0.0137579	0.00353633	1.37579	0.353633	74.296	0.0042924	0.00310443	0.310443	2584	0.42924	0.0287523
Bagarius_suchus	156200	0.9	718	29235.2	0.0182707	0.0043486	1.82707	0.43486	76.199	0.00548507	0.00384254	0.384254	2186	0.548507	0.0348577
Bagarius_vegrandis	382873	0.9	924	39755.8	0.0139118	0.00361307	1.39118	0.361307	74.0287	0.00439295	0.00318272	0.318272	2544	0.439295	0.0290993
Bagrichthys_macracanthus	17128.3	0.7	5	356.82	0.542786	0.350398	54.2786	35.0398	35.4445	0.350398	0.29884	29.884	32	35.0398	1.10764
Bagrichthys_macropterus	15794.9	0.7	53	1879.85	0.052793	0.0468456	5.2793	4.68456	11.2656	0.0477196	0.0443692	4.43692	36	4.77196	0.312934
Bagrichthys_majusculus	30116.1	0.8	398	15345	0.0128784	0.00456682	1.28784	0.456682	64.539	0.00485412	0.0042774	0.42774	1610	0.485412	0.0400864
Bagrichthys_obscurus	152771	0.9	191	8615.49	0.0540581	0.0306377	5.40581	3.06377	43.3245	0.0336705	0.0278556	2.78556	233	3.36705	0.185942
Balantiocheilos_ambusticauda	14709.6	0.7	6	162.4	0.359038	0.278009	35.9038	27.8009	22.5686	0.278009	0.248947	24.8947	5	27.8009	4.51372
Balitora_annamitica	4700.5	0.5	376	16970.4	0.00440933	0.00367603	0.440933	0.367603	16.6306	0.00390457	0.00359046	0.359046	586	0.390457	0.0283798
Balitora_brucei	465.334	0.3	6	329.24	0.17307	0.16678	17.307	16.678	3.6343	0.171262	0.16678	16.678	14	17.1262	0.259593
Balitora_kwangsiensis	7801.4	0.6	7	166.86	0.253657	0.237282	25.3657	23.7282	6.45538	0.237282	0.237282	23.7282	2	23.7282	3.22769
Balitora_lancangjiangensis	3696.85	0.5	266	10998.6	0.00648513	0.00530418	0.648513	0.530418	18.2101	0.00564656	0.00515354	0.515354	495	0.564656	0.036788
Balitoropsis_zollingeri	3417.82	0.5	187	8902.15	0.00894656	0.00781229	0.894656	0.781229	12.6783	0.00784164	0.00771278	0.771278	257	0.784164	0.049332
Bangana_brevirostris	9755.46	0.6	15	637.25	0.10525	0.0778851	10.525	7.78851	25.9998	0.0917591	0.0778851	7.78851	20	9.17591	1.29999
Bangana_devdevi	238866	0.9	4	114.58	0.693306	0.454562	69.3306	45.4562	34.4356	0.454562	0.398117	39.8117	8	45.4562	4.30445
Bangana_diplostomus	156117	0.9	6	179.58	0.624847	0.254839	62.4847	25.4839	59.2157	0.32139	0.201064	20.1064	16	32.139	3.70098
Barbatula_barbatula	921.561	0.3	3	417.48	0.333333	0.333333	33.3333	33.3333	1.14155e-05	0.333333	0.333333	33.3333	31	33.3333	3.68243e-07
Barbichthys_laevis	37086.6	0.8	666	29199.6	0.00714085	0.00307763	0.714085	0.307763	56.9011	0.00325029	0.00287163	0.287163	2023	0.325029	0.0281271
Barbodes_aurotaeniatus	3570.57	0.5	176	6394.89	0.0101556	0.00848002	1.01556	0.848002	16.499	0.00857082	0.00830045	0.830045	270	0.857082	0.0611073
Barbodes_binotatus	16016.1	0.7	79	2590.56	0.0334099	0.02607	3.34099	2.607	21.969	0.0266952	0.0252476	2.52476	62	2.66952	0.354339
Barbodes_rhombeus	5049.35	0.5	276	13383.7	0.00578429	0.00507087	0.578429	0.507087	12.3337	0.00515398	0.00494359	0.494359	312	0.515398	0.0395312
Barbodes_semifasciolatus	2230.96	0.4	41	1785.45	0.0352633	0.0287153	3.52633	2.87153	18.5689	0.0318823	0.0274172	2.74172	103	3.18823	0.18028
Barbonymus_altus	35372.4	0.8	759	32112.8	0.00640857	0.00281599	0.640857	0.2816	56.0589	0.00299618	0.00262779	0.262779	2188	0.299618	0.0256211
Barbonymus_gonionotus	121766	0.9	447	19618	0.0241288	0.00939362	2.41288	0.939362	61.0689	0.0102864	0.00847042	0.847042	1070	1.02864	0.0570737
Barbonymus_schwanefeldii	83878.4	0.9	598	26658.8	0.0210624	0.00639289	2.10624	0.639289	69.6479	0.00690433	0.00564313	0.564313	1538	0.690433	0.0452847
Batrachomoeus_trispinosus	3609.69	0.5	2	131.99	0.500053	0.500053	50.0053	50.0053	6.44632e-09	0.500053	0.500053	50.0053	0	50.0053	0
Belodontichthys_dinema	230624	0.9	51	2302.21	0.120934	0.102738	12.0934	10.2738	15.0463	0.102738	0.102738	10.2738	24	10.2738	0.62693
Belodontichthys_truncatus	107205	0.9	571	25078.5	0.0211705	0.00622647	2.11705	0.622647	70.5889	0.00694136	0.00556406	0.556406	1387	0.694136	0.0508932
Betta_imbellis	782.657	0.3	5	186.71	0.234275	0.2	23.4275	20	14.6302	0.2	0.2	20	25	20	0.585207
Betta_prima	3318.32	0.5	165	7523.79	0.0098466	0.00854807	0.98466	0.854807	13.1876	0.00857456	0.00841246	0.841246	187	0.857456	0.070522
Betta_siamorientalis	225.045	0.3	2	197.35	0.5	0.5	50	50	0	0.5	0.5	50	16	50	0
Betta_smaragdina	3935.54	0.5	333	13001	0.0055428	0.00381797	0.55428	0.381797	31.1185	0.00389326	0.00371333	0.371333	1450	0.389326	0.021461
Betta_splendens	315.173	0.3	27	1024.61	0.0459161	0.0414135	4.59161	4.14135	9.80607	0.0414135	0.0414103	4.14103	57	4.14135	0.172036
Betta_stiktos	164.663	0.3	3	183.39	0.33894	0.338644	33.894	33.8644	0.0875063	0.338644	0.338549	33.8549	4	33.8644	0.0218766
Boesemania_microlepis	136736	0.9	445	17903.5	0.0241897	0.00904946	2.41897	0.904946	62.5896	0.00996901	0.00814301	0.814301	975	0.996901	0.0641944
Boleophthalmus_boddarti	14102.3	0.7	401	15751	0.00736134	0.00437699	0.736134	0.437699	40.5409	0.00444845	0.00420293	0.420293	1048	0.444845	0.038684
Boraras_micros	326.902	0.3	13	642.26	0.0892197	0.0879366	8.92197	8.79366	1.43818	0.0879366	0.0879366	8.79366	11	8.79366	0.130744
Boraras_urophthalmoides	1820.43	0.4	44	2633.64	0.0288353	0.0281033	2.88353	2.81033	2.53835	0.0281033	0.0280053	2.80053	48	2.81033	0.0528823
Bostrychus_scalaris	709.201	0.3	1	85.67	1	1	100	100	0	1	1		0		0
Bostrychus_sinensis	5253.97	0.5	27	1687.48	0.046784	0.0439857	4.6784	4.39857	5.98136	0.0439857	0.0426358	4.26358	42	4.39857	0.142413
Brachirus_harmandi	9423.59	0.6	403	18345.7	0.00504246	0.00403599	0.504246	0.403599	19.96	0.00413253	0.00393076	0.393076	589	0.413253	0.0338879
Brachirus_orientalis	38881.2	0.8	42	1915.22	0.0781714	0.0674412	7.81714	6.74412	13.7265	0.0700891	0.0664702	6.64702	22	7.00891	0.623931
Brachirus_panoides	21200.5	0.7	149	7047.99	0.0173735	0.0145005	1.73735	1.45005	16.5368	0.0146251	0.0138412	1.38412	126	1.46251	0.131244
Brachirus_siamensis	15949.4	0.7	154	7581.26	0.0162762	0.0131014	1.62762	1.31014	19.5059	0.0132147	0.0125405	1.25405	149	1.32147	0.130912
Brachyamblyopus_brachysoma	943.101	0.3	2	178.71	0.5	0.5	50	50	4.52516e-08	0.5	0.5	50	1	50	4.52516e-08
Brachygobius_aggregatus	1996.8	0.4	1	19.63	1	1	100	100	0	1	1		0		0
Brachygobius_doriae	437.554	0.3	27	1687.48	0.0414912	0.0409135	4.14912	4.09135	1.39236	0.0409135	0.0406479	4.06479	42	4.09135	0.0331513
Brachygobius_kabiliensis	526.506	0.3	32	1814.89	0.0382972	0.038069	3.82972	3.8069	0.595707	0.038069	0.0379798	3.79798	29	3.8069	0.0205416
Brachygobius_mekongensis	372.511	0.3	342	13840.6	0.00395677	0.0035264	0.395677	0.35264	10.8769	0.00355349	0.00348028	0.348028	760	0.355349	0.0143117
Brachygobius_nunus	1171.98	0.4	1	103.48	1	1	100	100	0	1	1		0		0
Brachygobius_sabanus	183.553	0.3	3	463.4	0.333333	0.333333	33.3333	33.3333	6.43497e-08	0.333333	0.333333	33.3333	5	33.3333	1.28699e-08
Brevitrygon_imbricata	27230	0.8	5	86.82	0.572555	0.572555	57.2555	57.2555	-8.0097e-08	0.572555	0.572555	57.2555	0	57.2555	0
Butis_amboinensis	2870.28	0.5	14	1380.48	0.0852247	0.0823879	8.52247	8.23879	3.32867	0.0823879	0.0813346	8.13346	33	8.23879	0.100869
Butis_butis	7685.22	0.6	16	1004.57	0.0915292	0.0821324	9.15292	8.21324	10.2664	0.0821324	0.076543	7.6543	24	8.21324	0.427767
Butis_humeralis	3046.03	0.5	3	264.38	0.333358	0.333358	33.3358	33.3358	8.68473e-05	0.333358	0.333357	33.3357	1	33.3358	8.68473e-05
Butis_koilomatodon	2216.38	0.4	15	1041.2	0.0692047	0.0687426	6.92047	6.87426	0.667757	0.0687426	0.0681394	6.81394	25	6.87426	0.0267103
Caragobius_urolepis	4354.7	0.5	93	5284.85	0.0158926	0.0130803	1.58926	1.30803	17.6957	0.0133973	0.0126838	1.26838	136	1.33973	0.130115
Caranx_sexfasciatus	242964	0.9	1	85.67	1	1	100	100	0	1	1		0		0
Carassius_auratus	68037.8	0.8	99	4832.51	0.0302473	0.0147321	3.02473	1.47321	51.2947	0.0213166	0.0141334	1.41334	362	2.13166	0.141698
Carassius_praecipuus	4621.04	0.5	1	56.39	1	1	100	100	0	1	1		0		0
Carinotetraodon_lorteti	3684.94	0.5	68	3309.34	0.0232806	0.022368	2.32806	2.2368	3.92006	0.022368	0.0222612	2.22612	57	2.2368	0.0687731
Catlocarpio_siamensis	1.26321e+06	0.9	561	23718	0.0237003	0.00612861	2.37003	0.612861	74.1412	0.00664205	0.00548894	0.548894	1805	0.664205	0.0410755
Cephalocassis_borneensis	36357.6	0.8	394	17064.9	0.0115817	0.00626123	1.15817	0.626123	45.9386	0.00646601	0.00579976	0.579976	771	0.646601	0.0595831
Cephalopholis_boenak	31792.3	0.8	5	462.68	0.342097	0.249173	34.2097	24.9173	27.1632	0.249173	0.210483	21.0483	13	24.9173	2.08947
Ceratogarra_cambodgiensis	29199.2	0.8	863	37405.2	0.00556947	0.00249026	0.556947	0.249026	55.2873	0.00270547	0.00230871	0.230871	2389	0.270547	0.0231425
Ceratogarra_fasciacauda	2505.13	0.5	413	15740.9	0.00440141	0.00349585	0.440141	0.349585	20.5745	0.0035886	0.0034077	0.34077	776	0.35886	0.0265135
Channa_auroflammea	99771.5	0.9	10	275.12	0.512962	0.512962	51.2962	51.2962	-5.63194e-08	0.512962	0.512962	51.2962	0	51.2962	0
Channa_gachua	18297.8	0.7	1008	44175.2	0.00284797	0.00164645	0.284797	0.164645	42.1887	0.00177122	0.00156263	0.156263	2913	0.177122	0.0144829
Channa_lucius	48484.5	0.8	908	38844.5	0.00528991	0.00235481	0.528991	0.235481	55.4849	0.00260361	0.00217857	0.217857	2444	0.260361	0.0227025
Channa_marulioides	15831.2	0.7	33	1262.89	0.0705277	0.0653724	7.05277	6.53724	7.30971	0.0677056	0.0648371	6.48371	6	6.77056	1.21828
Channa_marulius	333324	0.9	683	30594	0.0187148	0.00499947	1.87148	0.499947	73.2861	0.00541759	0.00439629	0.43963	2045	0.541759	0.0358367
Channa_melasoma	27687.9	0.8	565	22191	0.00898773	0.00377105	0.898773	0.377105	58.0422	0.00387092	0.00354723	0.354723	1824	0.387092	0.0318214
Channa_micropeltes	250659	0.9	630	26021.2	0.0205048	0.00575291	2.05048	0.575291	71.9436	0.0061981	0.00508563	0.508563	1888	0.61981	0.0381057
Channa_orientalis	23134.3	0.7	26	1114.65	0.0925196	0.0732142	9.25196	7.32142	20.8663	0.0884457	0.0708647	7.08647	9	8.84457	2.31848
Channa_punctata	32442.4	0.8	2	169.4	0.513927	0.5	51.3927	50	2.7099	0.5	0.5	50	19	50	0.142626
Channa_striata	151798	0.9	1022	44772.2	0.0123158	0.00318016	1.23158	0.318016	74.1782	0.00396035	0.00277778	0.277778	2985	0.396035	0.0248503
Chanos_chanos	2.10346e+06	0.9	3	379.01	0.478475	0.428496	47.8475	42.8496	10.4454	0.428496	0.375891	37.5891	6	42.8496	1.7409
Chaudhuria_caudata	2225.56	0.4	360	14956.6	0.00415995	0.0036163	0.415995	0.36163	13.0687	0.0036738	0.00355215	0.355215	600	0.36738	0.0217812
Chaudhuria_fusipinnis	195.09	0.3	1	163.06	1	1	100	100	0	1	1		6		0
Chelonodontops_patoca	625.52	0.3	17	1037.24	0.0611595	0.0598285	6.11595	5.98285	2.17628	0.0598285	0.0591726	5.91726	26	5.98285	0.083703
Chitala_blanci	140494	0.9	243	11225	0.0411082	0.0200318	4.11082	2.00318	51.2706	0.0222262	0.0182704	1.82704	379	2.22262	0.135279
Chitala_chitala	70799.9	0.8	49	1553.41	0.070189	0.0624865	7.0189	6.24865	10.974	0.0624865	0.0606502	6.06502	18	6.24865	0.609666
Chitala_lopis	48115	0.8	57	2065.3	0.0620303	0.0561087	6.20303	5.61087	9.54637	0.0575787	0.0552889	5.52889	10	5.75787	0.954637
Chitala_ornata	139789	0.9	531	22320.5	0.0221905	0.0073538	2.21905	0.73538	66.8606	0.00822906	0.00659608	0.659608	1221	0.822906	0.0547589
Chonerhinos_naritus	53031.9	0.8	1	78.85	1	1	100	100	0	1	1		4		0
Cirrhinus_jullieni	37202	0.8	283	12179.4	0.0149093	0.00957958	1.49093	0.957958	35.7475	0.00992327	0.00918048	0.918048	519	0.992327	0.0688776
Cirrhinus_microlepis	145504	0.9	387	16261.6	0.0279503	0.0125619	2.79503	1.25619	55.0565	0.0138864	0.011414	1.1414	576	1.38864	0.0955841
Cirrhinus_molitorella	96500	0.9	395	18093.9	0.0240097	0.0114607	2.40097	1.14607	52.2662	0.0135462	0.010452	1.0452	620	1.35462	0.0843003
Cirrhinus_mrigala	159920	0.9	38	1537.3	0.151657	0.0813446	15.1657	8.13446	46.3629	0.118802	0.077858	7.7858	55	11.8802	0.842961
Cirrhinus_reba	77869.3	0.9	8	661.66	0.405192	0.37137	40.5192	37.137	8.34701	0.37137	0.366661	36.6661	7	37.137	1.19243
Claea_dabryi	3031.59	0.5	5	179.39	0.277116	0.2	27.7116	20	27.8282	0.242663	0.2	20	68	24.2663	0.409238
Clarias_batrachus	47157.3	0.8	271	10139.3	0.0146185	0.00922058	1.46185	0.922058	36.9253	0.0104674	0.00881185	0.881185	416	1.04674	0.0887626
Clarias_fuscus	16039.1	0.7	65	3557.38	0.0282269	0.0220863	2.82269	2.20863	21.7544	0.0251357	0.0213242	2.13242	181	2.51357	0.12019
Clarias_macrocephalus	136396	0.9	345	14743.3	0.0298713	0.0125434	2.98713	1.25434	58.0086	0.0137825	0.011457	1.1457	707	1.37825	0.0820489
Clarias_meladerma	2236.62	0.4	20	494.39	0.0724445	0.0700792	7.24445	7.00792	3.26497	0.0700792	0.070058	7.0058	11	7.00792	0.296815
Clarias_nieuhofii	43036.4	0.8	90	5069.17	0.0407902	0.0309616	4.07902	3.09616	24.0956	0.0309616	0.0288141	2.88141	105	3.09616	0.229482
Clarias_serniosus	16227	0.7	1	22.49	1	1	100	100	0	1	1		0		0
Clupeichthys_aesarnensis	3178.26	0.5	612	26333.6	0.00287228	0.00215548	0.287228	0.215548	24.9557	0.00218326	0.00211013	0.211013	1914	0.218326	0.0130385
Clupeichthys_goniognathus	3774.44	0.5	19	694.54	0.0874102	0.0795666	8.74102	7.95666	8.97335	0.0795666	0.0735421	7.35421	20	7.95666	0.448667
Clupeoides_borneensis	6073.06	0.6	178	8567.5	0.0112627	0.00968181	1.12627	0.968181	14.0367	0.00968181	0.00942782	0.942782	235	0.968181	0.0597307
Clupisoma_longianale	19844.1	0.7	47	2617.37	0.0429244	0.0263161	4.29244	2.63161	38.692	0.033711	0.0253247	2.53247	213	3.3711	0.181653
Clupisoma_sinense	59543.7	0.8	1010	44145.3	0.00459778	0.00204455	0.459778	0.204455	55.5318	0.00230984	0.00189225	0.189225	2949	0.230984	0.0188307
Cobitis_arenae	3349.44	0.5	104	3524.93	0.0180028	0.0147941	1.80028	1.47941	17.8232	0.0148716	0.0144467	1.44467	181	1.48716	0.098471
Cobitis_guttatus	4692.97	0.5	51	1711.96	0.0334999	0.0321644	3.34999	3.21644	3.98653	0.0325375	0.0311284	3.11284	13	3.25375	0.306656
Cobitis_laoensis	6618.78	0.6	1	149.26	1	1	100	100	0	1	1		7		0
Cobitis_taenia	2128.56	0.4	1	146.32	1	1	100	100	0	1	1		34		0
Coilia_dussumieri	12642.1	0.6	5	584.74	0.27743	0.277278	27.743	27.7278	0.0548155	0.277278	0.277277	27.7277	7	27.7278	0.00783079
Coilia_grayii	17005.3	0.7	7	612.52	0.178088	0.178088	17.8088	17.8088	0.000148817	0.178088	0.178088	17.8088	5	17.8088	2.97634e-05
Coilia_lindmani	15798.6	0.7	115	5699.48	0.019862	0.0169633	1.9862	1.69633	14.5941	0.0172985	0.0165107	1.65107	99	1.72985	0.147416
Coilia_macrognathos	19822.4	0.7	44	2109.45	0.0508097	0.0478913	5.08097	4.78913	5.74382	0.0478913	0.0478913	4.78913	25	4.78913	0.229753
Coilia_mystus	13739.9	0.7	3	379.01	0.374022	0.362103	37.4022	36.2103	3.18654	0.362103	0.3462	34.62	6	36.2103	0.53109
Coilia_rebentischii	8208.6	0.6	9	712.96	0.134092	0.118994	13.4092	11.8994	11.259	0.118994	0.113026	11.3026	22	11.8994	0.511771
Coilia_reynaldi	3165.22	0.5	3	379.01	0.341535	0.339133	34.1535	33.9133	0.70333	0.339133	0.335927	33.5927	6	33.9133	0.117222
Congresox_talabon	89826.2	0.9	3	379.01	0.478475	0.428496	47.8475	42.8496	10.4454	0.428496	0.375891	37.5891	6	42.8496	1.7409
Coptodon_zillii	15691.1	0.7	4	135.77	0.365053	0.313746	36.5053	31.3746	14.0547	0.313746	0.313746	31.3746	12	31.3746	1.17122
Corica_laciniata	4311.21	0.5	547	24721.3	0.00316631	0.00243522	0.316631	0.243522	23.0897	0.0024847	0.00237786	0.237786	1546	0.24847	0.0149351
Corica_soborna	1792.22	0.4	25	1025.09	0.0565049	0.0564881	5.65049	5.64881	0.0296941	0.0564881	0.0564677	5.64677	12	5.64881	0.00247451
Cosmochilus_cardinalis	78851.1	0.9	29	1480.45	0.167503	0.0569904	16.7503	5.69904	65.9766	0.135076	0.055244	5.5244	70	13.5076	0.942523
Cosmochilus_harmandi	280914	0.9	449	19566.2	0.0234888	0.00923232	2.34888	0.923232	60.6949	0.0104449	0.00822239	0.822239	719	1.04449	0.0844157
Crenimugil_seheli	128246	0.9	41	2433.11	0.229511	0.147084	22.9511	14.7084	35.9143	0.147084	0.120064	12.0064	50	14.7084	0.718286
Creteuchiloglanis_kamengensis	12646.1	0.6	15	857.22	0.110962	0.0858729	11.0962	8.58729	22.6103	0.101133	0.0858729	8.58729	41	10.1133	0.55147
Creteuchiloglanis_longipectoralis	21932	0.7	37	2040.04	0.0486093	0.0327808	4.86093	3.27808	32.5626	0.0426917	0.032763	3.2763	114	4.26917	0.285637
Crossocheilus_atrilimes	19827	0.7	513	21632.8	0.00561822	0.00332071	0.561822	0.332071	40.894	0.00344189	0.00317237	0.317237	1478	0.344189	0.0276685
Crossocheilus_cobitis	8371.04	0.6	827	35164.6	0.00263829	0.00180069	0.263829	0.180069	31.7478	0.00185308	0.00173727	0.173727	2271	0.185308	0.0139797
Crossocheilus_oblongus	20085.2	0.7	554	21295.7	0.00552346	0.00314566	0.552346	0.314566	43.0491	0.00325134	0.00303367	0.303367	1730	0.325134	0.0248839
Crossocheilus_reticulatus	15885.5	0.7	578	24256	0.00480524	0.00306427	0.480524	0.306427	36.2306	0.0032003	0.00294357	0.294357	1345	0.32003	0.0269373
Crossocheilus_tchangi	13368.9	0.7	2	102.62	0.580543	0.5	58.0543	50	13.8737	0.580543	0.5	50	1	58.0543	13.8737
Cryptarius_daugueti	10748.1	0.6	1	55.88	1	1	100	100	0	1	1		0		0
Cyclocheilichthys_apogon	37922.4	0.8	462	19418.6	0.00994948	0.00509757	0.994948	0.509757	48.7655	0.00528378	0.00474141	0.474141	1015	0.528378	0.0480448
Cyclocheilichthys_armatus	28021.6	0.8	854	37235.3	0.0055449	0.00250705	0.55449	0.250705	54.7864	0.00269211	0.00233101	0.233101	2365	0.269211	0.0231655
Cyclocheilichthys_heteronema	21243	0.7	519	22724.2	0.00571152	0.00333341	0.571152	0.333341	41.637	0.00337857	0.00318839	0.318839	1620	0.337857	0.0257018
Cyclocheilichthys_lagleri	28947.9	0.8	206	9634.24	0.01791	0.0143816	1.791	1.43816	19.7004	0.0150142	0.0139321	1.39321	136	1.50142	0.144856
Cyclocheilichthys_repasson	28197	0.8	822	36255.4	0.00566316	0.00258818	0.566316	0.258818	54.2979	0.00278953	0.00240643	0.240643	2309	0.278953	0.0235158
Cyclocheilos_enoplos	8055.99	0.6	401	17511.3	0.00526254	0.00372223	0.526254	0.372223	29.2693	0.0037973	0.00362084	0.362084	1046	0.37973	0.0279822
Cyclocheilos_furcatus	13500	0.7	172	8371.44	0.0152029	0.012357	1.52029	1.2357	18.719	0.0125752	0.0116573	1.16573	218	1.25752	0.0858669
Cynoglossus_cynoglossus	2665.56	0.5	10	797.78	0.146431	0.146431	14.6431	14.6431	-3.19492e-07	0.146431	0.146431	14.6431	5	14.6431	-6.38983e-08
Cynoglossus_feldmanni	35373.9	0.8	16	1145.16	0.159969	0.113705	15.9969	11.3705	28.9205	0.113705	0.0953459	9.53459	31	11.3705	0.932918
Cynoglossus_lingua	72108.3	0.8	17	1092.62	0.149547	0.134685	14.9547	13.4685	9.93805	0.134685	0.124133	12.4133	22	13.4685	0.451729
Cynoglossus_microlepis	50929.7	0.8	157	6710.31	0.0281934	0.0188933	2.81934	1.88933	32.9868	0.0191257	0.0179584	1.79584	137	1.91257	0.240779
Cynoglossus_puncticeps	52840.5	0.8	22	1224.64	0.142645	0.117998	14.2645	11.7998	17.2782	0.117998	0.105469	10.5469	28	11.7998	0.617079
Cynoglossus_quadrilineatus	45776.9	0.8	4	457.86	0.318944	0.285876	31.8944	28.5876	10.3679	0.285876	0.26382	26.382	10	28.5876	1.03679
Cyprinus_barbatus	3574.06	0.5	1	160.47	1	1	100	100	0	1	1		18		0
Cyprinus_chilia	989.8	0.3	4	513.9	0.250001	0.25	25.0001	25	0.000270729	0.25	0.25	25	74	25	3.65849e-06
Cyprinus_daliensis	2849.15	0.5	1	160.47	1	1	100	100	0	1	1		18		0
Cyprinus_longipectoralis	3970.42	0.5	1	160.47	1	1	100	100	0	1	1		18		0
Cyprinus_megalophthalmus	6336.71	0.6	1	160.47	1	1	100	100	0	1	1		18		0
Cyprinus_pellegrini	3002.13	0.5	1	160.47	1	1	100	100	0	1	1		18		0
Cyprinus_rubrofuscus	50042.3	0.8	445	19901.3	0.00942068	0.00552096	0.942068	0.552096	41.3953	0.00641931	0.00509833	0.509834	618	0.641931	0.0669827
Dagetichthys_commersonnii	7982.47	0.6	4	447.3	0.263405	0.258012	26.3405	25.8012	2.04752	0.258012	0.253476	25.3476	12	25.8012	0.170627
Danio_albolineatus	1667.01	0.4	36	1071.47	0.0451114	0.040148	4.51114	4.0148	11.0025	0.040148	0.0386852	3.86852	56	4.0148	0.196474
Danio_roseus	1833.29	0.4	299	12336.7	0.00493303	0.00395758	0.493303	0.395758	19.7738	0.00412757	0.00388175	0.388175	1087	0.412757	0.0181912
Datnioides_microlepis	88026.4	0.9	82	2718.57	0.0860089	0.0660077	8.60089	6.60077	23.2548	0.0660077	0.0614837	6.14837	18	6.60077	1.29194
Datnioides_polota	42374.9	0.8	220	10179.2	0.0188037	0.0107167	1.88037	1.07167	43.0073	0.0110962	0.0100396	1.00396	332	1.10962	0.12954
Datnioides_pulcher	74690.4	0.8	103	4633.23	0.0359208	0.028932	3.59208	2.8932	19.4559	0.028932	0.0279585	2.79585	65	2.8932	0.299322
Datnioides_undecimradiatus	52824.4	0.8	342	14696.8	0.0135877	0.00675534	1.35877	0.675534	50.2835	0.00694434	0.0063924	0.63924	840	0.694434	0.0598614
Dendrophysa_russelii	15635.9	0.7	4	319.23	0.258937	0.254818	25.8937	25.4818	1.59054	0.254818	0.253562	25.3562	9	25.4818	0.176727
Dermogenys_orientalis	1108.38	0.3	6	528.03	0.166783	0.166783	16.6783	16.6783	-1.91079e-07	0.166783	0.166783	16.6783	6	16.6783	-3.18464e-08
Dermogenys_pusilla	7285.01	0.6	43	1636.52	0.0417497	0.0398706	4.17497	3.98706	4.50067	0.0398706	0.0398705	3.98705	14	3.98706	0.321476
Dermogenys_siamensis	1392.36	0.4	674	28816.8	0.00227307	0.00185278	0.227307	0.185278	18.4901	0.00187392	0.0018247	0.18247	2009	0.187392	0.00920363
Desmopuntius_hexazona	3173.88	0.5	716	29232.6	0.0025085	0.0018815	0.25085	0.18815	24.995	0.00191344	0.00183586	0.183587	2059	0.191344	0.0121394
Devario_acrostomus	2530.09	0.5	46	1951.88	0.0392127	0.0313605	3.92127	3.13605	20.0246	0.0344378	0.0298152	2.98152	54	3.44378	0.370826
Devario_aequipinnatus	3783.87	0.5	4	68.63	0.529429	0.25	52.9429	25	52.7793	0.478501	0.25	25	5	47.8501	10.5559
Devario_apopyris	1023.56	0.3	11	513.18	0.116007	0.099981	11.6007	9.9981	13.8145	0.109021	0.0949073	9.49073	30	10.9021	0.460482
Devario_browni	3795.21	0.5	7	315.24	0.239124	0.14641	23.9124	14.641	38.7723	0.221023	0.144446	14.4446	17	22.1023	2.28072
Devario_chrysotaeniatus	4576.18	0.5	100	4052.33	0.0181285	0.0156428	1.81285	1.56428	13.7114	0.0164482	0.0151916	1.51916	212	1.64482	0.0646765
Devario_fangfangae	2407.96	0.4	8	546.53	0.125715	0.125262	12.5715	12.5262	0.359953	0.125393	0.125052	12.5052	13	12.5393	0.0276887
Devario_gibber	1355	0.4	41	1988.95	0.0316566	0.0284373	3.16566	2.84373	10.1694	0.0285671	0.0283645	2.83645	46	2.85671	0.221075
Devario_kysonensis	878.279	0.3	38	1817.26	0.0326203	0.029809	3.26203	2.9809	8.6185	0.0298348	0.0297676	2.97676	46	2.98348	0.187359
Devario_laoensis	3052.28	0.5	152	5635.79	0.0122881	0.00992922	1.22881	0.992922	19.1965	0.0105154	0.00966767	0.966767	288	1.05154	0.0666546
Devario_leptos	2459.1	0.4	62	2181.57	0.0223264	0.0189787	2.23264	1.89787	14.9945	0.020207	0.0187867	1.87867	91	2.0207	0.164774
Devario_pullatus	2643.57	0.5	1	67.08	1	1	100	100	0	1	1		1		0
Devario_quangbinhensis	1853.59	0.4	4	192.3	0.267611	0.267496	26.7611	26.7496	0.0431632	0.267577	0.267496	26.7496	2	26.7577	0.0215816
Devario_regina	926.827	0.3	5	425.37	0.200016	0.2	20.0016	20	0.00789661	0.2	0.2	20	52	20	0.000151858
Devario_salmonatus	737.231	0.3	23	1034.98	0.055613	0.0526483	5.5613	5.26483	5.33086	0.0526949	0.0526483	5.26483	18	5.26949	0.296159
Devario_subviridis	413.471	0.3	2	258.53	0.5	0.5	50	50	1.57802e-08	0.5	0.5	50	6	50	2.63003e-09
Deveximentum_insidiator	18640	0.7	7	546.64	0.219626	0.178497	21.9626	17.8497	18.7268	0.178497	0.157576	15.7576	13	17.8497	1.44052
Deveximentum_ruconius	6119.55	0.6	5	369.89	0.203818	0.202423	20.3818	20.2423	0.684862	0.202423	0.201313	20.1313	6	20.2423	0.114144
Dichotomyctere_fluviatilis	11332.6	0.6	16	902.84	0.115369	0.102924	11.5369	10.2924	10.7872	0.102924	0.102924	10.2924	22	10.2924	0.490327
Dichotomyctere_nigroviridis	1213.72	0.4	18	1182.31	0.0817738	0.0767874	8.17738	7.67874	6.09779	0.0767874	0.0767874	7.67874	22	7.67874	0.277172
Dichotomyctere_ocellatus	5568.34	0.6	59	2643.1	0.0336798	0.0320665	3.36798	3.20665	4.79005	0.0324533	0.0319755	3.19755	46	3.24533	0.104132
Discherodontus_ashmeadi	15755.4	0.7	269	11610.2	0.0104399	0.00688129	1.04399	0.688129	34.0867	0.00711033	0.00656346	0.656346	578	0.711033	0.0589734
Discherodontus_parvus	5818.84	0.6	65	2951.5	0.0322899	0.0266941	3.22899	2.66941	17.3298	0.0279858	0.0258507	2.58507	167	2.79858	0.103772
Discherodontus_schroederi	10368	0.6	39	1252.78	0.0534117	0.0421104	5.34117	4.21104	21.1589	0.0474012	0.0416201	4.16201	29	4.74012	0.729617
Drepane_punctata	18281.7	0.7	4	447.3	0.282558	0.267171	28.2558	26.7171	5.44572	0.267171	0.257243	25.7243	12	26.7171	0.45381
Drombus_globiceps	260.151	0.3	3	264.38	0.333333	0.333333	33.3333	33.3333	9.47817e-08	0.333333	0.333333	33.3333	1	33.3333	9.47817e-08
Eleotris_fusca	5423.69	0.6	35	2676.03	0.042482	0.0389632	4.2482	3.89632	8.28321	0.0389632	0.0372592	3.72592	54	3.89632	0.153393
Eleotris_melanosoma	22215.7	0.7	52	3274.69	0.0446229	0.0386189	4.46229	3.86189	13.455	0.0386189	0.0364213	3.64213	57	3.86189	0.236053
Eleotris_oxycephala	11964.5	0.6	4	209.3	0.291101	0.291101	29.1101	29.1101	6.18171e-09	0.291101	0.291101	29.1101	0	29.1101	0
Eleutheronema_tetradactylum	364915	0.9	17	1007.68	0.340615	0.231083	34.0615	23.1083	32.1573	0.231083	0.180673	18.0673	23	23.1083	1.39814
Ellochelon_vaigiensis	10985.8	0.6	2	131.99	0.50059	0.50059	50.059	50.059	-9.3597e-08	0.50059	0.50059	50.059	0	50.059	0
Elops_hawaiensis	219693	0.9	17	1071.89	0.36527	0.225322	36.527	22.5322	38.3135	0.225322	0.166997	16.6997	27	22.5322	1.41902
Elops_machnata	84252.8	0.9	17	1001.25	0.37898	0.24512	37.898	24.512	35.3211	0.24512	0.183181	18.3181	23	24.512	1.5357
Elops_saurus	16214.2	0.7	4	447.3	0.282558	0.267171	28.2558	26.7171	5.44572	0.267171	0.257243	25.7243	12	26.7171	0.45381
Epalzeorhynchos_bicolor	642.924	0.3	1	30.95	1	1	100	100	0	1	1		0		0
Epalzeorhynchos_frenatum	10606.2	0.6	456	18796.7	0.00480077	0.00351563	0.480077	0.351563	26.7695	0.00361338	0.00340781	0.340781	947	0.361338	0.0282677
Epalzeorhynchos_munense	9977.45	0.6	463	18913.7	0.00485544	0.00328744	0.485544	0.328744	32.2937	0.00332263	0.00319378	0.319378	1431	0.332263	0.0225672
Epinephelus_areolatus	76877.1	0.9	3	379.01	0.478475	0.428496	47.8475	42.8496	10.4454	0.428496	0.375891	37.5891	6	42.8496	1.7409
Escualosa_thoracata	1584.27	0.4	1	85.67	1	1	100	100	0	1	1		0		0
Esomus_ahli	1715.9	0.4	21	1047.83	0.0645177	0.0536835	6.45177	5.36835	16.7926	0.0536835	0.052578	5.2578	65	5.36835	0.258348
Esomus_danrica	12814.6	0.7	6	127.38	0.376263	0.367698	37.6263	36.7698	2.2763	0.367698	0.356268	35.6268	1	36.7698	2.2763
Esomus_longimanus	5712.47	0.6	422	16629.9	0.00537865	0.00392527	0.537865	0.392527	27.0213	0.00402196	0.00378851	0.378851	897	0.402196	0.030124
Esomus_metallicus	3773.77	0.5	501	20005.4	0.0035997	0.00274522	0.35997	0.274521	23.7376	0.00280078	0.0026797	0.26797	1404	0.280078	0.0169071
Eubleekeria_splendens	28045.1	0.8	36	2204.55	0.109119	0.0831642	10.9119	8.31642	23.7855	0.0831642	0.0723818	7.23818	49	8.31642	0.485419
Eugnathogobius_kabilia	276.496	0.3	3	415.65	0.333333	0.333333	33.3333	33.3333	1.0008e-07	0.333333	0.333333	33.3333	5	33.3333	2.00159e-08
Eugnathogobius_mas	1100.31	0.3	1	88.25	1	1	100	100	0	1	1		0		0
Eugnathogobius_siamensis	1205.6	0.4	214	10423.4	0.00694733	0.00590772	0.694733	0.590772	14.9642	0.0060633	0.00575557	0.575557	369	0.60633	0.0405535
Euristhmus_lepturus	2357.07	0.4	1	68.29	1	1	100	100	0	1	1		6		0
Exyrias_puntang	8766.47	0.6	41	2433.11	0.0424105	0.0377101	4.24105	3.77101	11.083	0.0377101	0.0361222	3.61222	50	3.77101	0.22166
Fibramia_lateralis	2392.62	0.4	12	636.26	0.0892829	0.0858059	8.92829	8.58059	3.89439	0.0858059	0.0841333	8.41333	15	8.58059	0.259626
Filimanus_heptadactyla	39671.5	0.8	1	68.29	1	1	100	100	0	1	1		6		0
Fluvitrygon_oxyrhynchus	45000.6	0.8	16	496.51	0.19673	0.19673	19.673	19.673	1.00468e-08	0.19673	0.19673	19.673	0	19.673	0
Folifer_brevifilis	73608.2	0.8	248	9864.05	0.01794	0.00888274	1.794	0.888274	50.4863	0.0112498	0.00832889	0.832889	548	1.12498	0.0921282
Garra_cyrano	4429.61	0.5	142	6870.73	0.0108032	0.00938261	1.08032	0.938261	13.1499	0.00942374	0.00913526	0.913526	242	0.942374	0.0543386
Garra_fuliginosa	4728.77	0.5	39	1124.95	0.0514862	0.0348593	5.14862	3.48593	32.2939	0.0348593	0.0345648	3.45648	94	3.48593	0.343552
Garra_imberbis	2433.61	0.4	2	146.12	0.500462	0.5	50.0462	50	0.0923222	0.500327	0.5	50	2	50.0327	0.0461611
Garra_mirofrontis	5454.82	0.6	45	2503.27	0.0333174	0.0256987	3.33174	2.56987	22.867	0.0301455	0.0251772	2.51772	192	3.01455	0.119099
Garra_nasuta	54927.8	0.8	5	96.9	0.684478	0.539657	68.4478	53.9657	21.1579	0.539657	0.388075	38.8075	1	53.9657	21.1579
Garra_orientalis	27146.7	0.7	33	1776.8	0.0533416	0.0387555	5.33416	3.87555	27.3447	0.0508448	0.0387244	3.87244	71	5.08448	0.385137
Gazza_minuta	32051.9	0.8	40	2415.19	0.097104	0.0728231	9.7104	7.28231	25.0051	0.0728231	0.0638064	6.38064	50	7.28231	0.500101
Gerres_filamentosus	30615.8	0.8	9	775.76	0.22063	0.139404	22.063	13.9404	36.8153	0.139404	0.115385	11.5385	28	13.9404	1.31483
Gerres_limbatus	4384.62	0.5	9	805.08	0.117123	0.11564	11.7123	11.564	1.26679	0.11564	0.113984	11.3984	21	11.564	0.0603234
Glossogobius_aureus	24377	0.7	275	13091.9	0.00941574	0.00688086	0.941574	0.688086	26.9218	0.00717269	0.00658001	0.658001	350	0.717269	0.0769193
Glossogobius_giuris	58179.9	0.8	52	2302.17	0.0611052	0.058419	6.11052	5.8419	4.39596	0.058419	0.0576628	5.76628	13	5.8419	0.338151
Glossogobius_koragensis	4779.94	0.5	2	459.32	0.5	0.5	50	50	0	0.5	0.5	50	5	50	0
Glossogobius_sparsipapillus	5708.09	0.6	59	3736.53	0.0277579	0.0256464	2.77579	2.56464	7.60711	0.0256464	0.0249685	2.49685	72	2.56464	0.105654
Glyptothorax_buchanani	2706.24	0.5	10	219.15	0.220335	0.1	22.0335	10	54.6145	0.1	0.1	10	17	10	3.21262
Glyptothorax_deqinensis	20973.2	0.7	55	2381.84	0.0400151	0.0295776	4.00151	2.95776	26.0838	0.0346972	0.02905	2.905	90	3.46972	0.28982
Glyptothorax_filicatus	1529.48	0.4	24	1200.7	0.0559344	0.0525244	5.59344	5.25244	6.09633	0.052657	0.0525244	5.25244	20	5.2657	0.304816
Glyptothorax_forabilis	2228.52	0.4	2	192.79	0.5	0.5	50	50	0	0.5	0.5	50	14	50	0
Glyptothorax_fuscus	7981.29	0.6	99	4452.01	0.0191188	0.0165	1.91188	1.65	13.6976	0.0172829	0.0158612	1.58612	155	1.72829	0.0883715
Glyptothorax_housei	2596.84	0.5	43	1362.86	0.043532	0.0354378	4.3532	3.54378	18.5937	0.0405603	0.0351432	3.51432	26	4.05603	0.715142
Glyptothorax_indicus	10687.9	0.6	201	7852.16	0.010777	0.00835538	1.0777	0.835538	22.4702	0.00878999	0.00803361	0.803361	308	0.878999	0.0729552
Glyptothorax_interspinalum	7354.64	0.6	1	97.25	1	1	100	100	0	1	1		0		0
Glyptothorax_irroratus	20953.9	0.7	57	2028.78	0.0462013	0.0324424	4.62013	3.24424	29.7804	0.0411347	0.0320231	3.20231	40	4.11347	0.744509
Glyptothorax_lampris	9010.98	0.6	497	21126.6	0.00430472	0.00325704	0.430472	0.325704	24.3379	0.00339438	0.00315745	0.315745	887	0.339438	0.0274384
Glyptothorax_laosensis	8325.18	0.6	988	42876.6	0.0021624	0.00146912	0.21624	0.146912	32.0609	0.00155561	0.00142015	0.142015	2944	0.155561	0.0108902
Glyptothorax_longicauda	5763.74	0.6	4	89.04	0.409259	0.25	40.9259	25	38.914	0.321796	0.25	25	58	32.1796	0.67093
Glyptothorax_longinema	6221.78	0.6	26	1291.61	0.0702091	0.0455805	7.02091	4.55805	35.079	0.0608028	0.0449191	4.49191	92	6.08028	0.381293
Glyptothorax_macromaculatus	9400.36	0.6	88	4129.28	0.0194563	0.0140131	1.94563	1.40131	27.9767	0.017587	0.0135897	1.35897	282	1.7587	0.0992083
Glyptothorax_platypogonides	6445.68	0.6	21	915.86	0.0955354	0.0852904	9.55354	8.52904	10.7238	0.088234	0.0789775	7.89775	42	8.8234	0.255328
Glyptothorax_porrectus	3821.7	0.5	3	245.57	0.334784	0.334759	33.4784	33.4759	0.00743657	0.334759	0.334759	33.4759	10	33.4759	0.000743657
Glyptothorax_sinensis	17593	0.7	12	525.85	0.174384	0.0833333	17.4384	8.33333	52.2128	0.145783	0.0833333	8.33333	97	14.5783	0.538276
Glyptothorax_trilineatus	32085.5	0.8	525	21188.3	0.00913084	0.00362208	0.913084	0.362208	60.3313	0.00406524	0.00337069	0.33707	1929	0.406524	0.031276
Glyptothorax_zanaensis	10304.9	0.6	81	3854.2	0.0198216	0.0150428	1.98216	1.50428	24.1089	0.0182669	0.0149188	1.49188	252	1.82669	0.0956703
Gobiobotia_yuanjiangensis	15382.9	0.7	15	566.78	0.127792	0.083419	12.7792	8.3419	34.7228	0.117901	0.0816971	8.16971	16	11.7901	2.17017
Gobiopsis_macrostomus	392.015	0.3	3	264.38	0.333333	0.333333	33.3333	33.3333	9.47817e-08	0.333333	0.333333	33.3333	1	33.3333	9.47817e-08
Gobiopterus_brachypterus	263.324	0.3	3	152.27	0.333333	0.333333	33.3333	33.3333	-1.03145e-07	0.333333	0.333333	33.3333	0	33.3333	0
Gobiopterus_chuno	1018.97	0.3	134	5828.81	0.0103381	0.00958161	1.03381	0.958161	7.31724	0.00958161	0.00940837	0.940836	177	0.958161	0.0413403
Gymnodanio_strigatus	2432.21	0.4	5	185.94	0.266215	0.2	26.6215	20	24.8726	0.202237	0.2	20	9	20.2237	2.76362
Gymnothorax_tile	3306.94	0.5	1	55.88	1	1	100	100	0	1	1		0		0
Gyrinocheilus_aymonieri	28012.7	0.8	267	12713.7	0.0140455	0.0103484	1.40455	1.03484	26.3225	0.0108732	0.00985536	0.985536	291	1.08732	0.0904553
Gyrinocheilus_pennocki	40963.6	0.8	242	10013.4	0.0178393	0.0121227	1.78393	1.21226	32.0452	0.0125363	0.0115712	1.15712	295	1.25363	0.108628
Halophryne_diemensis	4190.62	0.5	6	579.29	0.169988	0.168958	16.9988	16.8958	0.605985	0.168958	0.167838	16.7838	12	16.8958	0.0504988
Hampala_dispar	46077.7	0.8	408	17953.4	0.0112551	0.00593313	1.12551	0.593313	47.2847	0.00623917	0.00559403	0.559403	1108	0.623917	0.0426758
Hampala_macrolepidota	185111	0.9	694	29365.4	0.0183993	0.00522809	1.83993	0.522809	71.5854	0.00581335	0.00464805	0.464805	1999	0.581335	0.0358106
Haplochromis_niloticus	722.837	0.3	3	85.6	0.49237	0.49237	49.237	49.237	2.43991e-08	0.49237	0.49237	49.237	0	49.237	0
Harpadon_nehereus	5292.16	0.6	3	162.95	0.338459	0.338459	33.8459	33.8459	-8.28933e-09	0.338459	0.338459	33.8459	0	33.8459	0
Helicophagus_leptorhynchus	139337	0.9	293	12248.7	0.0326898	0.0161274	3.26898	1.61274	50.6654	0.0179576	0.01455	1.455	439	1.79576	0.115411
Helicophagus_waandersii	134837	0.9	79	3200.39	0.0859674	0.0723942	8.59674	7.23942	15.7888	0.0753579	0.0681649	6.81649	52	7.53579	0.303631
Helostoma_temminckii	33790.9	0.8	838	36668.9	0.00564891	0.0025548	0.564891	0.25548	54.7735	0.0027458	0.00236418	0.236418	2321	0.27458	0.0235991
Hemiarius_stormii	66708	0.8	48	2142.54	0.0661366	0.061364	6.61366	6.1364	7.21631	0.061364	0.061364	6.1364	22	6.1364	0.328014
Hemiarius_verrucosus	245641	0.9	27	1028.37	0.185083	0.185083	18.5083	18.5083	1.14215e-07	0.185083	0.185083	18.5083	0	18.5083	0
Hemibagrus_filamentus	96157.2	0.9	206	7989.69	0.0401719	0.0213235	4.01719	2.13235	46.9193	0.0230587	0.0199446	1.99446	225	2.30587	0.20853
Hemibagrus_guttatus	196293	0.9	18	740.56	0.330776	0.28764	33.0776	28.764	13.041	0.321913	0.276668	27.6668	2	32.1913	6.5205
Hemibagrus_microphthalmus	470609	0.9	30	954.65	0.21727	0.209884	21.727	20.9884	3.39963	0.209884	0.202274	20.2274	1	20.9884	3.39963
Hemibagrus_nemurus	91706	0.9	256	10671.9	0.0329903	0.0168019	3.29903	1.68019	49.0701	0.0188591	0.0157681	1.57681	417	1.88591	0.117674
Hemibagrus_pluriradiatus	23592.7	0.7	157	6246.09	0.0169484	0.0108483	1.69484	1.08483	35.9923	0.0120448	0.0105074	1.05074	307	1.20448	0.117239
Hemibagrus_spilopterus	76299.9	0.9	150	6646.33	0.0461518	0.0326144	4.61518	3.26144	29.3323	0.035143	0.0311117	3.11117	166	3.5143	0.1767
Hemibagrus_wyckii	208408	0.9	695	28762.3	0.0189939	0.00509686	1.89939	0.509686	73.1659	0.00561859	0.00452072	0.452072	2039	0.561859	0.0358832
Hemibagrus_wyckioides	296510	0.9	554	23448.2	0.0203681	0.00646258	2.03681	0.646258	68.271	0.00763694	0.00579737	0.579738	1415	0.763694	0.0482481
Hemibarbus_maculatus	100764	0.9	83	3179.77	0.0845943	0.042828	8.45943	4.2828	49.3725	0.0714486	0.0422677	4.22677	156	7.14486	0.31649
Hemibarbus_medius	2440.86	0.4	5	358.5	0.200735	0.2	20.0735	20	0.366003	0.200735	0.2	20	37	20.0735	0.00989197
Hemiculterella_macrolepis	17161.3	0.7	120	5107.36	0.0217528	0.0146625	2.17528	1.46625	32.5948	0.0171899	0.0141011	1.41011	182	1.71899	0.179093
Hemigobius_hoevenii	2212.95	0.4	3	193.68	0.333335	0.333335	33.3335	33.3335	1.94543e-08	0.333335	0.333335	33.3335	0	33.3335	0
Hemimyzon_confluens	1001.85	0.3	33	1231.72	0.0362692	0.0316162	3.62692	3.16162	12.8291	0.0344563	0.031347	3.1347	69	3.44563	0.18593
Hemimyzon_ecdyonuroides	1307.94	0.4	23	1172.93	0.0641024	0.0459767	6.41024	4.59767	28.2761	0.0559259	0.0459767	4.59767	59	5.59259	0.479256
Hemimyzon_elongatus	1946.6	0.4	49	2308.68	0.0278582	0.0224743	2.78582	2.24743	19.326	0.025993	0.0219619	2.19619	89	2.5993	0.217147
Hemimyzon_khonensis	1878.49	0.4	16	394.96	0.0976174	0.0976174	9.76174	9.76174	-4.11287e-07	0.0976174	0.0976174	9.76174	0	9.76174	0
Hemimyzon_papilio	1478.35	0.4	269	12547.8	0.00532018	0.0046548	0.532018	0.46548	12.5066	0.00489037	0.00454811	0.454811	435	0.489037	0.0287509
Hemimyzon_pengi	2126.02	0.4	112	4490.16	0.012952	0.0113946	1.2952	1.13946	12.0242	0.01204	0.0112472	1.12472	220	1.204	0.0546556
Hemimyzon_tchangi	1317.76	0.4	35	2002.39	0.0348642	0.0321223	3.48642	3.21223	7.86434	0.034662	0.0321223	3.21223	109	3.4662	0.0721499
Hemiramphus_far	60353.2	0.8	4	207.67	0.504632	0.282136	50.4632	28.2136	44.0908	0.282136	0.256427	25.6427	9	28.2136	4.89897
Hemisilurus_heterorhynchus	39640.1	0.8	11	719.17	0.190932	0.132922	19.0932	13.2922	30.3827	0.151284	0.132922	13.2922	50	15.1284	0.607655
Hemisilurus_mekongensis	103787	0.9	314	12229.5	0.0344785	0.0141108	3.44785	1.41108	59.0736	0.0164295	0.0126679	1.26679	523	1.64295	0.112951
Hemitrygon_laosensis	74767.6	0.8	82	2545.84	0.048488	0.0450242	4.8488	4.50242	7.14347	0.0464229	0.0446663	4.46663	23	4.64229	0.310586
Henicorhynchus_caudimaculatus	25213.3	0.7	524	21206.9	0.00580726	0.00355073	0.580726	0.355073	38.8571	0.00377499	0.00339803	0.339803	1274	0.377499	0.0305001
Henicorhynchus_entmema	22836.7	0.7	346	15505.5	0.00823029	0.00592383	0.823029	0.592383	28.024	0.00600439	0.00568189	0.568189	498	0.600439	0.0562731
Henicorhynchus_ornatipinnis	29684.4	0.8	549	22176.1	0.00848066	0.00413784	0.848066	0.413784	51.2085	0.00451217	0.00390253	0.390253	1150	0.451217	0.0445291
Henicorhynchus_siamensis	28604.5	0.8	492	22119.5	0.00859719	0.00476546	0.859719	0.476546	44.5696	0.00511235	0.00449756	0.449756	957	0.511235	0.0465722
Heteropneustes_fossilis	24044.4	0.7	618	24003.6	0.00500496	0.00259158	0.500496	0.259158	48.2198	0.00280259	0.00244972	0.244972	2081	0.280259	0.0231715
Heteropneustes_kemratensis	26649.2	0.7	11	428.51	0.216721	0.192613	21.6721	19.2613	11.124	0.192613	0.183967	18.3967	5	19.2613	2.2248
Hexanematichthys_sagor	17192	0.7	3	379.01	0.374022	0.362103	37.4022	36.2103	3.18654	0.362103	0.3462	34.62	6	36.2103	0.53109
Hilsa_kelee	3908.04	0.5	2	102.31	0.500416	0.500294	50.0416	50.0294	0.0243506	0.500294	0.500132	50.0132	1	50.0294	0.0243506
Himantura_undulata	1.51713e+06	0.9	6	198.39	0.62596	0.519676	62.596	51.9676	16.9793	0.519676	0.519676	51.9676	0	51.9676	16.9793
Hippichthys_heptagonus	6839.88	0.6	40	2291.88	0.043089	0.0362499	4.3089	3.62499	15.8719	0.0382037	0.0345822	3.45822	48	3.82037	0.330665
Hippichthys_penicillus	731.942	0.3	9	421.77	0.113668	0.111861	11.3668	11.1861	1.58968	0.111861	0.111194	11.1194	17	11.1861	0.0935103
Hippichthys_spicifer	2245.3	0.4	11	1064.57	0.0984089	0.0909091	9.84089	9.09091	7.62105	0.0909091	0.0909091	9.09091	43	9.09091	0.177234
Homaloptera_confuzona	4927.3	0.5	226	10865.5	0.00748815	0.00656909	0.748815	0.656909	12.2736	0.00658931	0.00644956	0.644956	243	0.658931	0.0505084
Homaloptera_orthogoniata	1252.45	0.4	6	212	0.241219	0.231451	24.1219	23.1451	4.04933	0.241219	0.231451	23.1451	1	24.1219	4.04933
Homalopteroides_lineatus	1642.6	0.4	5	88.86	0.367734	0.326184	36.7734	32.6184	11.2989	0.326184	0.32531	32.531	4	32.6184	2.82472
Homalopteroides_smithi	2709.25	0.5	815	35665.9	0.00216049	0.00163069	0.216049	0.163069	24.5224	0.00167469	0.00159036	0.159036	2285	0.167469	0.0107319
Homalopteroides_tweediei	1712.9	0.4	267	13259	0.00543381	0.00499918	0.543381	0.499918	7.99856	0.00500614	0.00492956	0.492955	287	0.500614	0.0278696
Homatula_acuticephala	626.014	0.3	1	160.47	1	1	100	100	0	1	1		18		0
Homatula_anguillioides	7426.48	0.6	24	1337.4	0.0615826	0.0426244	6.15826	4.26244	30.785	0.0595534	0.0423277	4.23277	88	5.95534	0.34983
Homatula_erhaiensis	999.853	0.3	1	160.47	1	1	100	100	0	1	1		18		0
Homatula_longibarbata	1468.14	0.4	3	176.72	0.333471	0.333333	33.3471	33.3333	0.0412865	0.333391	0.333333	33.3333	13	33.3391	0.00317588
Homatula_microcephala	2022.84	0.4	1	162.36	1	1	100	100	0	1	1		19		0
Homatula_pycnolepis	4657.46	0.5	24	1382.16	0.0591575	0.0449418	5.91575	4.49418	24.0303	0.0570201	0.0449418	4.49418	159	5.70201	0.151134
Homatula_variegata	5234.17	0.5	10	609.16	0.119318	0.1	11.9318	10	16.19	0.110666	0.1	10	123	11.0666	0.131626
Homatula_wuliangensis	11021.2	0.6	6	151.53	0.344135	0.172109	34.4135	17.2109	49.9881	0.316714	0.172109	17.2109	5	31.6714	9.99761
Hyporhamphus_limbatus	53448.7	0.8	52	2631.11	0.0632402	0.0583339	6.32402	5.83339	7.75828	0.0583339	0.057934	5.7934	33	5.83339	0.235099
Hyporhamphus_quoyi	55825.8	0.8	106	4636.31	0.0354411	0.029073	3.54411	2.9073	17.9681	0.029386	0.0281081	2.81081	82	2.9386	0.219123
Hypsibarbus_lagleri	102956	0.9	152	5739.94	0.0602474	0.0369838	6.02474	3.69838	38.6135	0.0417899	0.0341748	3.41748	80	4.17899	0.482669
Hypsibarbus_malcolmi	156890	0.9	270	12406.6	0.0361942	0.018316	3.61942	1.8316	49.3951	0.0208266	0.0166141	1.66141	429	2.08266	0.11514
Hypsibarbus_pierrei	59066.2	0.8	282	11380.1	0.0172068	0.00792904	1.72068	0.792904	53.919	0.0084237	0.00744623	0.744623	719	0.84237	0.0749917
Hypsibarbus_suvattii	26078.6	0.7	28	975.6	0.0855927	0.0824929	8.55927	8.24929	3.62152	0.0824929	0.0824929	8.24929	0	8.24929	3.62152
Hypsibarbus_vernayi	34778.7	0.8	392	15755	0.0118236	0.00664455	1.18236	0.664455	43.8028	0.00709457	0.00621602	0.621602	759	0.709457	0.0577112
Hypsibarbus_wetmorei	143725	0.9	196	7593.15	0.0463379	0.0263065	4.63379	2.63065	43.229	0.0296832	0.0244189	2.44189	160	2.96832	0.270181
Ichthyocampus_carce	10738.4	0.6	3	175.1	0.33621	0.33621	33.621	33.621	5.49238e-09	0.33621	0.33621	33.621	0	33.621	0
Ilisha_megaloptera	44286.2	0.8	12	455.7	0.236289	0.132606	23.6289	13.2606	43.8797	0.132606	0.123016	12.3016	9	13.2606	4.87552
Incisilabeo_behri	85238.4	0.9	268	10942.3	0.0373818	0.0194116	3.73818	1.94116	48.0722	0.0219047	0.0175863	1.75863	319	2.19047	0.150697
Indostomus_paradoxus	1287.78	0.4	4	183.3	0.272832	0.272832	27.2832	27.2832	-1.24469e-07	0.272832	0.272832	27.2832	0	27.2832	0
Indostomus_spinosus	1059.39	0.3	55	3068.51	0.026329	0.0250827	2.6329	2.50827	4.73341	0.0250827	0.0241521	2.41521	134	2.50827	0.0353239
Johnius_belangerii	24442.6	0.7	11	436.86	0.156988	0.146821	15.6988	14.6821	6.4762	0.146821	0.136271	13.6271	8	14.6821	0.809525
Johnius_borneensis	2018.16	0.4	4	282.81	0.250004	0.25	25.0004	25	0.00151766	0.25	0.25	25	13	25	0.000116743
Johnius_carouna	1621.02	0.4	1	14.48	1	1	100	100	0	1	1		0		0
Johnius_coitor	14149.2	0.7	3	379.01	0.374022	0.362103	37.4022	36.2103	3.18654	0.362103	0.3462	34.62	6	36.2103	0.53109
Johnius_trachycephalus	3932.51	0.5	12	938.75	0.0960261	0.0886956	9.60261	8.86956	7.63385	0.0886956	0.0851553	8.51553	31	8.86956	0.246253
Johnius_weberi	1280.31	0.4	2	131.99	0.500003	0.500003	50.0003	50.0003	2.91814e-08	0.500003	0.500003	50.0003	0	50.0003	0
Kryptopterus_bicirrhis	23378	0.7	578	24884	0.00514304	0.00293901	0.514304	0.293901	42.8546	0.00298398	0.00282015	0.282015	1841	0.298398	0.0232779
Kryptopterus_cryptopterus	14027	0.7	122	4264.98	0.0223465	0.0173207	2.23465	1.73207	22.4901	0.0175248	0.0168036	1.68036	105	1.75248	0.214192
Kryptopterus_dissitus	25543.2	0.7	50	2080.92	0.0457961	0.038938	4.57961	3.8938	14.9753	0.038938	0.0380439	3.80439	17	3.8938	0.880898
Kryptopterus_geminus	24600.9	0.7	539	22405.6	0.0055883	0.00310976	0.55883	0.310976	44.3523	0.00319514	0.00298391	0.298391	1791	0.319514	0.024764
Kryptopterus_limpok	15523.4	0.7	22	706.73	0.105177	0.104363	10.5177	10.4363	0.773758	0.104363	0.104363	10.4363	7	10.4363	0.110537
Kryptopterus_palembangensis	15336.8	0.7	11	177.73	0.33383	0.230321	33.383	23.0321	31.0064	0.230321	0.187467	18.7467	3	23.0321	10.3355
Kryptopterus_paraschilbeides	8972.36	0.6	43	1586.47	0.0434136	0.0421578	4.34136	4.21578	2.89246	0.0421578	0.0419864	4.19864	15	4.21578	0.192831
Kryptopterus_schilbeides	11732.7	0.6	1	127.91	1	1	100	100	0	1	1		0		0
Labeo_calbasu	133944	0.9	11	177.73	0.631993	0.317213	63.1993	31.7213	49.8075	0.317213	0.241515	24.1515	3	31.7213	16.6025
Labeo_chrysophekadion	181505	0.9	679	29359.1	0.0171835	0.00560877	1.71835	0.560877	67.3596	0.00650273	0.0049267	0.49267	1587	0.650273	0.0424446
Labeo_dyocheilus	127379	0.9	67	2279	0.0986058	0.0868169	9.86058	8.68169	11.9556	0.0868169	0.081757	8.1757	8	8.68169	1.49445
Labeo_erythropterus	223972	0.9	39	1594.42	0.16507	0.151818	16.507	15.1818	8.02836	0.160319	0.150491	15.0491	12	16.0319	0.66903
Labeo_indramontri	226041	0.9	88	4003.37	0.0850832	0.070245	8.50832	7.0245	17.4396	0.070245	0.0665604	6.65604	55	7.0245	0.317083
Labeo_pangusia	189294	0.9	6	168.83	0.650437	0.607987	65.0437	60.7987	6.52647	0.607987	0.551335	55.1335	1	60.7987	6.52647
Labeo_pierrei	437702	0.9	268	10912.2	0.0334227	0.0192508	3.34227	1.92508	42.4018	0.0244216	0.0182277	1.82277	224	2.44216	0.189294
Labiobarbus_leptocheilus	73202.6	0.8	696	30718.5	0.00672095	0.00310262	0.672095	0.310262	53.8366	0.00326537	0.00290154	0.290154	2015	0.326537	0.0267179
Labiobarbus_lineatus	21937.8	0.7	237	8891.15	0.0119702	0.00882666	1.19702	0.882666	26.2613	0.00925381	0.00861329	0.861329	316	0.925381	0.0831055
Labiobarbus_siamensis	26172.3	0.7	324	15179.6	0.00814687	0.00606958	0.814687	0.606958	25.498	0.00625925	0.00582881	0.582881	553	0.625925	0.0461086
Lagocephalus_sceleratus	59810.7	0.8	2	118.29	0.535696	0.501578	53.5696	50.1578	6.36902	0.501578	0.500001	50.0001	9	50.1578	0.707669
Laides_hexanema	16302.1	0.7	44	1283.67	0.0677531	0.0551977	6.77531	5.51977	18.5311	0.0596916	0.0512357	5.12357	12	5.96916	1.54426
Laides_longibarbis	43947.6	0.8	775	33058.8	0.00629508	0.00284895	0.629508	0.284895	54.7432	0.00308465	0.00266013	0.266013	2149	0.308465	0.0254738
Laocypris_hispida	2468.13	0.4	27	1154.81	0.0434408	0.0397734	4.34408	3.97734	8.44231	0.0411271	0.0388908	3.88908	46	4.11271	0.183528
Lates_calcarifer	169545	0.9	4	393.49	0.502409	0.444652	50.2409	44.4652	11.496	0.444652	0.379861	37.9861	6	44.4652	1.91601
Laubuka_caeruleostigmata	3448.92	0.5	535	22032.5	0.00334606	0.00248249	0.334606	0.248249	25.8086	0.00251371	0.00242961	0.242961	1775	0.251371	0.01454
Laubuka_laubuca	5601.83	0.6	77	2499.78	0.0271769	0.0253184	2.71769	2.53184	6.83848	0.0259598	0.0250443	2.50443	25	2.59598	0.273539
Leiodon_cutcutia	2174.43	0.4	2	153.96	0.5	0.5	50	50	6.52991e-05	0.5	0.5	50	6	50	1.08832e-05
Leiognathus_equula	20807.7	0.7	23	1943.3	0.0720867	0.059779	7.20867	5.9779	17.0734	0.059779	0.0541635	5.41634	47	5.9779	0.363265
Lepidocephalichthys_berdmorei	5784.9	0.6	306	14561.5	0.00655881	0.00553185	0.655881	0.553185	15.6578	0.00574817	0.00536391	0.536391	529	0.574817	0.0295988
Lepidocephalichthys_furcatus	2149.15	0.4	630	27252.8	0.00239454	0.00196472	0.239454	0.196472	17.9502	0.0019903	0.00193103	0.193103	1945	0.19903	0.00922888
Lepidocephalichthys_hasselti	2730.09	0.5	976	42433.2	0.00179181	0.00136756	0.179181	0.136756	23.6769	0.0014138	0.00133231	0.133231	2697	0.14138	0.00877898
Lepidocephalichthys_kranos	1376.29	0.4	23	922.43	0.0622946	0.051186	6.22946	5.1186	17.8324	0.051186	0.0479671	4.79671	50	5.1186	0.356648
Lepidocephalichthys_micropogon	240.936	0.3	4	100.61	0.262811	0.25	26.2811	25	4.87445	0.25	0.25	25	16	25	0.304653
Lepidocephalichthys_zeppelini	320.04	0.3	22	993.42	0.0586682	0.0513083	5.86682	5.13083	12.5449	0.0513083	0.0494371	4.94371	97	5.13083	0.129329
Lepidocephalus_macrochir	1711.9	0.4	27	876.72	0.0615726	0.0381732	6.15726	3.81732	38.0029	0.0381732	0.0372648	3.72648	93	3.81732	0.408633
Leptobarbus_hoevenii	240622	0.9	108	4081.43	0.0715006	0.051938	7.15006	5.1938	27.3601	0.051938	0.0490605	4.90605	78	5.1938	0.35077
Leptobarbus_rubripinna	293345	0.9	148	6768.42	0.0676841	0.0380597	6.76841	3.80597	43.7687	0.039876	0.0342613	3.42613	162	3.9876	0.270177
Lepturacanthus_savala	86480.4	0.9	3	379.01	0.478475	0.428496	47.8475	42.8496	10.4454	0.428496	0.375891	37.5891	6	42.8496	1.7409
Lobocheilos_bo	56039.5	0.8	4	141.12	0.508805	0.508805	50.8805	50.8805	-1.17705e-08	0.508805	0.508805	50.8805	0	50.8805	0
Lobocheilos_falcifer	35565	0.8	2	117.06	0.706498	0.706498	70.6498	70.6498	1.3078e-08	0.706498	0.706498	70.6498	0	70.6498	0
Lobocheilos_rhabdoura	32528.1	0.8	426	18633.6	0.0105077	0.00620122	1.05077	0.620122	40.9839	0.00666525	0.00581016	0.581016	750	0.666525	0.0546452
Lobotes_surinamensis	48032.4	0.8	7	580.97	0.268633	0.175955	26.8633	17.5955	34.4998	0.175955	0.148529	14.8529	22	17.5955	1.56817
Longiculter_siahi	24849.8	0.7	27	1429.92	0.0845018	0.0744307	8.45018	7.44307	11.9182	0.0744307	0.0744307	7.44307	31	7.44307	0.384457
Luciocyprinus_langsoni	9361.98	0.6	1	70.75	1	1	100	100	0	1	1		23		0
Luciocyprinus_striolatus	422707	0.9	150	5623.19	0.069671	0.0276855	6.9671	2.76855	60.2625	0.0390727	0.0259439	2.59439	255	3.90727	0.236324
Luciosoma_bleekeri	36266.4	0.8	261	11829.5	0.0161182	0.0100079	1.61182	1.00079	37.9091	0.0105067	0.00942085	0.942085	449	1.05067	0.0844302
Luciosoma_setigerum	35356.4	0.8	152	7936.75	0.0233245	0.0182988	2.33245	1.82988	21.5471	0.018631	0.0169675	1.69675	143	1.8631	0.150679
Lutjanus_argentimaculatus	366383	0.9	6	541.82	0.409138	0.323026	40.9138	32.3026	21.0472	0.323026	0.271268	27.1268	10	32.3026	2.10472
Lutjanus_russellii	44152.9	0.8	7	580.97	0.268633	0.175955	26.8633	17.5955	34.4998	0.175955	0.148529	14.8529	22	17.5955	1.56817
Lycothrissa_crocodilus	46154.7	0.8	97	5017.88	0.0391109	0.0327804	3.91109	3.27804	16.1861	0.0333494	0.0317206	3.17206	99	3.33494	0.163495
Macrochirichthys_macrochirus	182163	0.9	999	43625.7	0.0125054	0.00327813	1.25054	0.327813	73.7863	0.00408878	0.00287467	0.287467	2874	0.408878	0.0256737
Macrognathus_aculeatus	24397.8	0.7	216	9439.08	0.0119824	0.00862078	1.19824	0.862078	28.0545	0.00911869	0.00815819	0.815819	336	0.911869	0.0834956
Macrognathus_circumcinctus	25052.5	0.7	558	23735.2	0.00509361	0.00327932	0.509361	0.327932	35.619	0.00342146	0.00312648	0.312648	1111	0.342146	0.0320603
Macrognathus_maculatus	23727.2	0.7	220	10083.6	0.0118243	0.00935758	1.18243	0.935758	20.8617	0.00939095	0.00895104	0.895104	290	0.939095	0.071937
Macrognathus_meklongensis	12674.1	0.7	6	127.38	0.376263	0.367698	37.6263	36.7698	2.2763	0.367698	0.356268	35.6268	1	36.7698	2.2763
Macrognathus_semiocellatus	16511.1	0.7	319	13578.5	0.00895675	0.00587606	0.895675	0.587606	34.3952	0.00596674	0.00565541	0.565541	648	0.596674	0.053079
Macrognathus_siamensis	34515	0.8	298	13100	0.0139902	0.00836432	1.39902	0.836432	40.2131	0.00883128	0.00792776	0.792776	587	0.883128	0.0685061
Macropodus_opercularis	3003.64	0.5	24	1334.36	0.0534784	0.045189	5.34784	4.5189	15.5005	0.0481199	0.0450437	4.50437	88	4.81199	0.176143
Macrotrema_caligans	88365.1	0.9	2	299.12	0.521393	0.5	52.1393	50	4.10305	0.5	0.5	50	9	50	0.455894
Maculabatis_gerrardi	534269	0.9	3	379.01	0.478475	0.428496	47.8475	42.8496	10.4454	0.428496	0.375891	37.5891	6	42.8496	1.7409
Mastacembelus_armatus	117899	0.9	345	15114	0.0254598	0.0126726	2.54598	1.26726	50.2249	0.0152933	0.0115754	1.15754	482	1.52933	0.104201
Mastacembelus_erythrotaenia	144817	0.9	111	5896.56	0.0804388	0.049298	8.04388	4.9298	38.7137	0.0493644	0.0446525	4.46525	128	4.93644	0.302451
Mastacembelus_favus	92327.1	0.9	523	21976	0.0221731	0.00787345	2.21731	0.787345	64.491	0.00892686	0.00699144	0.699144	1050	0.892686	0.06142
Mastacembelus_unicolor	65211.6	0.8	3	78.7	0.581739	0.333333	58.1739	33.3333	42.7006	0.333333	0.333333	33.3333	9	33.3333	4.74451
Megalops_cyprinoides	211242	0.9	57	2534.12	0.120231	0.0947003	12.0231	9.47003	21.2345	0.0947003	0.0865231	8.65231	34	9.47003	0.624545
Mekongina_bibarba	19058.6	0.7	14	748.08	0.191249	0.0714286	19.1249	7.14286	62.6515	0.124456	0.0714286	7.14286	64	12.4456	0.978929
Mekongina_erythrospila	85989.9	0.9	218	8535.19	0.0416199	0.0236335	4.16199	2.36335	43.2158	0.0271506	0.0219086	2.19086	181	2.71506	0.238761
Mekongina_lancangensis	1024.75	0.3	7	306.04	0.189667	0.172129	18.9667	17.2129	9.24641	0.177005	0.159601	15.9601	14	17.7005	0.660458
Metzia_bounthobi	2895.71	0.5	8	146.88	0.242839	0.179864	24.2839	17.9864	25.933	0.242839	0.179864	17.9864	3	24.2839	8.64433
Metzia_lineata	3574.68	0.5	4	178.96	0.3598	0.25	35.98	25	30.5169	0.25	0.25	25	9	25	3.39077
Microcobitis_misgurnoides	859.487	0.3	5	300.92	0.20043	0.200186	20.043	20.0186	0.121529	0.200228	0.200037	20.0037	10	20.0228	0.0121529
Micronema_cheveyi	21509.9	0.7	153	6240.53	0.0169588	0.0154715	1.69588	1.54715	8.77039	0.0159172	0.0153483	1.53483	108	1.59172	0.0812073
Micronema_hexapterus	2062.26	0.4	1	55.88	1	1	100	100	0	1	1		0		0
Microphis_boaja	11807.5	0.6	284	13060.2	0.0072495	0.00576608	0.72495	0.576608	20.4623	0.0057762	0.00558987	0.558987	611	0.57762	0.0334898
Microphis_brachyurus	12885.7	0.7	101	5760.67	0.0238499	0.0173121	2.38499	1.73121	27.4125	0.0173185	0.0166793	1.66793	150	1.73185	0.18275
Microphis_contiguus	12683.7	0.7	365	14946.3	0.00803574	0.00473829	0.803574	0.473829	41.0348	0.00491259	0.00450904	0.450904	1235	0.491259	0.0332265
Microphis_deokhatoides	7492.29	0.6	132	6080.11	0.0156741	0.0123373	1.56741	1.23373	21.2888	0.0123381	0.0120449	1.20449	176	1.23381	0.120959
Microphis_martensii	1771.94	0.4	4	270.24	0.262118	0.262118	26.2118	26.2118	-8.24084e-08	0.262118	0.262118	26.2118	0	26.2118	0
Minyclupeoides_dentibranchialus	1156.54	0.4	68	3281.1	0.0203697	0.0195482	2.03697	1.95482	4.03304	0.019627	0.0194537	1.94537	39	1.9627	0.103411
Misgurnus_anguillicaudatus	17648.1	0.7	87	4747.07	0.0221277	0.0149789	2.21277	1.49789	32.3069	0.0191961	0.0146576	1.46576	317	1.91961	0.101915
Monopterus_albus	216146	0.9	1028	44862.8	0.0121906	0.00316224	1.21906	0.316224	74.0599	0.00394008	0.00276455	0.276454	2986	0.394008	0.0248024
Monopterus_javanensis	88383.4	0.9	9	585.78	0.277516	0.153366	27.7516	15.3366	44.7362	0.161127	0.138987	13.8987	17	16.1127	2.63154
Moolgarda_cunnesius	21666.6	0.7	5	462.68	0.28248	0.228779	28.248	22.8779	19.0106	0.228779	0.205736	20.5736	13	22.8779	1.46235
Mugil_cephalus	110964	0.9	19	1409.25	0.340654	0.190896	34.0654	19.0896	43.9619	0.190896	0.137174	13.7174	38	19.0896	1.15689
Mugilogobius_cavifrons	101.115	0.3	3	175.1	0.333338	0.333338	33.3338	33.3338	-1.16308e-08	0.333338	0.333338	33.3338	0	33.3338	0
Mugilogobius_chulae	1185.47	0.4	41	2595.96	0.0308345	0.0294819	3.08345	2.94819	4.3868	0.0294819	0.0291243	2.91243	50	2.94819	0.0877361
Mugilogobius_tigrinus	182.95	0.3	4	307.49	0.250003	0.250003	25.0003	25.0003	2.24006e-08	0.250003	0.250003	25.0003	1	25.0003	2.24006e-08
Mustura_bella	228.141	0.3	4	138.12	0.306424	0.250062	30.6424	25.0062	18.3935	0.250062	0.250028	25.0028	13	25.0062	1.41488
Mystacoleucus_atridorsalis	8472.33	0.6	385	15752	0.00570411	0.00381433	0.570411	0.381433	33.1302	0.00390921	0.00368703	0.368702	1158	0.390921	0.0286099
Mystacoleucus_chilopterus	15768.3	0.7	453	16843.1	0.00698621	0.00350347	0.698621	0.350347	49.8517	0.00372775	0.00336751	0.336751	1764	0.372775	0.0282606
Mystacoleucus_ectypus	8537.13	0.6	121	4798.62	0.0179361	0.0131191	1.79361	1.31191	26.8565	0.0133958	0.012438	1.2438	240	1.33958	0.111902
Mystacoleucus_greenwayi	5303.13	0.6	105	3454	0.0229473	0.0181839	2.29473	1.81839	20.7582	0.0186716	0.0174815	1.74815	171	1.86716	0.121393
Mystacoleucus_lepturus	11587.2	0.6	173	6782.4	0.0125458	0.00903039	1.25458	0.903039	28.0207	0.00990055	0.00863853	0.863853	368	0.990055	0.0761433
Mystacoleucus_obtusirostris	7114.7	0.6	966	41750.1	0.00221541	0.00150462	0.221541	0.150462	32.0838	0.00158482	0.00145265	0.145265	2750	0.158482	0.0116668
Mystus_albolineatus	38058.1	0.8	157	6709.24	0.0252955	0.0188245	2.52955	1.88245	25.5813	0.0192472	0.0179745	1.79745	128	1.92472	0.199854
Mystus_atrifasciatus	10889.1	0.6	340	14607.6	0.00622711	0.00476215	0.622711	0.476215	23.5255	0.00488138	0.0046346	0.46346	580	0.488138	0.0405611
Mystus_bocourti	48177.9	0.8	102	4318.04	0.0369203	0.0281905	3.69203	2.81905	23.6449	0.0291324	0.0269752	2.69752	128	2.91324	0.184726
Mystus_cavasius	61306.2	0.8	81	2469.32	0.0475332	0.0395601	4.75332	3.95601	16.7739	0.0414121	0.0372728	3.72728	23	4.14121	0.729299
Mystus_gulio	93731.4	0.9	12	534.97	0.302086	0.255683	30.2086	25.5683	15.3609	0.255683	0.229334	22.9334	10	25.5683	1.53609
Mystus_multiradiatus	9213.43	0.6	488	21315.7	0.00433086	0.00312917	0.433086	0.312917	27.7472	0.00318558	0.00303728	0.303728	1035	0.318558	0.0268089
Mystus_mysticetus	7436.87	0.6	281	11585.8	0.00747137	0.00580375	0.747137	0.580375	22.3202	0.00590088	0.00569503	0.569503	427	0.590088	0.0522721
Mystus_nigriceps	28452.6	0.8	38	881.94	0.119336	0.0810186	11.9336	8.10186	32.1091	0.0810186	0.0756219	7.56219	30	8.10186	1.0703
Mystus_rhegma	9308.52	0.6	208	8786.76	0.0098149	0.00791381	0.98149	0.791381	19.3695	0.00819951	0.00765495	0.765495	310	0.819951	0.0624822
Mystus_singaringan	71289.8	0.8	714	30495.9	0.00670456	0.00299263	0.670456	0.299263	55.3643	0.00318458	0.00278611	0.278611	2039	0.318458	0.0271527
Mystus_velifer	9472.55	0.6	24	851.42	0.0748515	0.0739625	7.48515	7.39625	1.18761	0.0739625	0.0731789	7.31789	24	7.39625	0.0494838
Mystus_vittatus	51580.8	0.8	76	2528.92	0.0459319	0.0417056	4.59319	4.17056	9.20122	0.0437942	0.0405222	4.05222	15	4.37942	0.613415
Mystus_wolffii	19595	0.7	64	3267.74	0.0358649	0.0322755	3.58649	3.22755	10.0082	0.0328658	0.0316719	3.16719	59	3.28658	0.16963
Nandus_nandus	17082.9	0.7	85	2528.7	0.0335996	0.0247309	3.35996	2.47309	26.3953	0.025413	0.023416	2.3416	73	2.5413	0.361579
Nandus_nebulosus	9039.62	0.6	4	183.3	0.310286	0.310286	31.0286	31.0286	8.80154e-09	0.310286	0.310286	31.0286	0	31.0286	0
Nandus_oxyrhynchus	6008.1	0.6	513	22043.9	0.00413464	0.00295567	0.413464	0.295567	28.5145	0.00302563	0.0028673	0.28673	1214	0.302563	0.0234881
Nemacheilus_arenicolus	1715.07	0.4	7	521.29	0.143791	0.1432	14.3791	14.32	0.41104	0.14337	0.142926	14.2926	13	14.337	0.0316185
Nemacheilus_argyrogaster	4595.24	0.5	17	712.41	0.09894	0.0930287	9.894	9.30287	5.97465	0.0930287	0.0930287	9.30287	19	9.30287	0.314455
Nemacheilus_banar	2871.45	0.5	9	615.95	0.167074	0.111111	16.7074	11.1111	33.4958	0.16242	0.111111	11.1111	42	16.242	0.797519
Nemacheilus_binotatus	919.092	0.3	10	467.78	0.143922	0.103019	14.3922	10.3019	28.4205	0.103019	0.100368	10.0368	22	10.3019	1.29184
Nemacheilus_longistriatus	9682.01	0.6	244	10031.1	0.00861004	0.00667049	0.861004	0.667049	22.5267	0.00687507	0.00653219	0.653219	406	0.687507	0.0554844
Nemacheilus_masyae	8500.59	0.6	71	2270.22	0.0327287	0.026525	3.27287	2.6525	18.9552	0.026525	0.0257548	2.57548	66	2.6525	0.2872
Nemacheilus_pallidus	9565.34	0.6	184	6967.68	0.0116538	0.00895242	1.16538	0.895242	23.1804	0.00924265	0.00867887	0.867887	200	0.924265	0.115902
Nemacheilus_pezidion	4231.47	0.5	1	41.4	1	1	100	100	0	1	1		0		0
Nemacheilus_platiceps	2965.82	0.5	272	12465.2	0.00604462	0.00526924	0.604462	0.526924	12.8276	0.00535089	0.00511764	0.511764	414	0.535089	0.0309845
Nemacheilus_zonatus	3151.76	0.5	11	168.31	0.149697	0.127837	14.9697	12.7837	14.6028	0.127837	0.113893	11.3893	20	12.7837	0.73014
Neobarynotus_microlepis	32655.2	0.8	63	3350.96	0.0557577	0.0460678	5.57577	4.60678	17.3786	0.0460678	0.0440092	4.40092	69	4.60678	0.251863
Neodontobutis_aurarmus	2817.81	0.5	131	5177.37	0.0130864	0.0116963	1.30864	1.16963	10.6225	0.0117471	0.0113885	1.13885	123	1.17471	0.0863616
Neolissochilus_benasi	2424.61	0.4	5	123.5	0.249022	0.204758	24.9022	20.4758	17.775	0.239194	0.204758	20.4758	3	23.9194	5.925
Neolissochilus_blanci	42592	0.8	594	25499.7	0.00762	0.00405533	0.762	0.405533	46.7805	0.00456458	0.00376052	0.376052	999	0.456458	0.0468273
Neolissochilus_nigrovittatus	2826.84	0.5	12	292.85	0.156201	0.110256	15.6201	11.0256	29.4142	0.110256	0.1042	10.42	18	11.0256	1.63412
Neolissochilus_stracheyi	42250.5	0.8	17	561.41	0.128839	0.096018	12.8839	9.6018	25.4745	0.116647	0.096018	9.6018	15	11.6647	1.6983
Neolissochilus_wynaadensis	25514.7	0.7	2	61.95	0.571599	0.5	57.1599	50	12.5261	0.571599	0.5	50	1	57.1599	12.5261
Neopomacentrus_taeniurus	2074.81	0.4	22	1442.86	0.0488697	0.0470783	4.88697	4.70783	3.66577	0.0470783	0.0461645	4.61645	39	4.70783	0.093994
Neosalanx_brevirostris	442.803	0.3	5	192.28	0.305966	0.305953	30.5966	30.5953	0.00413454	0.305953	0.305953	30.5953	8	30.5953	0.000516817
Neostethus_bicornis	715.021	0.3	261	9352.1	0.00540741	0.00421375	0.540741	0.421375	22.0745	0.00423778	0.00412649	0.412649	1404	0.423778	0.0157226
Neostethus_lankesteri	418.943	0.3	15	919.94	0.0682686	0.0672529	6.82686	6.72529	1.48783	0.0672529	0.066801	6.6801	21	6.72529	0.0708488
Netuma_thalassina	694772	0.9	21	955.78	0.26999	0.256426	26.999	25.6426	5.02399	0.256426	0.24	24	7	25.6426	0.717714
Nibea_soldado	99039.3	0.9	13	817.98	0.368976	0.231283	36.8976	23.1283	37.3178	0.231283	0.172636	17.2636	23	23.1283	1.62251
Notopterus_notopterus	74398.5	0.8	879	37604.6	0.00549258	0.00241446	0.549258	0.241446	56.0414	0.00264881	0.00223352	0.223352	2409	0.264881	0.0232633
Nuchequula_gerreoides	2042.08	0.4	1	68.29	1	1	100	100	0	1	1		6		0
Oligolepis_acutipennis	8298.15	0.6	16	910.92	0.103831	0.102078	10.3831	10.2078	1.68831	0.102078	0.0999814	9.99814	14	10.2078	0.120594
Omobranchus_ferox	1310.93	0.4	13	1163.23	0.0882484	0.0881857	8.82484	8.81857	0.0710469	0.0881857	0.0881377	8.81377	23	8.81857	0.003089
Omox_biporos	120.985	0.3	6	743.63	0.217855	0.217855	21.7855	21.7855	3.5856e-06	0.217855	0.217855	21.7855	11	21.7855	3.25963e-07
Ompok_bimaculatus	42571.3	0.8	214	8295.23	0.0192377	0.012117	1.92377	1.2117	37.0143	0.0129307	0.0116754	1.16754	331	1.29307	0.111826
Ompok_eugeneiatus	18332.1	0.7	29	1425.85	0.0799049	0.0733527	7.99049	7.33527	8.20002	0.0733527	0.0733527	7.33527	22	7.33527	0.372728
Ompok_hypophthalmus	88406.5	0.9	54	2327.8	0.117967	0.0971858	11.7967	9.71858	17.6163	0.0971858	0.0961327	9.61327	27	9.71858	0.652456
Ompok_pinnatus	8752.21	0.6	40	1925.16	0.0447393	0.0429841	4.47393	4.29841	3.92333	0.0429841	0.042586	4.2586	38	4.29841	0.103246
Ompok_siluroides	30354.4	0.8	850	36498.8	0.00564876	0.00248235	0.564876	0.248235	56.0549	0.00270158	0.00229821	0.229821	2354	0.270158	0.0238126
Ompok_urbaini	19143.5	0.7	592	25787.6	0.004887	0.00290189	0.4887	0.290189	40.6202	0.00297483	0.00276224	0.276224	1592	0.297483	0.0255152
Onychostoma_fangi	9760.97	0.6	12	745.65	0.118007	0.0992899	11.8007	9.92899	15.8607	0.105449	0.0992899	9.92899	54	10.5449	0.293717
Onychostoma_fusiforme	36458.6	0.8	239	9576.23	0.0191293	0.00981425	1.91293	0.981425	48.6953	0.0122282	0.00907589	0.907589	431	1.22282	0.112982
Onychostoma_gerlachi	30301.7	0.8	115	5348.55	0.0317091	0.0177896	3.17091	1.77896	43.8975	0.025753	0.0172986	1.72986	245	2.5753	0.179174
Onychostoma_lini	37867	0.8	1	53.46	1	1	100	100	0	1	1		2		0
Onychostoma_meridionale	25463.7	0.7	212	9641.36	0.0121615	0.00992537	1.21615	0.992537	18.3872	0.010377	0.00951349	0.951349	254	1.0377	0.0723906
Onychostoma_ovale	15688.8	0.7	5	212.8	0.360504	0.2	36.0504	20	44.5221	0.213019	0.2	20	13	21.3019	3.42478
Onychostoma_simum	15045.3	0.7	17	588.29	0.119901	0.072898	11.9901	7.2898	39.2015	0.0797802	0.0684359	6.84359	83	7.97802	0.472307
Ophichthus_rutidoderma	29520.4	0.8	33	2270.51	0.10559	0.0765785	10.559	7.65785	27.4758	0.0765785	0.0640977	6.40977	49	7.65785	0.56073
Ophiocara_porocephala	29652.4	0.8	41	2433.11	0.0966726	0.0730798	9.66726	7.30798	24.4048	0.0730798	0.0642628	6.42628	50	7.30798	0.488096
Ophisternon_bengalense	214624	0.9	97	3508.58	0.0692678	0.0583634	6.92678	5.83634	15.7424	0.0603592	0.0563437	5.63437	38	6.03592	0.414273
Opsariichthys_bidens	19964.8	0.7	215	8902.69	0.012416	0.00868014	1.2416	0.868014	30.0893	0.0100731	0.00827141	0.827141	374	1.00731	0.0804527
Opsarius_barna	10531.6	0.6	8	537.22	0.155688	0.138377	15.5688	13.8377	11.119	0.140771	0.138377	13.8377	48	14.0771	0.231645
Opsarius_caudiocellatus	11652.2	0.6	46	2564.2	0.0331929	0.0246439	3.31929	2.46439	25.7557	0.0305675	0.0240525	2.40525	183	3.05675	0.140742
Opsarius_koratensis	9407	0.6	519	22764	0.0039541	0.00308892	0.39541	0.308892	21.8806	0.00321289	0.00299597	0.299597	873	0.321289	0.0250637
Opsarius_ornatus	9793.17	0.6	529	22594.5	0.00383657	0.00292099	0.383657	0.292099	23.8646	0.00306379	0.00283422	0.283422	1078	0.306379	0.0221378
Opsarius_pulchellus	9715.83	0.6	740	32521.9	0.00283686	0.0020352	0.283686	0.20352	28.2587	0.00214744	0.00196232	0.196232	1761	0.214744	0.016047
Oreichthys_parvus	304.892	0.3	8	622.03	0.12775	0.127687	12.775	12.7687	0.048938	0.127687	0.127615	12.7615	13	12.7687	0.00376447
Oreoglanis_delacouri	6171.7	0.6	43	1946.08	0.0379857	0.0264127	3.79857	2.64127	30.4668	0.0325396	0.0256609	2.56609	135	3.25396	0.22568
Oreoglanis_frenata	3014.4	0.5	5	127.06	0.328669	0.325848	32.8669	32.5848	0.85815	0.325848	0.323592	32.3592	2	32.5848	0.429075
Oreoglanis_hypsiura	2096.26	0.4	3	290.24	0.333539	0.333333	33.3539	33.3333	0.0616899	0.333479	0.333333	33.3333	4	33.3479	0.0154225
Oreoglanis_jingdongensis	5589.31	0.6	11	689.92	0.103775	0.0954681	10.3775	9.54681	8.00498	0.102712	0.094056	9.4056	29	10.2712	0.276034
Oreoglanis_lepturus	3079.08	0.5	6	377.17	0.170841	0.167929	17.0841	16.7929	1.70476	0.168992	0.166919	16.6919	11	16.8992	0.154978
Oreoglanis_macronemus	902.974	0.3	25	952.78	0.044197	0.0408596	4.4197	4.08596	7.55119	0.0419853	0.0402969	4.02969	58	4.19853	0.130193
Oreoglanis_setigera	5555.74	0.6	82	4145.94	0.021181	0.0152474	2.1181	1.52474	28.0136	0.0179236	0.0149403	1.49403	367	1.79236	0.0763313
Oreoglanis_suraswadii	401.948	0.3	7	322.77	0.224976	0.224827	22.4976	22.4827	0.0661184	0.224827	0.224827	22.4827	14	22.4827	0.00472274
Oryzias_haugiangensis	804.814	0.3	25	1482.11	0.0468929	0.0456526	4.68929	4.56526	2.64484	0.0456526	0.0455344	4.55344	30	4.56526	0.0881612
Oryzias_javanicus	1162.82	0.4	5	282.9	0.259193	0.241932	25.9193	24.1932	6.65968	0.241932	0.218963	21.8963	5	24.1932	1.33194
Oryzias_latipes	1075.07	0.3	9	650.19	0.12074	0.111111	12.074	11.1111	7.97474	0.12074	0.111111	11.1111	42	12.074	0.189875
Oryzias_mekongensis	718.312	0.3	402	15659.9	0.00344809	0.00291819	0.344809	0.291819	15.3677	0.00294747	0.00287551	0.287551	1613	0.294747	0.00952742
Oryzias_minutillus	543.333	0.3	49	2429.07	0.0274136	0.0231744	2.74136	2.31744	15.4637	0.0231762	0.0224303	2.24303	209	2.31762	0.0739891
Oryzias_pectoralis	284.063	0.3	5	311.04	0.200397	0.200186	20.0397	20.0186	0.105006	0.200195	0.200037	20.0037	9	20.0195	0.0116673
Oryzias_sinensis	1138.88	0.4	302	13014.2	0.0049313	0.00421752	0.49313	0.421752	14.4745	0.00438027	0.00413002	0.413002	881	0.438027	0.0164297
Oryzias_songkhramensis	503.049	0.3	48	1615.84	0.0277193	0.0233268	2.77193	2.33268	15.8465	0.0244124	0.0227637	2.27637	91	2.44124	0.174137
Osphronemus_exodon	87485	0.9	378	17682.4	0.0285288	0.0114692	2.85288	1.14692	59.7978	0.0127623	0.0102207	1.02207	611	1.27623	0.0978687
Osphronemus_goramy	141806	0.9	172	8290.59	0.0516584	0.0306398	5.16584	3.06398	40.6876	0.0322841	0.0276478	2.76478	146	3.22841	0.278682
Osteochilus_brachynotopteroides	9399.52	0.6	24	695.33	0.101731	0.0504989	10.1731	5.04989	50.3604	0.0533027	0.0486984	4.86984	77	5.33027	0.654031
Osteochilus_lini	13201.9	0.7	314	12971.7	0.00890088	0.00642589	0.890088	0.642589	27.8061	0.00664667	0.00615219	0.615219	468	0.664667	0.0594148
Osteochilus_melanopleura	220047	0.9	339	15338.7	0.0311377	0.0140647	3.11377	1.40647	54.8306	0.0152172	0.012602	1.2602	578	1.52172	0.0948627
Osteochilus_microcephalus	31414.7	0.8	291	13540.6	0.014027	0.00985892	1.4027	0.985892	29.7146	0.010216	0.00920282	0.920282	343	1.0216	0.0866316
Osteochilus_schlegelii	51304.9	0.8	256	11037.9	0.0179898	0.00889697	1.79898	0.889697	50.5444	0.00912455	0.00840064	0.840064	777	0.912455	0.0650507
Osteochilus_striatus	1443.92	0.4	8	622.03	0.130821	0.13056	13.0821	13.056	0.19955	0.13056	0.1303	13.03	13	13.056	0.01535
Osteochilus_vittatus	49701	0.8	543	23157.5	0.00845926	0.0045725	0.845926	0.45725	45.9468	0.00482738	0.00427779	0.427779	1334	0.482738	0.0344428
Osteochilus_waandersii	21937.5	0.7	398	17806.3	0.00704861	0.00450894	0.704861	0.450894	36.0309	0.00457927	0.00432525	0.432525	1056	0.457927	0.0341201
Osteogeneiosus_militaris	37919.5	0.8	17	625.37	0.166213	0.164584	16.6213	16.4584	0.980504	0.164584	0.164353	16.4353	6	16.4584	0.163417
Osteomugil_perusii	2633.04	0.5	1	85.67	1	1	100	100	0	1	1		0		0
Otolithes_ruber	133121	0.9	3	379.01	0.478475	0.428496	47.8475	42.8496	10.4454	0.428496	0.375891	37.5891	6	42.8496	1.7409
Oxuderces_dentatus	903.862	0.3	4	263.64	0.250068	0.250046	25.0068	25.0046	0.00916981	0.250046	0.25002	25.002	8	25.0046	0.00114623
Oxyeleotris_marmorata	72807.3	0.8	450	19865.4	0.00921508	0.00532618	0.921508	0.532618	42.2015	0.00562158	0.00490494	0.490494	773	0.562158	0.0545945
Oxyeleotris_siamensis	23791.3	0.7	11	751.63	0.144852	0.138912	14.4852	13.8912	4.10068	0.138912	0.132872	13.2872	12	13.8912	0.341723
Oxyeleotris_urophthalmus	29222.3	0.8	40	2274.22	0.100624	0.0761545	10.0624	7.61545	24.318	0.0761545	0.0668911	6.68911	46	7.61545	0.528652
Oxygaster_anomalura	33230.1	0.8	238	11140.5	0.0169281	0.0114999	1.69281	1.14999	32.0663	0.0117737	0.0108434	1.08434	246	1.17737	0.130351
Oxygaster_pointoni	16901.3	0.7	365	16889.1	0.00703025	0.00510869	0.703025	0.510869	27.3328	0.00529075	0.00490379	0.490379	625	0.529075	0.0437324
Oxyurichthys_microlepis	6190.21	0.6	7	352.02	0.212779	0.206595	21.2779	20.6595	2.90644	0.206595	0.198561	19.8561	8	20.6595	0.363305
Pampus_chinensis	67826.7	0.8	6	541.82	0.265242	0.236094	26.5242	23.6094	10.9891	0.236094	0.212747	21.2747	10	23.6094	1.09891
Pangasianodon_gigas	1.11141e+06	0.9	178	7299.92	0.0497186	0.0325766	4.97186	3.25766	34.4781	0.0335949	0.0293185	2.93185	177	3.35949	0.194791
Pangasianodon_hypophthalmus	1.25001e+06	0.9	596	24867.7	0.0218727	0.0059127	2.18727	0.59127	72.9677	0.00639665	0.00528078	0.528078	1826	0.639665	0.0399604
Pangasius_bocourti	526945	0.9	373	16497.8	0.0290978	0.0134614	2.90978	1.34614	53.7374	0.0153805	0.0120144	1.20144	579	1.53805	0.0928107
Pangasius_conchophilus	603940	0.9	332	15067.8	0.0306636	0.0146341	3.06636	1.46341	52.2754	0.0166425	0.0132	1.32	548	1.66425	0.0953931
Pangasius_djambal	228528	0.9	38	1306.23	0.147405	0.134751	14.7405	13.4751	8.58417	0.134751	0.132839	13.2839	14	13.4751	0.613155
Pangasius_elongatus	160019	0.9	338	15098.5	0.031262	0.0150333	3.1262	1.50333	51.912	0.0170816	0.0134747	1.34747	478	1.70816	0.108602
Pangasius_krempfi	420352	0.9	356	16158	0.0300623	0.0126888	3.00623	1.26888	57.7916	0.0144824	0.0112275	1.12275	601	1.44824	0.0961591
Pangasius_kunyit	27092.1	0.7	12	316.87	0.177922	0.148281	17.7922	14.8281	16.6597	0.148281	0.145423	14.5423	5	14.8281	3.33194
Pangasius_larnaudii	1.42388e+06	0.9	372	16592.1	0.0284555	0.0127305	2.84555	1.27305	55.2616	0.01432	0.0114037	1.14037	584	1.432	0.0946261
Pangasius_macronema	79562.1	0.9	645	27202	0.020142	0.00523232	2.0142	0.523232	74.0228	0.00594006	0.00465071	0.465071	1927	0.594006	0.0384135
Pangasius_mekongensis	752736	0.9	388	17199.4	0.0276283	0.0121662	2.76283	1.21662	55.9646	0.0137919	0.0108623	1.08623	585	1.37919	0.0956661
Pangasius_nasutus	592874	0.9	21	818.87	0.152318	0.132938	15.2318	13.2938	12.7236	0.141439	0.129197	12.9197	7	14.1439	1.81766
Pangasius_polyuranodon	319801	0.9	47	2026.99	0.125906	0.111965	12.5906	11.1965	11.073	0.111965	0.109189	10.9189	23	11.1965	0.481436
Pangasius_sabahensis	117826	0.9	9	691.23	0.3898	0.361015	38.98	36.1015	7.38464	0.361015	0.357002	35.7002	7	36.1015	1.05495
Pangasius_sanitwongsei	2.96414e+06	0.9	462	20365.6	0.0233816	0.00952323	2.33816	0.952323	59.2704	0.0111387	0.00856071	0.85607	734	1.11387	0.0807499
Pangio_anguillaris	5726.58	0.6	367	16559.5	0.00571695	0.00435898	0.571695	0.435898	23.7535	0.0044516	0.00424049	0.424049	862	0.44516	0.0275562
Pangio_fusca	3053.77	0.5	18	694.68	0.0833555	0.0787531	8.33555	7.87531	5.52138	0.0817425	0.0786409	7.86409	6	8.17425	0.92023
Pangio_longimanus	787.84	0.3	1	163.06	1	1	100	100	0	1	1		6		0
Pangio_mariarum	3048.64	0.5	1	26.36	1	1	100	100	0	1	1		1		0
Pangio_myersi	5099.93	0.5	89	3772.12	0.0175685	0.0164234	1.75685	1.64234	6.51762	0.0165141	0.0163205	1.63205	56	1.65141	0.116386
Pangio_oblonga	4406.28	0.5	808	34745.7	0.00219442	0.00168204	0.219442	0.168204	23.3493	0.00171296	0.00164159	0.164159	2243	0.171296	0.0104099
Pangio_piperata	2210.85	0.4	283	10706.3	0.00556942	0.00444889	0.556942	0.444889	20.1194	0.00447129	0.00437966	0.437966	1062	0.447129	0.0189448
Panna_microdon	3229.6	0.5	2	131.99	0.500053	0.500053	50.0053	50.0053	6.44632e-09	0.500053	0.500053	50.0053	0	50.0053	0
Pao_abei	7457.75	0.6	299	12432.9	0.0071177	0.0050842	0.71177	0.50842	28.5696	0.00521901	0.00491152	0.491152	674	0.521901	0.0423881
Pao_baileyi	10300.5	0.6	101	3528.15	0.0217476	0.0188469	2.17476	1.88469	13.3378	0.0195471	0.0182463	1.82463	49	1.95471	0.272199
Pao_barbatus	13884.3	0.7	10	222.31	0.225711	0.207763	22.5711	20.7763	7.95196	0.216737	0.207763	20.7763	2	21.6737	3.97598
Pao_brevirostris	7411.47	0.6	49	3212.83	0.0316751	0.0301225	3.16751	3.01225	4.90166	0.0301225	0.0295367	2.95367	72	3.01225	0.0680786
Pao_cochinchinensis	12189.7	0.6	308	14241.6	0.00644867	0.00537855	0.644867	0.537855	16.5944	0.00540851	0.00526532	0.526532	451	0.540851	0.0367946
Pao_leiurus	10616.9	0.6	178	6178.5	0.0124827	0.00999889	1.24827	0.999889	19.8981	0.0103004	0.00972062	0.972062	278	1.03004	0.0715758
Pao_palembangensis	15725.6	0.7	367	12620.6	0.00893636	0.00397052	0.893636	0.397052	55.5689	0.00408029	0.00381035	0.381035	1684	0.408029	0.0329982
Pao_suvattii	9710.93	0.6	111	4031.9	0.0199651	0.015262	1.99651	1.5262	23.5564	0.0159513	0.0144821	1.44821	168	1.59513	0.140216
Pao_turgidus	16573.7	0.7	170	6750.69	0.0157195	0.0115981	1.57195	1.15981	26.2185	0.0126824	0.0111198	1.11198	236	1.26824	0.111095
Papuligobius_ocellatus	6977.7	0.6	374	16794.9	0.0054457	0.00423665	0.54457	0.423665	22.202	0.00444864	0.00410428	0.410428	612	0.444864	0.0362778
Papuligobius_uniporus	1670.76	0.4	1	68.15	1	1	100	100	0	1	1		0		0
Parachela_maculicauda	3158.37	0.5	319	13431.5	0.0055359	0.00443515	0.55359	0.443515	19.8839	0.00445864	0.00434345	0.434345	662	0.445864	0.030036
Parachela_oxygastroides	31510.8	0.8	830	35141.6	0.00586559	0.00263378	0.586559	0.263378	55.0978	0.00287705	0.00244616	0.244616	2294	0.287705	0.0240182
Parachela_siamensis	17682.4	0.7	304	13065.7	0.00953329	0.00610521	0.953329	0.610521	35.959	0.00619507	0.00587743	0.587743	665	0.619507	0.0540737
Parachela_williaminae	16835.3	0.7	331	13894.7	0.00853176	0.00591076	0.853176	0.591076	30.7204	0.00610962	0.00568229	0.568229	610	0.610962	0.0503614
Paralaubuca_barroni	33725.7	0.8	535	21429.3	0.00897741	0.00413545	0.897741	0.413545	53.9349	0.00442487	0.00386489	0.386489	1446	0.442487	0.0372994
Paralaubuca_harmandi	44661.7	0.8	226	10812.8	0.0179001	0.0122073	1.79001	1.22073	31.8034	0.0125903	0.0114705	1.14705	351	1.25903	0.090608
Paralaubuca_riveroi	19958	0.7	412	18044.4	0.0068173	0.00442943	0.68173	0.442943	35.0266	0.0046228	0.00423963	0.423963	930	0.46228	0.037663
Paralaubuca_typus	25439.3	0.7	284	13323.6	0.00917708	0.00712061	0.917708	0.712061	22.4088	0.00723686	0.00686766	0.686766	425	0.723686	0.0527265
Parambassis_apogonoides	10429.8	0.6	408	17001.4	0.00546878	0.0035715	0.546878	0.35715	34.6929	0.00360123	0.00346937	0.346937	1454	0.360123	0.0238603
Parambassis_ranga	6811.97	0.6	67	2746.83	0.0290533	0.0251194	2.90533	2.51194	13.5404	0.0255663	0.0247588	2.47588	83	2.55663	0.163138
Parambassis_siamensis	5685.99	0.6	720	30462	0.00299521	0.00204853	0.299521	0.204853	31.6064	0.00210712	0.00198409	0.198409	2088	0.210712	0.0151372
Parambassis_wolffii	34533.6	0.8	478	20058.5	0.0101085	0.00487347	1.01085	0.487347	51.7882	0.00500074	0.00455683	0.455683	1334	0.500074	0.0388217
Paramugil_parmatus	47548.9	0.8	42	2484.54	0.0883923	0.0655566	8.83923	6.55566	25.8346	0.0662815	0.0572079	5.72079	50	6.62815	0.516692
Paraplagusia_bilineata	9833.62	0.6	4	447.3	0.263405	0.258012	26.3405	25.8012	2.04752	0.258012	0.253476	25.3476	12	25.8012	0.170627
Parapocryptes_serperaster	12341.6	0.6	9	740.62	0.135047	0.130529	13.5047	13.0529	3.34543	0.130529	0.124599	12.4599	8	13.0529	0.418178
Parasikukia_maculata	8747.47	0.6	77	2788.28	0.0268917	0.0239992	2.68917	2.39992	10.7559	0.0243916	0.0232746	2.32746	47	2.43916	0.228849
Parastromateus_niger	270131	0.9	4	457.86	0.418311	0.321435	41.8311	32.1435	23.1589	0.321435	0.274476	27.4476	10	32.1435	2.31589
Percocypris_regani	21517.4	0.7	12	738.04	0.120341	0.0833333	12.0341	8.33333	30.7521	0.118815	0.0833333	8.33333	45	11.8815	0.683379
Percocypris_retrodorsalis	21535	0.7	28	1414.61	0.0682105	0.0436169	6.82105	4.36169	36.0555	0.0631668	0.0424395	4.24395	74	6.31668	0.487237
Percocypris_tchangi	21601.3	0.7	63	3315.12	0.0326075	0.0200674	3.26075	2.00674	38.4579	0.027791	0.0198431	1.9843	213	2.7791	0.180554
Periophthalmodon_freycineti	3206.66	0.5	1	68.29	1	1	100	100	0	1	1		6		0
Periophthalmodon_schlosseri	3227.01	0.5	8	752.53	0.127762	0.126997	12.7762	12.6997	0.598409	0.126997	0.126138	12.6138	13	12.6997	0.0460315
Periophthalmodon_septemradiatus	5804.41	0.6	51	3058.66	0.0339911	0.0315165	3.39911	3.15165	7.27998	0.0315165	0.0304025	3.04025	57	3.15165	0.127719
Periophthalmus_chrysospilos	2882.52	0.5	9	623.64	0.112432	0.112431	11.2432	11.2431	0.000724387	0.112431	0.11243	11.243	2	11.2431	0.000362194
Periophthalmus_gracilis	303.49	0.3	6	464.03	0.166668	0.166668	16.6668	16.6668	7.39877e-05	0.166668	0.166668	16.6668	7	16.6668	1.05697e-05
Periophthalmus_variabilis	443.393	0.3	5	373.12	0.200008	0.200008	20.0008	20.0008	2.27139e-07	0.200008	0.200008	20.0008	1	20.0008	2.27139e-07
Pethia_stoliczkana	2458.01	0.4	25	1026.01	0.0500958	0.0437793	5.00958	4.37793	12.6089	0.0448411	0.0423581	4.23581	38	4.48411	0.331814
Pethia_ticto	6134.7	0.6	24	959.7	0.0695402	0.0503031	6.95402	5.03031	27.6633	0.0616348	0.04816	4.816	26	6.16348	1.06397
Phalacronotus_apogon	346518	0.9	630	26076.4	0.020636	0.00578635	2.0636	0.578635	71.9599	0.00637556	0.00519982	0.519983	1877	0.637556	0.0383377
Phalacronotus_bleekeri	172649	0.9	354	14944	0.0281699	0.0133445	2.81699	1.33445	52.6286	0.0148619	0.0123068	1.23068	470	1.48619	0.111976
Phalacronotus_micronemus	97985	0.9	487	19824.3	0.0275202	0.00705238	2.75202	0.705238	74.3738	0.00737057	0.00635883	0.635883	1699	0.737057	0.043775
Phallostethus_cuulong	10381.4	0.6	12	880.85	0.109185	0.107078	10.9185	10.7078	1.92961	0.107078	0.104266	10.4266	9	10.7078	0.214401
Phenablennius_heyligeri	2992.46	0.5	24	1520.64	0.0549137	0.0508572	5.49137	5.08572	7.387	0.0508572	0.0491141	4.91141	38	5.08572	0.194395
Phenacostethus_posthon	422.294	0.3	314	11683.4	0.00449738	0.00356027	0.449738	0.356027	20.8369	0.00358142	0.00349566	0.349566	1653	0.358142	0.0126055
Phenacostethus_smithi	418.673	0.3	28	1060.33	0.0436302	0.0385805	4.36302	3.85805	11.574	0.0385805	0.0385632	3.85632	43	3.85805	0.269163
Phenacostethus_trewavasae	564.066	0.3	1	103.48	1	1	100	100	0	1	1		0		0
Photopectoralis_bindus	1945.82	0.4	2	131.99	0.500003	0.500003	50.0003	50.0003	2.91814e-08	0.500003	0.500003	50.0003	0	50.0003	0
Physoschistura_pseudobrunneana	4530.46	0.5	281	10482	0.00663496	0.00552168	0.663496	0.552168	16.779	0.0055797	0.00538623	0.538623	390	0.55797	0.043023
Physoschistura_raoi	359.854	0.3	4	127.54	0.348088	0.318606	34.8088	31.8606	8.46957	0.318606	0.280236	28.0236	13	31.8606	0.651505
Physoschistura_shuangjiangensis	1137.21	0.4	31	1693.05	0.0372724	0.0349953	3.72724	3.49953	6.10936	0.0369184	0.0348614	3.48614	83	3.69184	0.0736068
Piaractus_brachypomus	262683	0.9	30	947.36	0.181453	0.156176	18.1453	15.6176	13.9303	0.156176	0.152982	15.2982	8	15.6176	1.74129
Pisodonophis_boro	108906	0.9	17	863.88	0.342709	0.284133	34.2709	28.4133	17.092	0.284133	0.259165	25.9165	8	28.4133	2.13651
Pisodonophis_cancrivorus	22884.1	0.7	2	118.29	0.507356	0.500325	50.7356	50.0325	1.38577	0.500325	0.5	50	9	50.0325	0.153975
Placocheilus_cryptonemus	8799.84	0.6	74	3862.89	0.0222915	0.0155345	2.22915	1.55345	30.3117	0.0186542	0.015106	1.5106	359	1.86542	0.0844337
Planiliza_macrolepis	48399.8	0.8	31	2119.54	0.121259	0.0918047	12.1259	9.18047	24.2904	0.0918047	0.0770288	7.70288	44	9.18047	0.552056
Planiliza_planiceps	132812	0.9	46	3061.05	0.192163	0.123828	19.2163	12.3828	35.5609	0.123828	0.101894	10.1894	57	12.3828	0.623875
Planiliza_subviridis	65785.5	0.8	49	3242.85	0.0735697	0.0591511	7.35697	5.91511	19.5986	0.0591511	0.0529354	5.29354	57	5.91511	0.343834
Planiliza_tade	117517	0.9	36	2252.14	0.245625	0.160396	24.5625	16.0396	34.6988	0.160396	0.129374	12.9374	49	16.0396	0.708139
Platycephalus_indicus	149329	0.9	16	893.88	0.323774	0.280735	32.3774	28.0735	13.2928	0.280735	0.251092	25.1092	13	28.0735	1.02252
Plectorhinchus_gibbosus	151130	0.9	36	2278.65	0.235483	0.152105	23.5483	15.2105	35.4073	0.152105	0.121684	12.1684	49	15.2105	0.722599
Plectropomus_maculatus	60696.6	0.8	1	68.29	1	1	100	100	0	1	1		6		0
Plotosus_canius	367338	0.9	39	1756.38	0.153317	0.143977	15.3317	14.3977	6.09174	0.143977	0.138666	13.8666	17	14.3977	0.358337
Poecilia_reticulata	162.618	0.3	212	10050.2	0.00614478	0.00572758	0.614478	0.572758	6.78956	0.00573235	0.00566541	0.566541	256	0.573235	0.0265217
Polynemus_aquilonaris	36277.8	0.8	209	9988.93	0.0192855	0.0126548	1.92855	1.26548	34.3816	0.0128997	0.0118163	1.18163	255	1.28997	0.13483
Polynemus_bidentatus	1651.28	0.4	3	100.31	0.364576	0.341125	36.4576	34.1125	6.43252	0.341125	0.333645	33.3645	8	34.1125	0.804065
Polynemus_dubius	45095.8	0.8	52	2395.75	0.0593529	0.0535748	5.93529	5.35748	9.73526	0.0535748	0.0525123	5.25123	42	5.35748	0.231792
Polynemus_melanochir	66738.8	0.8	165	8041.23	0.023828	0.0166365	2.3828	1.66365	30.181	0.0166365	0.0158309	1.58309	161	1.66365	0.187459
Polynemus_multifilis	2990.52	0.5	1	55.88	1	1	100	100	0	1	1		0		0
Polynemus_paradiseus	37636.5	0.8	20	1596.34	0.114765	0.0928972	11.4765	9.28972	19.0544	0.0928972	0.0818691	8.18691	36	9.28972	0.529289
Pomadasys_argenteus	25643	0.7	7	580.97	0.204172	0.160539	20.4172	16.0539	21.3708	0.160539	0.145901	14.5901	22	16.0539	0.971399
Pomadasys_maculatus	11097	0.6	5	511	0.212516	0.209391	21.2516	20.9391	1.47067	0.209391	0.20522	20.522	6	20.9391	0.245111
Poropuntius_angustus	19353	0.7	89	2956.51	0.0378276	0.0236781	3.78276	2.36781	37.4053	0.0274127	0.0225195	2.25195	141	2.74127	0.265286
Poropuntius_bolovenensis	8545.81	0.6	28	1052.89	0.0677586	0.0596538	6.77586	5.96538	11.9613	0.0599383	0.0596538	5.96538	22	5.99383	0.543694
Poropuntius_carinatus	20517	0.7	252	9916.54	0.0113095	0.00729299	1.13095	0.729299	35.5143	0.00850046	0.0069097	0.69097	436	0.850046	0.0814549
Poropuntius_chondrorhynchus	17141.9	0.7	1	65.57	1	1	100	100	0	1	1		11		0
Poropuntius_cogginii	19856.8	0.7	7	494.63	0.208857	0.142857	20.8857	14.2857	31.6006	0.205316	0.142857	14.2857	32	20.5316	0.987517
Poropuntius_consternans	4729.49	0.5	27	1023.8	0.0600749	0.0546663	6.00749	5.46663	9.00314	0.0548153	0.0546663	5.46663	22	5.48153	0.409234
Poropuntius_daliensis	19777.9	0.7	9	658.69	0.158077	0.111111	15.8077	11.1111	29.7106	0.155944	0.111111	11.1111	33	15.5944	0.900323
Poropuntius_deauratus	15286.4	0.7	77	2571.51	0.0364068	0.0298713	3.64068	2.98713	17.9514	0.0317337	0.0280854	2.80854	24	3.17337	0.747973
Poropuntius_exiguus	943.671	0.3	1	160.47	1	1	100	100	0	1	1		18		0
Poropuntius_huangchuchieni	38740.4	0.8	77	4246.61	0.0363842	0.0164709	3.63842	1.64709	54.7306	0.0239534	0.0157411	1.57411	396	2.39534	0.138209
Poropuntius_kontumensis	12308.8	0.6	31	1647.36	0.0753581	0.0553121	7.53581	5.53121	26.601	0.063864	0.0514487	5.14487	77	6.3864	0.345467
Poropuntius_krempfi	14520.9	0.7	31	1468.2	0.0646821	0.0417836	6.46821	4.17836	35.4015	0.0571045	0.0404417	4.04417	86	5.71045	0.411646
Poropuntius_laoensis	30388.6	0.8	381	16874.5	0.011411	0.00675248	1.1411	0.675248	40.825	0.00755621	0.00637685	0.637685	595	0.755621	0.0686134
Poropuntius_normani	28805.8	0.8	307	15654.7	0.0125469	0.0083469	1.25469	0.83469	33.4744	0.00882384	0.00777728	0.777728	408	0.882384	0.082045
Poropuntius_speleops	1398.27	0.4	6	451.72	0.168457	0.166667	16.8457	16.6667	1.06305	0.166667	0.166667	16.6667	83	16.6667	0.0128078
Pristis_pristis	310578	0.9	4	154.27	0.679403	0.333583	67.9403	33.3583	50.9006	0.333583	0.333583	33.3583	0	33.3583	50.9006
Pristolepis_fasciata	13167.4	0.7	599	24798.5	0.00495287	0.00287063	0.495287	0.287063	42.0412	0.00294674	0.00275639	0.275639	1796	0.294674	0.0234082
Probarbus_jullieni	481253	0.9	193	8102.15	0.0460394	0.0289176	4.60394	2.89176	37.1894	0.0318203	0.0265709	2.65709	193	3.18203	0.192691
Probarbus_labeamajor	599024	0.9	132	5750.3	0.0741704	0.0441105	7.41704	4.41105	40.5283	0.0493973	0.0412845	4.12845	125	4.93973	0.324226
Probarbus_labeaminor	731763	0.9	80	3470.67	0.124141	0.0670205	12.4141	6.70205	46.0127	0.0704103	0.0588162	5.88162	109	7.04103	0.422134
Psammogobius_biocellatus	2649.99	0.5	1	158.89	1	1	100	100	0	1	1		4		0
Pseudapocryptes_borneensis	1011.87	0.3	1	68.29	1	1	100	100	0	1	1		6		0
Pseudapocryptes_elongatus	1891.65	0.4	11	1059.06	0.0924828	0.0924075	9.24828	9.24075	0.0814118	0.0924075	0.0923169	9.23169	16	9.24075	0.00508824
Pseudecheneis_immaculata	6309.86	0.6	108	5186.72	0.0152351	0.0111553	1.52351	1.11553	26.7788	0.0131151	0.0109769	1.09769	445	1.31151	0.0601772
Pseudecheneis_sulcata	12034.9	0.6	45	2396.1	0.0347541	0.0260868	3.47541	2.60868	24.9389	0.0328594	0.0258085	2.58085	157	3.28594	0.158847
Pseudecheneis_sulcatoides	6511.86	0.6	44	2487.73	0.0344366	0.0249646	3.44366	2.49646	27.5055	0.0319399	0.0249617	2.49617	161	3.19399	0.170841
Pseudecheneis_sympelvica	1390.04	0.4	40	1459.8	0.0304761	0.0267859	3.04761	2.67859	12.1084	0.0280461	0.0263555	2.63555	79	2.80461	0.153271
Pseudobagarius_eustictus	1993.48	0.4	2	30.12	0.814782	0.578696	81.4782	57.8696	28.9754	0.578696	0.503148	50.3148	4	57.8696	7.24386
Pseudobagarius_filifer	3053.95	0.5	77	3460.95	0.0213475	0.0202223	2.13475	2.02223	5.27113	0.0202223	0.0201204	2.01204	48	2.02223	0.109815
Pseudobagarius_inermis	1997.37	0.4	285	12726.5	0.004918	0.00446359	0.4918	0.446359	9.23975	0.00461121	0.00439601	0.439601	389	0.461121	0.0237526
Pseudobagarius_leucorhynchus	613.18	0.3	1	48.03	1	1	100	100	0	1	1		5		0
Pseudobagarius_nitidus	2973.16	0.5	45	1882.17	0.0360457	0.0332278	3.60457	3.32278	7.81754	0.0335817	0.0329923	3.29923	27	3.35817	0.289539
Pseudobagarius_similis	3124.32	0.5	31	1925.79	0.0444441	0.042653	4.44441	4.2653	4.02993	0.042653	0.0419554	4.19554	32	4.2653	0.125935
Pseudobagarius_sinensis	1298.75	0.4	13	777.27	0.0991387	0.0903599	9.91387	9.03599	8.85516	0.0928459	0.0860546	8.60546	61	9.28459	0.145167
Pseudobagarius_subtilis	1464.75	0.4	36	1626.07	0.0401757	0.0386205	4.01757	3.86205	3.87089	0.0386642	0.0382057	3.82057	54	3.86642	0.0716831
Pseudogobiopsis_oligactis	2115.72	0.4	102	5413.23	0.0142036	0.0127059	1.42036	1.27059	10.5446	0.012706	0.0125496	1.25496	116	1.2706	0.0909017
Pseudogobiopsis_paludosa	1059.74	0.3	43	2838.45	0.0267569	0.0264094	2.67569	2.64094	1.29867	0.0264094	0.0262643	2.62643	56	2.64094	0.0231905
Pseudogobius_avicennia	294.303	0.3	4	352.63	0.25	0.25	25	25	1.3474e-07	0.25	0.25	25	1	25	1.3474e-07
Pseudogobius_melanosticta	722.113	0.3	32	1985.51	0.0348993	0.0339192	3.48993	3.39192	2.80857	0.0339192	0.0337441	3.37441	39	3.39192	0.0720146
Pseudogobius_poicilosoma	3617.97	0.5	60	3644.16	0.0229812	0.0214592	2.29812	2.14592	6.62287	0.0214599	0.020965	2.0965	88	2.14599	0.0752598
Pseudohemiculter_dispar	43392.9	0.8	26	819.41	0.135806	0.0766907	13.5806	7.66907	43.5294	0.13271	0.0766907	7.66907	14	13.271	3.10924
Pseudohomaloptera_leonardi	2914.75	0.5	50	2079.96	0.032819	0.0305146	3.2819	3.05146	7.02154	0.0307993	0.0298155	2.98155	63	3.07993	0.111453
Pseudohomaloptera_sexmaculata	1338.32	0.4	3	266.84	0.356405	0.333333	35.6405	33.3333	6.47347	0.333333	0.333333	33.3333	12	33.3333	0.539456
Pseudohomaloptera_vulgaris	768.256	0.3	4	411.3	0.250263	0.25	25.0263	25	0.105172	0.250263	0.25	25	54	25.0263	0.00194763
Pseudohomaloptera_yunnanensis	3288.5	0.5	449	20440.1	0.00375833	0.00314476	0.375833	0.314476	16.3256	0.00330981	0.00306504	0.306504	917	0.330981	0.0178033
Pseudolais_micronemus	367799	0.9	522	22948.7	0.0200699	0.00740992	2.00699	0.740992	63.0794	0.00877335	0.00659131	0.659131	1213	0.877335	0.0520028
Pseudolais_pleurotaenia	87548.2	0.9	215	9060.37	0.0415684	0.0231443	4.15684	2.31443	44.3223	0.0248783	0.0207621	2.07621	297	2.48783	0.149233
Pseudolaubuca_sinensis	5925.67	0.6	3	248.94	0.34973	0.333333	34.973	33.3333	4.68825	0.349594	0.333333	33.3333	35	34.9594	0.13395
Pseudomystus_bomboides	494.05	0.3	1	163.06	1	1	100	100	0	1	1		6		0
Pseudomystus_siamensis	13220.1	0.7	867	37240.6	0.00339491	0.00196641	0.339491	0.196641	42.0778	0.00208447	0.001868	0.1868	2355	0.208447	0.0178674
Pseudomystus_stenomus	10378	0.6	4	57.73	0.476197	0.476197	47.6197	47.6197	3.60414e-08	0.476197	0.476197	47.6197	0	47.6197	0
Pterocryptis_cochinchinensis	2930.9	0.5	2	194.79	0.500001	0.5	50.0001	50	0.000136847	0.5	0.5	50	6	50	2.28079e-05
Pterocryptis_inusitata	8241.47	0.6	5	378.11	0.212414	0.204098	21.2414	20.4098	3.91461	0.206477	0.20082	20.082	6	20.6477	0.652435
Pteronemacheilus_meridionalis	1373.64	0.4	60	2651.41	0.0230203	0.0191109	2.30203	1.91109	16.9824	0.0219375	0.0187851	1.87851	202	2.19375	0.0840715
Ptychobarbus_kaznakovi	76118.1	0.8	37	1542.63	0.0825099	0.0573627	8.25099	5.73627	30.4778	0.0659176	0.0570558	5.70558	85	6.59176	0.358563
Puntigrus_partipentazona	1613.24	0.4	311	14124.7	0.00494726	0.00445428	0.494726	0.445428	9.96463	0.00449763	0.00436909	0.436909	561	0.449763	0.0177623
Puntioplites_bulu	147311	0.9	103	4463.89	0.0934972	0.0500954	9.34972	5.00954	46.4204	0.0531757	0.0482244	4.82244	85	5.31757	0.546122
Puntioplites_falcifer	169574	0.9	351	14669.2	0.0298176	0.0146306	2.98176	1.46306	50.9331	0.0161106	0.0132064	1.32064	494	1.61106	0.103103
Puntioplites_proctozysron	262351	0.9	236	9671.82	0.0366173	0.0196095	3.66173	1.96095	46.4475	0.0212109	0.0182788	1.82788	394	2.12109	0.117887
Puntioplites_waandersi	223763	0.9	283	12251.4	0.0336231	0.017437	3.36231	1.7437	48.1399	0.0193545	0.0160045	1.60045	445	1.93545	0.108179
Puntius_brevis	16090.1	0.7	496	21940.6	0.00544805	0.00371171	0.544805	0.371171	31.8708	0.00385653	0.00355892	0.355892	992	0.385653	0.0321278
Puntius_masyai	137.886	0.3	28	1738.1	0.0459007	0.0443317	4.59007	4.43317	3.41826	0.0443317	0.0443317	4.43317	73	4.43317	0.0468255
Puntius_sophoroides	473.559	0.3	4	67.48	0.302697	0.302697	30.2697	30.2697	-1.4044e-07	0.302697	0.302697	30.2697	4	30.2697	-3.51099e-08
Rachycentron_canadum	395296	0.9	2	47.6	0.802806	0.714116	80.2806	71.4116	11.0475	0.714116	0.595756	59.5756	1	71.4116	11.0475
Raiamas_guttatus	38483	0.8	685	29249.7	0.00636537	0.00322711	0.636537	0.322711	49.3021	0.00372411	0.00298663	0.298663	1411	0.372411	0.0349412
Rasbora_amplistriga	2862	0.5	94	4656.83	0.0168664	0.0156948	1.68664	1.56948	6.94612	0.0158116	0.0153593	1.53593	67	1.58116	0.103673
Rasbora_argyrotaenia	2566.36	0.5	9	841.97	0.120935	0.114075	12.0935	11.4075	5.67247	0.114075	0.111527	11.1527	34	11.4075	0.166837
Rasbora_atridorsalis	11761.4	0.6	191	8061.76	0.010931	0.00817943	1.0931	0.817943	25.1718	0.00878809	0.00785792	0.785792	380	0.878809	0.0662416
Rasbora_aurotaenia	21994.1	0.7	264	11799.3	0.0099041	0.00726139	0.99041	0.726139	26.683	0.00755165	0.00693523	0.693523	389	0.755165	0.0685937
Rasbora_borapetensis	3923.23	0.5	521	20249.6	0.00348765	0.00262121	0.348765	0.262121	24.843	0.00266923	0.00255839	0.255839	1465	0.266923	0.0169577
Rasbora_cephalotaenia	3114.53	0.5	1	161.44	1	1	100	100	0	1	1		5		0
Rasbora_daniconius	9334.99	0.6	828	36274.2	0.0025949	0.00176421	0.25949	0.176421	32.0122	0.00182909	0.00170591	0.170591	2337	0.182909	0.013698
Rasbora_dorsinotata	440.496	0.3	1	57.64	1	1	100	100	0	1	1		2		0
Rasbora_dusonensis	18011.9	0.7	190	7456.3	0.0143941	0.010854	1.43941	1.0854	24.5943	0.0110058	0.0104496	1.04496	294	1.10058	0.0836539
Rasbora_einthovenii	10096.7	0.6	19	1446.1	0.0685237	0.068234	6.85237	6.8234	0.422785	0.068234	0.068234	6.8234	54	6.8234	0.00782934
Rasbora_hobelmani	1067.86	0.3	30	1788.99	0.0459788	0.0446136	4.59788	4.46136	2.9691	0.0446136	0.0446136	4.46136	58	4.46136	0.0511913
Rasbora_myersi	5324.62	0.6	10	796.85	0.115978	0.106858	11.5978	10.6858	7.86413	0.106858	0.106684	10.6684	71	10.6858	0.110762
Rasbora_paucisqualis	3215.78	0.5	18	1149.53	0.0866274	0.0799455	8.66274	7.99455	7.71332	0.0799455	0.0799455	7.99455	22	7.99455	0.350606
Rasbora_paviana	10657.4	0.6	915	39352.9	0.00237098	0.00161884	0.237098	0.161884	31.7229	0.00169315	0.00156194	0.156194	2493	0.169315	0.0127248
Rasbora_rubrodorsalis	2405.97	0.4	104	4545.98	0.0149714	0.0135837	1.49714	1.35837	9.26906	0.0135837	0.0132304	1.32304	198	1.35837	0.0468134
Rasbora_septentrionalis	8918.79	0.6	152	5353.82	0.0143579	0.0122658	1.43579	1.22658	14.5711	0.0125469	0.0119853	1.19853	184	1.25469	0.0791908
Rasbora_steineri	7625.01	0.6	3	127.68	0.361322	0.337992	36.1322	33.7992	6.45672	0.361322	0.337992	33.7992	2	36.1322	3.22836
Rasbora_sumatrana	3354.47	0.5	15	720.31	0.0848302	0.0842064	8.48302	8.42064	0.735282	0.0842064	0.0842064	8.42064	54	8.42064	0.0136163
Rasbora_tornieri	23698.9	0.7	727	29706.2	0.00409381	0.00239884	0.409381	0.239884	41.4032	0.00248575	0.00228938	0.228938	2088	0.248575	0.0198291
Rasbora_trilineata	15036.6	0.7	600	25451	0.00493994	0.00281396	0.493994	0.281396	43.0365	0.00289583	0.0026959	0.26959	1864	0.289583	0.0230883
Rasbosoma_spilocerca	961.172	0.3	232	8996.29	0.0059862	0.00531278	0.59862	0.531278	11.2495	0.00532574	0.00524655	0.524655	510	0.532574	0.0220578
Redigobius_balteatus	1448.81	0.4	23	1245.57	0.0519605	0.0510578	5.19605	5.10578	1.73733	0.0510578	0.0507654	5.07654	24	5.10578	0.0723886
Redigobius_bikolanus	609.675	0.3	7	775.61	0.142858	0.142858	14.2858	14.2858	-1.79507e-08	0.142858	0.142858	14.2858	12	14.2858	-1.49589e-09
Redigobius_chrysosoma	469.598	0.3	25	1332.93	0.0504385	0.0503499	5.04385	5.03499	0.175623	0.0503499	0.0502317	5.02317	6	5.03499	0.0292705
Redigobius_tambujon	550.078	0.3	3	379.01	0.334054	0.333843	33.4054	33.3843	0.0632087	0.333843	0.333561	33.3561	6	33.3843	0.0105348
Rhinogobio_ventralis	87087.1	0.9	8	393.86	0.397617	0.192774	39.7617	19.2774	51.5177	0.282544	0.162525	16.2525	15	28.2544	3.43451
Rhinogobius_albimaculatus	152.873	0.3	7	398.24	0.157054	0.143858	15.7054	14.3858	8.40247	0.157054	0.143858	14.3858	25	15.7054	0.336099
Rhinogobius_brunneus	48836.5	0.8	35	2065.07	0.0674963	0.0402748	6.74963	4.02748	40.3303	0.0584314	0.0385002	3.85002	103	5.84314	0.391556
Rhinogobius_changjiangensis	394.135	0.3	1	6.63	1	1	100	100	0	1	1		3		0
Rhinogobius_chiengmaiensis	530.011	0.3	1	65.57	1	1	100	100	0	1	1		11		0
Rhinogobius_lineatus	591.118	0.3	15	621.23	0.115895	0.09283	11.5895	9.283	19.9014	0.0988737	0.0872486	8.72486	24	9.88737	0.829225
Rhinogobius_maculicervix	544.816	0.3	21	1077.89	0.0573798	0.0508228	5.73798	5.08228	11.4274	0.0542864	0.0488249	4.88249	78	5.42864	0.146505
Rhinogobius_mekongianus	1689.06	0.4	132	4905.77	0.0111355	0.0100984	1.11355	1.00984	9.31329	0.0107468	0.00991152	0.991152	180	1.07468	0.0517405
Rhinogobius_milleri	245.607	0.3	15	519.21	0.071809	0.0669584	7.1809	6.69584	6.75497	0.0699998	0.0669238	6.69238	34	6.99998	0.198675
Rhinogobius_similis	4500.98	0.5	45	2463.74	0.0310334	0.0247014	3.10334	2.47014	20.404	0.0291819	0.024271	2.4271	179	2.91819	0.113989
Rhinogobius_taenigena	1028.71	0.3	32	1678.55	0.0377917	0.0352125	3.77917	3.52125	6.82491	0.0352125	0.0351605	3.51605	70	3.52125	0.0974987
Rhodeus_laoensis	1350.61	0.4	15	621.23	0.131125	0.0974898	13.1125	9.74898	25.6513	0.105545	0.0900276	9.00276	24	10.5545	1.0688
Rhodeus_spinalis	2104.98	0.4	8	294.94	0.154932	0.125	15.4932	12.5	19.3197	0.144369	0.125	12.5	78	14.4369	0.247688
Rhyacoschistura_larreci	1789.26	0.4	1	52.82	1	1	100	100	0	1	1		1		0
Rhyacoschistura_suber	1023.91	0.3	3	264.98	0.376708	0.364004	37.6708	36.4004	3.37245	0.364004	0.34705	34.705	7	36.4004	0.481778
Sardinella_gibbosa	4806.21	0.5	3	123.11	0.339766	0.334019	33.9766	33.4019	1.69134	0.334019	0.333338	33.3338	12	33.4019	0.140945
Saurida_tumbil	102090	0.9	7	546.64	0.449498	0.294893	44.9498	29.4893	34.395	0.294893	0.2225	22.25	13	29.4893	2.64577
Scaphiodonichthys_acanthopterus	39678.2	0.8	273	11735.8	0.0133788	0.00818789	1.33788	0.818789	38.7996	0.0101916	0.0077072	0.77072	434	1.01916	0.0894001
Scaphiodonichthys_burmanicus	15598.1	0.7	4	58.82	0.785601	0.484996	78.5601	48.4996	38.2642	0.484996	0.404438	40.4438	2	48.4996	19.1321
Scaphognathops_bandanensis	132760	0.9	235	10017.9	0.0423225	0.0233932	4.23225	2.33932	44.7264	0.0257745	0.0214521	2.14521	251	2.57745	0.178193
Scaphognathops_stejnegeri	81855.3	0.9	189	7509.95	0.0485185	0.0291707	4.85185	2.91707	39.8771	0.0323995	0.0271851	2.71851	177	3.23995	0.225294
Scaphognathops_theunensis	46200.7	0.8	14	542.78	0.305424	0.13352	30.5424	13.352	56.2838	0.167001	0.109634	10.9634	18	16.7001	3.12688
Scartelaos_histophorus	1643.07	0.4	10	538.39	0.102032	0.101636	10.2032	10.1636	0.387733	0.101636	0.101108	10.1108	2	10.1636	0.193866
Scatophagus_argus	77464.1	0.9	42	2498.59	0.223729	0.144597	22.3729	14.4597	35.3697	0.144597	0.118666	11.8666	50	14.4597	0.707393
Schistura_albisella	409.688	0.3	1	67.08	1	1	100	100	0	1	1		1		0
Schistura_amplizona	3155.72	0.5	43	1354.54	0.0435279	0.0392025	4.35279	3.92025	9.93703	0.040999	0.0384377	3.84377	57	4.0999	0.174334
Schistura_aramis	905.221	0.3	2	277.17	0.5	0.5	50	50	0	0.5	0.5	50	7	50	0
Schistura_athos	4760.3	0.5	34	1345.21	0.0509031	0.0426785	5.09031	4.26785	16.1572	0.0491556	0.0422357	4.22357	50	4.91556	0.323145
Schistura_atra	1035.94	0.3	7	521.29	0.143081	0.142952	14.3081	14.2952	0.0897985	0.142977	0.142876	14.2876	13	14.2977	0.00690757
Schistura_bairdi	1774.53	0.4	37	1259.15	0.0430573	0.0427624	4.30573	4.27624	0.684806	0.0430292	0.0427436	4.27436	7	4.30292	0.0978294
Schistura_bannaensis	1148.31	0.4	4	244.01	0.342881	0.25	34.2881	25	27.0883	0.33279	0.25	25	2	33.279	13.5442
Schistura_bolavenensis	1913.89	0.4	12	652.35	0.0961353	0.0852186	9.61353	8.52186	11.3555	0.0855411	0.0852186	8.52186	17	8.55411	0.667972
Schistura_breviceps	3485.45	0.5	46	1594.87	0.0457925	0.0346697	4.57925	3.46697	24.2896	0.0348107	0.0333433	3.33433	66	3.48107	0.368024
Schistura_bucculenta	7355.36	0.6	81	2957.88	0.0259719	0.0214664	2.59719	2.14664	17.3474	0.0240877	0.0210288	2.10288	154	2.40877	0.112645
Schistura_callichroma	259.239	0.3	2	195.07	0.5	0.5	50	50	0	0.5	0.5	50	15	50	0
Schistura_cataracta	1711.18	0.4	15	621.23	0.131125	0.0974898	13.1125	9.74898	25.6513	0.105545	0.0900276	9.00276	24	10.5545	1.0688
Schistura_caudofurca	1130.07	0.4	4	99.09	0.32755	0.304836	32.755	30.4836	6.93449	0.304836	0.274524	27.4524	6	30.4836	1.15575
Schistura_clatrata	2054.07	0.4	21	1055.05	0.0588794	0.0517803	5.88794	5.17803	12.0571	0.0519534	0.05171	5.171	24	5.19534	0.502378
Schistura_colossa	2314.12	0.4	5	405.11	0.200054	0.2	20.0054	20	0.0269264	0.2	0.2	20	24	20	0.00112193
Schistura_conirostris	1420.8	0.4	13	886.41	0.0863716	0.0827496	8.63716	8.27496	4.19351	0.0844313	0.0827496	8.27496	60	8.44313	0.0698919
Schistura_coruscans	282.773	0.3	6	168	0.234123	0.216693	23.4123	21.6693	7.44458	0.234122	0.216693	21.6693	2	23.4122	3.72229
Schistura_crabro	203.166	0.3	11	327.99	0.103026	0.094807	10.3026	9.4807	7.97742	0.0949658	0.0919644	9.19644	22	9.49658	0.36261
Schistura_crassa	1352.07	0.4	3	123.82	0.367649	0.344315	36.7649	34.4315	6.34694	0.348921	0.338244	33.8244	6	34.8921	1.05782
Schistura_cryptofasciata	2850.04	0.5	2	92.39	0.506722	0.5	50.6722	50	1.32647	0.5	0.5	50	30	50	0.0442156
Schistura_daubentoni	871.468	0.3	20	1012.68	0.0602715	0.0595925	6.02715	5.95925	1.12656	0.0599851	0.059581	5.9581	9	5.99851	0.125173
Schistura_defectiva	923.013	0.3	43	1519.17	0.0270292	0.0255567	2.70292	2.55567	5.44781	0.0260953	0.0249185	2.49185	83	2.60953	0.0656363
Schistura_desmotes	4365.66	0.5	1	160.47	1	1	100	100	0	1	1		18		0
Schistura_diminuta	331.101	0.3	1	18.53	1	1	100	100	0	1	1		0		0
Schistura_dorsizona	886.071	0.3	27	1452.87	0.0558893	0.0479099	5.58893	4.79099	14.2772	0.0506359	0.0461872	4.61872	75	5.06359	0.190363
Schistura_ephelis	1701.25	0.4	13	412.83	0.094945	0.0783211	9.4945	7.83211	17.509	0.0890482	0.0776394	7.76394	15	8.90482	1.16727
Schistura_epixenos	209.858	0.3	1	71.07	1	1	100	100	0	1	1		1		0
Schistura_fasciolata	5914.03	0.6	54	2994.7	0.0281932	0.0217247	2.81932	2.17247	22.9436	0.0261998	0.0215275	2.15275	210	2.61998	0.109255
Schistura_fusinotata	405.159	0.3	22	874.03	0.0565027	0.0533763	5.65027	5.33763	5.53317	0.0533763	0.0533577	5.33577	18	5.33763	0.307398
Schistura_globiceps	1087.82	0.3	9	391.28	0.119186	0.11541	11.9186	11.541	3.16851	0.115443	0.11541	11.541	21	11.5443	0.150882
Schistura_imitator	729.275	0.3	26	1264.95	0.0469712	0.0432584	4.69712	4.32584	7.90431	0.0435302	0.0432439	4.32439	29	4.35302	0.272562
Schistura_irregularis	1996.66	0.4	8	353.22	0.151739	0.141739	15.1739	14.1739	6.58993	0.143353	0.13225	13.225	7	14.3353	0.941419
Schistura_isostigma	1054.91	0.3	109	4643.17	0.0120709	0.0108775	1.20709	1.08775	9.88715	0.0108968	0.0106239	1.06239	171	1.08968	0.0578196
Schistura_kaysonei	1498.32	0.4	13	574.57	0.0977076	0.0946814	9.77076	9.46814	3.0972	0.0946814	0.0931262	9.31262	10	9.46814	0.30972
Schistura_kengtungensis	6880.81	0.6	263	10149.6	0.00844417	0.00623261	0.844417	0.623261	26.1904	0.00670568	0.00601431	0.601431	482	0.670568	0.0543369
Schistura_khamtanhi	5747.38	0.6	58	2628.67	0.032394	0.0291484	3.2394	2.91484	10.0191	0.0296802	0.0290168	2.90168	37	2.96802	0.270788
Schistura_khugae	1319.28	0.4	5	328.08	0.235639	0.220613	23.5639	22.0613	6.3768	0.231238	0.220613	22.0613	12	23.1238	0.5314
Schistura_kloetzliae	2047.2	0.4	23	839.39	0.0647122	0.058853	6.47122	5.8853	9.05432	0.0619377	0.0574681	5.74681	33	6.19377	0.274373
Schistura_klydonion	1003.19	0.3	1	131.33	1	1	100	100	0	1	1		10		0
Schistura_kohchangensis	499.09	0.3	3	243.16	0.333345	0.333333	33.3345	33.3333	0.00355583	0.333333	0.333333	33.3333	12	33.3333	0.000296319
Schistura_kongphengi	2165.76	0.4	38	1931.91	0.037985	0.0322676	3.7985	3.22676	15.0517	0.0335228	0.0306569	3.06569	66	3.35228	0.228056
Schistura_kontumensis	1843.2	0.4	23	1590.34	0.0616439	0.0463433	6.16439	4.63433	24.8211	0.0562112	0.0463282	4.63282	84	5.62112	0.295489
Schistura_laterimaculata	2394.23	0.4	1	26.36	1	1	100	100	0	1	1		1		0
Schistura_latidens	873.384	0.3	12	939.66	0.0933886	0.0906055	9.33886	9.06055	2.98012	0.0906055	0.0868936	8.68936	41	9.06055	0.0726857
Schistura_latifasciata	3337.46	0.5	49	2400.84	0.0284804	0.0228002	2.84804	2.28002	19.9443	0.0272312	0.0225429	2.25429	94	2.72312	0.212173
Schistura_leukensis	579.042	0.3	1	163.06	1	1	100	100	0	1	1		6		0
Schistura_longa	483.203	0.3	1	57.64	1	1	100	100	0	1	1		2		0
Schistura_macrocephalus	4223.3	0.5	12	564.61	0.128354	0.0942728	12.8354	9.42728	26.5528	0.110272	0.0882203	8.82203	30	11.0272	0.885093
Schistura_magnifluvis	4697.62	0.5	68	2566.86	0.0258264	0.0226369	2.58264	2.26369	12.3497	0.02273	0.0223437	2.23437	47	2.273	0.26276
Schistura_melarancia	4240	0.5	60	2295.13	0.0284943	0.0222935	2.84943	2.22935	21.7615	0.0247522	0.0219993	2.19993	90	2.47522	0.241795
Schistura_menanensis	2785.82	0.5	25	1048.51	0.0555683	0.0480536	5.55683	4.80536	13.5233	0.0482032	0.0475661	4.75661	54	4.82032	0.250432
Schistura_musa	804.878	0.3	3	118.12	0.356265	0.34945	35.6265	34.945	1.91296	0.34945	0.340482	34.0482	2	34.945	0.95648
Schistura_namboensis	2793.03	0.5	59	3228.19	0.0286204	0.0238136	2.86204	2.38136	16.795	0.025185	0.0228123	2.28123	88	2.5185	0.190853
Schistura_nicholsi	4130.15	0.5	459	18437.3	0.00393613	0.00282967	0.393613	0.282967	28.1103	0.00290483	0.00276053	0.276053	1729	0.290483	0.0162581
Schistura_nomi	754.869	0.3	44	1983.92	0.02815	0.0266045	2.815	2.66045	5.49009	0.0266172	0.0263236	2.63236	34	2.66172	0.161473
Schistura_novemradiata	1544.01	0.4	9	391.28	0.124921	0.117638	12.4921	11.7638	5.83003	0.117818	0.117638	11.7638	21	11.7818	0.277621
Schistura_nudidorsum	4062.47	0.5	42	2051.19	0.0416016	0.0344379	4.16016	3.44379	17.2197	0.0358646	0.0327901	3.27901	55	3.58646	0.313085
Schistura_obeini	4306.24	0.5	7	461.31	0.145445	0.143784	14.5445	14.3784	1.14203	0.144097	0.143043	14.3043	12	14.4097	0.0951689
Schistura_personata	220.716	0.3	4	136.68	0.292281	0.253065	29.2281	25.3065	13.4173	0.292279	0.253065	25.3065	2	29.2279	6.70865
Schistura_pertica	1623.47	0.4	10	612.13	0.118579	0.104685	11.8579	10.4685	11.7165	0.111321	0.100946	10.0946	39	11.1321	0.300424
Schistura_pervagata	6454.62	0.6	1	54.71	1	1	100	100	0	1	1		4		0
Schistura_poculi	3894.71	0.5	126	4487.89	0.0142543	0.0109076	1.42543	1.09076	23.4783	0.0120204	0.0106833	1.06833	191	1.20204	0.122923
Schistura_porthos	5682.32	0.6	100	3938.14	0.0193868	0.0134345	1.93868	1.34345	30.7029	0.01565	0.0129905	1.29905	198	1.565	0.155065
Schistura_procera	4117.53	0.5	33	999.79	0.0549731	0.0373412	5.49731	3.73412	32.0737	0.043716	0.0370992	3.70992	54	4.3716	0.593957
Schistura_punctifasciata	531.97	0.3	5	359.37	0.210443	0.206051	21.0443	20.6051	2.08686	0.206051	0.206045	20.6045	13	20.6051	0.160527
Schistura_quaesita	574.452	0.3	1	43.55	1	1	100	100	0	1	1		5		0
Schistura_quasimodo	191.33	0.3	1	92.82	1	1	100	100	0	1	1		1		0
Schistura_rikiki	483.274	0.3	2	52.15	0.637049	0.637049	63.7049	63.7049	-6.42585e-08	0.637049	0.637049	63.7049	0	63.7049	0
Schistura_russa	1252.81	0.4	9	391.28	0.124921	0.117638	12.4921	11.7638	5.83003	0.117818	0.117638	11.7638	21	11.7818	0.277621
Schistura_schultzi	5819.67	0.6	99	3267.49	0.0260175	0.0172328	2.60175	1.72328	33.7645	0.0177086	0.0166338	1.66338	198	1.77086	0.170528
Schistura_sertata	1353.12	0.4	4	173.43	0.361584	0.31685	36.1584	31.685	12.3717	0.326098	0.278991	27.8991	2	32.6098	6.18587
Schistura_sexcauda	2772.63	0.5	48	1374.71	0.0427096	0.0286914	4.27096	2.86914	32.8222	0.0291154	0.0281061	2.81061	136	2.91154	0.24134
Schistura_sexnubes	1099.82	0.3	2	92.39	0.500281	0.5	50.0281	50	0.0561073	0.5	0.5	50	30	50	0.00187024
Schistura_sigillata	846.702	0.3	12	359.59	0.0960191	0.0842501	9.60191	8.42501	12.257	0.0921417	0.0836842	8.36842	14	9.21417	0.875498
Schistura_sokolovi	4090.06	0.5	4	327.14	0.251795	0.25	25.1795	25	0.712974	0.25	0.25	25	12	25	0.0594145
Schistura_sombooni	2875.6	0.5	79	3784.13	0.0201112	0.0156246	2.01112	1.56246	22.3092	0.0170717	0.0149852	1.49852	147	1.70717	0.151763
Schistura_spiloptera	1110.34	0.3	9	450.72	0.136695	0.134138	13.6695	13.4138	1.87038	0.136693	0.134138	13.4138	5	13.6693	0.374075
Schistura_spilota	789.041	0.3	1	68.73	1	1	100	100	0	1	1		9		0
Schistura_stala	1083.44	0.3	1	162.36	1	1	100	100	0	1	1		19		0
Schistura_tenura	795.534	0.3	1	163.06	1	1	100	100	0	1	1		6		0
Schistura_thavonei	2716.82	0.5	1	57.64	1	1	100	100	0	1	1		2		0
Schistura_tizardi	678.985	0.3	7	353.64	0.156785	0.156775	15.6785	15.6775	0.0065052	0.156775	0.156775	15.6775	13	15.6775	0.0005004
Schistura_tubulinaris	1571.48	0.4	5	413.29	0.200267	0.2	20.0267	20	0.133506	0.200119	0.2	20	12	20.0119	0.0111255
Schistura_vinciguerrae	1846.15	0.4	29	1404.68	0.0447646	0.0389499	4.47646	3.89499	12.9894	0.0389499	0.0383702	3.83702	102	3.89499	0.127347
Schistura_waltoni	4735.69	0.5	2	334.25	0.5	0.5	50	50	1.98952e-13	0.5	0.5	50	46	50	4.32504e-15
Schistura_xhatensis	558.862	0.3	10	399.34	0.11912	0.115032	11.912	11.5032	3.4325	0.115656	0.110854	11.0854	7	11.5656	0.490357
Schistura_yersini	1177.68	0.4	21	967.92	0.0652831	0.0480293	6.52831	4.80293	26.4292	0.055517	0.0478987	4.78987	38	5.5517	0.695505
Schizopygopsis_anteroventris	37308.2	0.8	60	2331.21	0.0685421	0.0492156	6.85421	4.92156	28.1966	0.0554408	0.0490794	4.90794	103	5.54408	0.273753
Schizopygopsis_firmispinata	28259.7	0.8	8	398.55	0.265412	0.198795	26.5412	19.8795	25.0996	0.248886	0.198795	19.8795	19	24.8886	1.32103
Schizopygopsis_malacanthus	5674.58	0.6	1	34.72	1	1	100	100	0	1	1		0		0
Schizopygopsis_potanini	29972	0.8	8	231.16	0.411602	0.174663	41.1602	17.4663	57.5651	0.320215	0.174663	17.4663	18	32.0215	3.19806
Schizopygopsis_thermalis	7088.03	0.6	5	437.44	0.201735	0.201377	20.1735	20.1377	0.177381	0.201735	0.201377	20.1377	1	20.1735	0.177381
Schizothorax_dolichonema	58034.2	0.8	23	953.59	0.148152	0.0519968	14.8152	5.19968	64.903	0.103589	0.050959	5.0959	94	10.3589	0.690458
Schizothorax_griseus	15135	0.7	132	5142.83	0.0211245	0.0158271	2.11245	1.58271	25.077	0.017558	0.0155333	1.55333	312	1.7558	0.0803749
Schizothorax_lantsangensis	54357.1	0.8	98	4823.71	0.0317063	0.0183713	3.17063	1.83713	42.058	0.0245708	0.0179251	1.79251	424	2.45708	0.0991933
Schizothorax_lissolabiatus	26199.9	0.7	82	3796.37	0.0266307	0.0196114	2.66307	1.96114	26.3578	0.0234483	0.0195392	1.95392	287	2.34483	0.0918389
Schizothorax_nudiventris	17879.2	0.7	28	1585.32	0.0665933	0.0462734	6.65933	4.62734	30.5135	0.0638626	0.0462734	4.62734	128	6.38626	0.238387
Schizothorax_oconnori	55915.2	0.8	6	230.78	0.377637	0.361074	37.7637	36.1074	4.38596	0.361074	0.361074	36.1074	4	36.1074	1.09649
Schizothorax_taliensis	27855.9	0.8	2	169.4	0.513927	0.5	51.3927	50	2.7099	0.5	0.5	50	19	50	0.142626
Schizothorax_waltoni	67465.3	0.8	6	230.78	0.377637	0.361074	37.7637	36.1074	4.38596	0.361074	0.361074	36.1074	4	36.1074	1.09649
Schizothorax_yunnanensis	67004.4	0.8	29	1815.51	0.0762602	0.0506882	7.62602	5.06882	33.5326	0.0697024	0.0506882	5.06882	142	6.97024	0.236145
Scleropages_formosus	147278	0.9	136	6818.93	0.070895	0.0340778	7.0895	3.40778	51.9321	0.0343599	0.0290904	2.90904	285	3.43599	0.182218
Scomberoides_lysan	179650	0.9	8	621.82	0.418927	0.214284	41.8927	21.4284	48.8492	0.214284	0.153808	15.3808	22	21.4284	2.22042
Scomberomorus_sinensis	1.67401e+06	0.9	101	4432.8	0.0910838	0.0598438	9.10838	5.98438	34.298	0.0613469	0.055329	5.5329	77	6.13469	0.445429
Sectoria_heterognathos	2552.2	0.5	18	988.34	0.0757854	0.0649755	7.57854	6.49755	14.2638	0.0675181	0.0622855	6.22855	78	6.75181	0.182869
Selaroides_leptolepis	8069.6	0.6	10	711.25	0.12615	0.110719	12.615	11.0719	12.2322	0.110719	0.103878	10.3878	22	11.0719	0.556007
Serpenticobitis_cingulata	1787.27	0.4	121	4740.72	0.0121595	0.00993009	1.21595	0.993009	18.3348	0.0103886	0.00978962	0.978962	247	1.03886	0.0742301
Serpenticobitis_octozona	1207.62	0.4	24	1225.59	0.0567801	0.0539414	5.67801	5.39414	4.99955	0.0540739	0.0539414	5.39414	26	5.40739	0.19229
Serpenticobitis_zonata	2062.54	0.4	273	10643.1	0.00586002	0.00456259	0.586002	0.456259	22.1403	0.00458178	0.00446971	0.446971	1009	0.458178	0.0219428
Setipinna_melanochir	130363	0.9	248	11304.6	0.0413735	0.0167741	4.13735	1.67741	59.4568	0.0168274	0.0147655	1.47655	573	1.68274	0.103764
Setipinna_taty	2241.67	0.4	7	580.97	0.151114	0.14527	15.1114	14.527	3.86696	0.14527	0.14313	14.313	22	14.527	0.175771
Sewellia_breviventralis	1329.01	0.4	10	327.6	0.179742	0.1	17.9742	10	44.3648	0.151868	0.1	10	36	15.1868	1.23236
Sewellia_diardi	1087.54	0.3	31	1361.13	0.0414589	0.0401999	4.14589	4.01999	3.03673	0.0401999	0.040193	4.0193	22	4.01999	0.138033
Sewellia_elongata	1143.25	0.4	29	1116.01	0.0485603	0.0470889	4.85603	4.70889	3.03003	0.0472088	0.0470889	4.70889	17	4.72088	0.178237
Sewellia_patella	1646.32	0.4	4	370.55	0.255665	0.25	25.5665	25	2.21578	0.251909	0.25	25	26	25.1909	0.0852224
Sewellia_speciosa	733.962	0.3	44	2080.77	0.0288334	0.0273098	2.88334	2.73098	5.28406	0.0273226	0.0273052	2.73052	34	2.73226	0.155413
Siganus_fuscescens	9356.75	0.6	7	594.96	0.156886	0.154092	15.6886	15.4092	1.78066	0.154092	0.150364	15.0364	6	15.4092	0.296776
Sikukia_flavicaudata	26270.5	0.7	105	4541.02	0.0271919	0.0192114	2.71919	1.92114	29.3489	0.0207149	0.018243	1.8243	234	2.07149	0.125423
Sikukia_gudgeri	28113.2	0.8	203	8020.79	0.019664	0.0152747	1.9664	1.52747	22.3212	0.0162221	0.0146441	1.46441	147	1.62221	0.151845
Sikukia_longibarbata	15390.8	0.7	10	608.25	0.182828	0.134052	18.2828	13.4052	26.6786	0.162308	0.134052	13.4052	15	16.2308	1.77857
Sikukia_stejnegeri	11142.3	0.6	176	7474.65	0.0115732	0.0100778	1.15732	1.00778	12.9206	0.0101319	0.00981523	0.981523	207	1.01319	0.0624184
Sillago_sihama	14137.6	0.7	11	796.92	0.14165	0.113354	14.165	11.3354	19.9761	0.113354	0.100999	10.0999	22	11.3354	0.908004
Sineuchiloglanis_gracilicaudata	957.982	0.3	37	1749.32	0.035947	0.0338078	3.5947	3.38078	5.951	0.0351823	0.0338076	3.38076	110	3.51823	0.0541
Sineuchiloglanis_myzostoma	5155.51	0.5	15	870.22	0.0951616	0.0861354	9.51616	8.61354	9.48513	0.0950357	0.0861354	8.61354	40	9.50357	0.237128
Sineuchiloglanis_prolixdorsalis	1104.4	0.3	5	221.65	0.232982	0.2	23.2982	20	14.1564	0.232982	0.2	20	7	23.2982	2.02234
Sinibotia_longiventralis	7894.83	0.6	260	10687	0.00816563	0.00558532	0.816563	0.558532	31.5997	0.00626906	0.00538731	0.538731	747	0.626906	0.0423021
Sinibotia_superciliaris	20428.4	0.7	51	2532.59	0.0423865	0.0234871	4.23865	2.34871	44.5881	0.0334253	0.0229696	2.29696	264	3.34253	0.168894
Sinibrama_affinis	33237.5	0.8	8	221.89	0.394981	0.319655	39.4981	31.9655	19.0709	0.3829	0.304896	30.4896	2	38.29	9.53543
Sinibrama_melrosei	33574.1	0.8	6	371.67	0.365461	0.353801	36.5461	35.3801	3.19057	0.353801	0.340055	34.0055	7	35.3801	0.455796
Speolabeo_musaei	1305.56	0.4	7	458.97	0.15046	0.150119	15.046	15.0119	0.226617	0.150119	0.149779	14.9779	7	15.0119	0.0323739
Sphyraena_jello	644658	0.9	9	664.93	0.417117	0.223672	41.7117	22.3672	46.3767	0.223672	0.160382	16.0382	22	22.3672	2.10803
Sphyraena_obtusata	20456	0.7	3	175.1	0.346739	0.346739	34.6739	34.6739	-1.27695e-08	0.346739	0.346739	34.6739	0	34.6739	0
Spinibarbus_caldwelli	18288.1	0.7	9	634.57	0.152734	0.142073	15.2734	14.2073	6.9796	0.142582	0.142073	14.2073	87	14.2582	0.0802253
Squalidus_atromaculatus	13830.7	0.7	4	289.32	0.417389	0.41727	41.7389	41.727	0.0283217	0.41727	0.41727	41.727	6	41.727	0.00472029
Stenogobius_genivittatus	19101.4	0.7	2	77.31	0.591089	0.591089	59.1089	59.1089	3.31655e-08	0.591089	0.591089	59.1089	0	59.1089	0
Stenogobius_gymnopomus	11952.5	0.6	2	77.31	0.543638	0.543638	54.3638	54.3638	3.75794e-08	0.543638	0.543638	54.3638	0	54.3638	0
Stenogobius_mekongensis	3199.31	0.5	40	2507.62	0.0359025	0.0334183	3.59025	3.34183	6.91941	0.0334183	0.032696	3.2696	40	3.34183	0.172985
Stenogobius_ophthalmoporus	12740.8	0.7	85	4698.73	0.0287506	0.0190028	2.87506	1.90028	33.9047	0.0218414	0.0180636	1.80636	168	2.18414	0.201814
Stigmatogobius_pleurostigma	1958.25	0.4	11	730.29	0.0924556	0.0922937	9.24556	9.22937	0.175045	0.0922937	0.0921691	9.21691	11	9.22937	0.0159132
Stigmatogobius_sadanundio	2336.92	0.4	7	580.97	0.151114	0.14527	15.1114	14.527	3.86696	0.14527	0.14313	14.313	22	14.527	0.175771
Stolephorus_baganensis	1221.17	0.4	2	118.29	0.50001	0.5	50.001	50	0.00187547	0.5	0.5	50	9	50	0.000208386
Stolephorus_commersonnii	1706.83	0.4	3	175.1	0.333398	0.333398	33.3398	33.3398	1.10925e-07	0.333398	0.333398	33.3398	0	33.3398	0
Stolephorus_dubiosus	329.871	0.3	10	642.25	0.118624	0.118624	11.8624	11.8624	2.2636e-07	0.118624	0.118624	11.8624	4	11.8624	5.65901e-08
Stolephorus_indicus	7471.32	0.6	7	546.64	0.181955	0.159381	18.1955	15.9381	12.4068	0.159381	0.148401	14.8401	13	15.9381	0.954365
Strongylura_leiurus	16251.8	0.7	7	580.97	0.204172	0.160539	20.4172	16.0539	21.3708	0.160539	0.145901	14.5901	22	16.0539	0.971399
Strongylura_strongylura	7386.2	0.6	22	1307.18	0.0683901	0.060972	6.83901	6.0972	10.8468	0.060972	0.0565656	5.65656	29	6.0972	0.374026
Sundasalanx_mekongensis	2888.74	0.5	435	20493.7	0.00383259	0.00313237	0.383259	0.313237	18.2702	0.0031695	0.00305973	0.305973	935	0.31695	0.0195403
Sundasalanx_praecox	2116.47	0.4	192	8277.38	0.00770707	0.00712589	0.770707	0.712589	7.5409	0.00714329	0.00701579	0.701579	212	0.714329	0.0355703
Syncrossus_beauforti	29102.1	0.8	188	7204.06	0.019604	0.0152921	1.9604	1.52921	21.9954	0.0163055	0.0148784	1.48784	156	1.63055	0.140996
Syncrossus_helodes	45693.8	0.8	427	18485.6	0.0102374	0.00601011	1.02374	0.601011	41.2928	0.00628385	0.00562842	0.562842	662	0.628385	0.0623758
Syncrossus_hymenophysa	28068.3	0.8	612	24085.8	0.00824824	0.00315252	0.824824	0.315252	61.7795	0.00356434	0.00292063	0.292063	2044	0.356434	0.0302248
Systomus_jacobusboehlkei	6426.4	0.6	14	910.4	0.109747	0.0982692	10.9747	9.82692	10.458	0.105688	0.0981282	9.81282	30	10.5688	0.3486
Systomus_orphoides	7746.97	0.6	302	12694.1	0.0069282	0.00550838	0.69282	0.550838	20.4934	0.00563678	0.00537492	0.537492	527	0.563678	0.0388868
Taenioides_cirratus	5460.85	0.6	25	1658.31	0.0630179	0.0585841	6.30179	5.85841	7.03591	0.0585841	0.0559236	5.59236	30	5.85841	0.23453
Taenioides_gracilis	4203.07	0.5	7	449.94	0.145213	0.145213	14.5213	14.5213	0.000365154	0.145213	0.145212	14.5212	1	14.5213	0.000365154
Taenioides_nigrimarginatus	2214.42	0.4	15	1071.76	0.0707212	0.0683566	7.07212	6.83566	3.34358	0.0683566	0.0672289	6.72289	23	6.83566	0.145373
Telatrygon_zugei	32642.4	0.8	9	664.93	0.245337	0.16382	24.5337	16.382	33.2265	0.16382	0.133047	13.3047	22	16.382	1.51029
Tenualosa_reevesii	84853.6	0.9	16	544.88	0.346406	0.309284	34.6406	30.9284	10.7162	0.309284	0.309284	30.9284	0	30.9284	10.7162
Tenualosa_thibaudeaui	57682.7	0.8	189	8519.22	0.0218546	0.0155271	2.18546	1.55271	28.9528	0.0157296	0.0145837	1.45837	281	1.57296	0.103035
Tenualosa_toli	11227.2	0.6	35	1719.74	0.0534943	0.0509335	5.34943	5.09335	4.78705	0.0509335	0.0509335	5.09335	22	5.09335	0.217593
Terapon_jarbua	13814.8	0.7	18	1044.39	0.109983	0.0914723	10.9983	9.14723	16.8308	0.0914723	0.0808917	8.08917	23	9.14723	0.731772
Terapon_theraps	23193.4	0.7	22	1629.31	0.0905687	0.0725121	9.05687	7.25121	19.9369	0.0725121	0.0634995	6.34995	39	7.25121	0.511202
Terateleotris_aspro	1773.85	0.4	15	854.74	0.0767968	0.0751487	7.67968	7.51487	2.14602	0.075638	0.0750749	7.50749	9	7.5638	0.238447
Thryssocypris_tonlesapensis	3833.74	0.5	188	9357.46	0.00855272	0.00790907	0.855272	0.790907	7.52559	0.0079383	0.00779885	0.779885	159	0.79383	0.0473307
Thynnichthys_thynnoides	25067.4	0.7	556	24382.9	0.00514017	0.00339579	0.514017	0.339579	33.9362	0.00354241	0.0032377	0.32377	1139	0.354241	0.0297947
Tonlesapia_tsukawakii	1162.99	0.4	59	3148.14	0.0235689	0.022681	2.35689	2.2681	3.76734	0.022681	0.0225756	2.25756	43	2.2681	0.0876127
Tor_ater	22363.2	0.7	9	739.6	0.148045	0.129613	14.8045	12.9613	12.4504	0.139428	0.1276	12.76	11	13.9428	1.13185
Tor_laterivittatus	110126	0.9	362	14714.5	0.0270755	0.0101341	2.70755	1.01341	62.5709	0.0139137	0.00910574	0.910574	574	1.39137	0.109009
Tor_mekongensis	148222	0.9	17	603.36	0.272419	0.207689	27.2419	20.7689	23.7613	0.233223	0.207689	20.7689	16	23.3223	1.48508
Tor_polylepis	4172.05	0.5	58	2442.01	0.0267136	0.0208313	2.67136	2.08313	22.0197	0.0235052	0.0204729	2.04729	179	2.35052	0.123015
Tor_sinensis	115505	0.9	519	23328.2	0.0188445	0.00638934	1.88445	0.638934	66.0944	0.00892327	0.00566889	0.566889	973	0.892327	0.0679285
Tor_tambra	418633	0.9	984	42971.4	0.0128689	0.00335753	1.28689	0.335753	73.9098	0.00413689	0.0029369	0.29369	2802	0.413689	0.0263775
Tor_tambroides	269792	0.9	982	42715.2	0.0129154	0.00336915	1.29154	0.336915	73.9136	0.00414931	0.0029468	0.29468	2782	0.414931	0.0265685
Toxabramis_houdemeri	18267.1	0.7	23	817.07	0.118723	0.0694268	11.8723	6.94268	41.5218	0.0954412	0.0686489	6.86489	39	9.54412	1.06466
Toxabramis_maensis	18048.5	0.7	36	1328.34	0.0802538	0.0394651	8.02538	3.94651	50.8247	0.051189	0.0366083	3.66083	89	5.1189	0.571063
Toxotes_chatareus	72714.5	0.8	105	4497.08	0.0352024	0.0279653	3.52024	2.79653	20.5587	0.0287476	0.0261803	2.61803	64	2.87476	0.321229
Toxotes_jaculatrix	35763	0.8	8	692.86	0.235861	0.231508	23.5861	23.1508	1.84536	0.231508	0.231265	23.1265	7	23.1508	0.263623
Toxotes_microlepis	26857.2	0.7	811	33459.8	0.00367817	0.00215519	0.367817	0.215519	41.4058	0.00229895	0.00204958	0.204958	2001	0.229895	0.0206926
Tremeuchiloglanis_abbreviata	1214.35	0.4	6	257.62	0.195791	0.166667	19.5791	16.6667	14.8753	0.194712	0.166667	16.6667	15	19.4712	0.991686
Trichiurus_lepturus	154567	0.9	3	123.11	0.624821	0.356294	62.4821	35.6294	42.9767	0.356294	0.333463	33.3463	12	35.6294	3.58139
Trichopodus_leerii	652.001	0.3	1	10.61	1	1	100	100	0	1	1		1		0
Trichopodus_microlepis	17763	0.7	284	12420.5	0.00982887	0.00721891	0.982887	0.721891	26.5541	0.00732258	0.00696246	0.696246	499	0.732258	0.0532146
Trichopodus_pectoralis	16839.4	0.7	425	17696.9	0.00654882	0.00432349	0.654882	0.432349	33.9806	0.00444596	0.00415298	0.415299	844	0.444596	0.0402614
Trichopodus_trichopterus	14425.2	0.7	751	30760.6	0.00400881	0.00228398	0.400881	0.228398	43.026	0.00239138	0.00217359	0.217359	2210	0.239138	0.0194688
Trichopsis_pumila	2316.18	0.4	541	22173.8	0.00281574	0.00239402	0.281574	0.239402	14.977	0.00243379	0.00234447	0.234447	1261	0.243379	0.0118771
Trichopsis_schalleri	3087.32	0.5	530	21447.7	0.0033513	0.00264866	0.33513	0.264866	20.9663	0.00270103	0.00257936	0.257936	1345	0.270103	0.0155883
Trichopsis_vittata	4913.75	0.5	620	25048.8	0.00291155	0.00215784	0.291155	0.215784	25.887	0.00219322	0.00211153	0.211153	1911	0.219322	0.0135463
Trigonopoma_pauciperforatum	7435.57	0.6	7	118.55	0.272587	0.272587	27.2587	27.2587	3.76354e-08	0.272587	0.272587	27.2587	0	27.2587	0
Triplophysa_brevicauda	3707.3	0.5	56	2659.86	0.0273885	0.0241835	2.73885	2.41835	11.7019	0.0267379	0.0241809	2.41809	90	2.67379	0.130021
Triplophysa_dorsalis	887.719	0.3	1	73.46	1	1	100	100	0	1	1		15		0
Triplophysa_jianchuanensis	1073.4	0.3	5	324.79	0.231198	0.2	23.1198	20	13.4941	0.231196	0.2	20	39	23.1196	0.346002
Triplophysa_leptosoma	1402.19	0.4	1	73.46	1	1	100	100	0	1	1		15		0
Triplophysa_microps	1655.65	0.4	106	3766.2	0.0139865	0.0128491	1.39865	1.28491	8.13217	0.0132632	0.0127712	1.27712	115	1.32632	0.0707145
Triplophysa_stenura	5773.82	0.6	50	2405.55	0.0351153	0.0289324	3.51153	2.89324	17.6074	0.0325877	0.0289208	2.89208	142	3.25877	0.123996
Triplophysa_stolickai	6761.88	0.6	117	4504.44	0.0174203	0.0150519	1.74203	1.50519	13.5955	0.0156736	0.014866	1.4866	178	1.56736	0.0763791
Troglocyclocheilus_khammouanensis	1103.82	0.3	4	276.76	0.339458	0.339458	33.9458	33.9458	5.67304e-08	0.339458	0.339458	33.9458	0	33.9458	0
Trypauchen_vagina	4640.05	0.5	15	1071.76	0.0761139	0.0711012	7.61139	7.11012	6.58578	0.0711012	0.0685962	6.85962	23	7.11012	0.286338
Trypauchenopsis_intermedia	4251.51	0.5	9	527.25	0.116787	0.116786	11.6787	11.6786	0.000278082	0.116786	0.116786	11.6786	1	11.6786	0.000278082
Tuberoschistura_cambodgiensis	573.715	0.3	33	1431.97	0.0434322	0.0405446	4.34322	4.05446	6.64858	0.0405446	0.0405243	4.05243	38	4.05446	0.174963
Typhlachirus_elongatus	2232.01	0.4	38	2050.13	0.0339041	0.0326387	3.39041	3.26387	3.73238	0.0326387	0.0323845	3.23845	34	3.26387	0.109776
Urogymnus_polylepis	697683	0.9	8	237.77	0.581893	0.581893	58.1893	58.1893	1.74091e-08	0.581893	0.581893	58.1893	0	58.1893	0
Vanmanenia_microcephala	1428.12	0.4	10	435.95	0.114547	0.103546	11.4547	10.3546	9.60371	0.11237	0.103546	10.3546	58	11.237	0.165581
Vanmanenia_serrilineata	1480.53	0.4	72	2379.19	0.021912	0.0200224	2.1912	2.00224	8.62333	0.0213476	0.0196921	1.96921	76	2.13476	0.113465
Vanmanenia_striata	3649.83	0.5	57	3157.46	0.025098	0.0194042	2.5098	1.94042	22.6862	0.0229874	0.0189459	1.89459	234	2.29874	0.0969495
Vanmanenia_tetraloba	3214.37	0.5	74	3831.97	0.0198169	0.0154091	1.98169	1.54091	22.2425	0.0179156	0.0152877	1.52877	351	1.79156	0.063369
Wallago_attu	462015	0.9	879	37402.2	0.0147961	0.0037834	1.47961	0.37834	74.4298	0.00458563	0.00333659	0.333659	2446	0.458563	0.0304292
Wallagonia_leerii	220806	0.9	46	2057.09	0.135114	0.113657	13.5114	11.3657	15.8801	0.113657	0.111884	11.1884	23	11.3657	0.690441
Wallagonia_micropogon	3158.64	0.5	616	26657	0.00280381	0.00212354	0.280381	0.212354	24.2626	0.00216326	0.00207206	0.207206	1928	0.216326	0.0125843
Xenentodon_cancila	32898.1	0.8	501	19054.5	0.0101555	0.00380937	1.01555	0.380937	62.4894	0.00403103	0.00358617	0.358617	1874	0.403103	0.0333455
Xenentodon_canciloides	34580.9	0.8	552	26000.1	0.00745357	0.00394192	0.745357	0.394192	47.1136	0.00443402	0.00369363	0.369363	1211	0.443402	0.0389047
Yarica_hyalosoma	4973.93	0.5	30	2195.58	0.0430381	0.0393872	4.30381	3.93872	8.48307	0.0393872	0.0382697	3.82697	48	3.93872	0.176731
Yasuhikotakia_caudipunctata	10614.8	0.6	172	7314.2	0.0114671	0.00892619	1.14671	0.892619	22.1584	0.00919975	0.00858404	0.858404	286	0.919975	0.0774769
Yasuhikotakia_eos	7198.56	0.6	466	21731.6	0.00429333	0.00313565	0.429333	0.313565	26.9645	0.00320458	0.0030412	0.304121	1069	0.320458	0.0252241
Yasuhikotakia_lecontei	18470.4	0.7	279	11631.7	0.00965877	0.00711975	0.965877	0.711975	26.2872	0.00717572	0.0068583	0.68583	390	0.717572	0.0674032
Yasuhikotakia_longidorsalis	11375.4	0.6	19	530.45	0.110726	0.0995593	11.0726	9.95593	10.085	0.0995593	0.0995593	9.95593	8	9.95593	1.26062
Yasuhikotakia_modesta	44047.1	0.8	292	12588.2	0.0143733	0.00881625	1.43733	0.881625	38.6625	0.00897241	0.00826573	0.826573	459	0.897241	0.0842319
Yasuhikotakia_morleti	7800.57	0.6	260	11437.4	0.00789947	0.00630274	0.789947	0.630274	20.2131	0.00632303	0.00612388	0.612388	447	0.632303	0.0452194
Yasuhikotakia_splendida	2349.35	0.4	19	530.45	0.082399	0.0792492	8.2399	7.92492	3.82256	0.0792492	0.0792492	7.92492	8	7.92492	0.47782
Yunnanilus_pleurotaenia	263.886	0.3	1	160.47	1	1	100	100	0	1	1		18		0
Zacco_platypus	30455.7	0.8	3	248.94	0.415439	0.333333	41.5439	33.3333	19.7636	0.404243	0.333333	33.3333	35	40.4243	0.564676
Zenarchopterus_buffonis	15164.3	0.7	45	3049.24	0.050247	0.0422351	5.0247	4.22351	15.945	0.0422351	0.0393009	3.93009	57	4.22351	0.279736
Zenarchopterus_clarus	18032.5	0.7	21	1169.82	0.0879893	0.0779329	8.79893	7.79329	11.4291	0.0779329	0.0746292	7.46292	19	7.79329	0.601531
Zenarchopterus_dunckeri	773.28	0.3	1	158.89	1	1	100	100	0	1	1		4		0
Zenarchopterus_ectuntio	10816.5	0.6	735	31820.3	0.0029523	0.00198182	0.29523	0.198182	32.8719	0.00203956	0.00191938	0.191938	2161	0.203956	0.0152114
Zenarchopterus_gilli	12988.5	0.7	41	2433.11	0.0578767	0.0482593	5.78767	4.82593	16.617	0.0482593	0.0447254	4.47254	50	4.82593	0.33234
Zenarchopterus_pappenheimi	13821.6	0.7	7	247.47	0.215161	0.210268	21.5161	21.0268	2.27447	0.210268	0.203737	20.3737	1	21.0268	2.27447

## Sheet: Sheet8
pci_0.5*100	pci_remove*100		species_name	Family	Order	Migratory	IUCN	pci_0.5*100	pci_remove*100	fragment	remove	fragment	remove	fi	fi_aver
4.3826	4.52807	0.145468	Aaptosyax_grypus	Cyprinidae	Cypriniformes	potamodromous	Critically Endangered	4.3826	4.52807	0.641732	0.655913	0.641732	0.655913	32.7618	0.330927
18.0003	18.0003	-3.06954e-08	Acanthopagrus_berda	Sparidae	Acanthuriformes	NA	Least Concern	18.0003	18.0003	1.25528	1.25528	1.25528	1.25528	21.7276	1.14356
0.235044	0.238374	0.00332979	Acanthopsoides_delphax	Cobitidae	Cypriniformes	potamodromous	Least Concern	0.235044	0.238374	-0.628851	-0.622741	-0.628851	-0.622741	12.8966	0.0116501
0.279311	0.283436	0.00412544	Acanthopsoides_gracilentus	Cobitidae	Cypriniformes	NA	Least Concern	0.279311	0.283436	-0.553912	-0.547545	-0.553912	-0.547545	18.6996	0.0130767
0.233365	0.236078	0.00271232	Acanthopsoides_gracilis	Cobitidae	Cypriniformes	NA	Least Concern	0.233365	0.236078	-0.631964	-0.626944	-0.631964	-0.626944	16.2753	0.0101341
0.212472	0.215161	0.00268886	Acanthopsoides_hapalias	Cobitidae	Cypriniformes	NA	Least Concern	0.212472	0.215161	-0.672698	-0.667236	-0.672698	-0.667236	17.0439	0.0100376
0.840712	0.843526	0.00281341	Acanthopsoides_molobrion	Cobitidae	Cypriniformes	NA	Least Concern	0.840712	0.843526	-0.0753528	-0.0739015	-0.075353	-0.073902	18.5413	0.0213856
10.5164	10.5164	4.8857e-08	Acantopsis_bruinen	Cobitidae	Cypriniformes	NA	NE/DD	10.5164	10.5164	1.02187	1.02187	1.02187	1.02187	1.37739	0.137739
0.266519	0.276945	0.0104262	Acantopsis_dialuzona	Cobitidae	Cypriniformes	NA	Least Concern	0.266519	0.276945	-0.574272	-0.557606	-0.574272	-0.557606	37.9912	0.0233648
21.6588	42.1305	20.4717	Acantopsis_ioa	Cobitidae	Cypriniformes	NA	NE/DD	21.6588	42.1305	1.33563	1.6246	1.33563	1.6246	48.5912	24.2956
1.45527	1.47769	0.0224175	Acantopsis_spectabilis	Cobitidae	Cypriniformes	NA	NE/DD	1.45527	1.47769	0.162944	0.169583	0.162944	0.169583	20.0101	0.118403
8.63919	8.63919	-4.64002e-08	Acentrogobius_caninus	Gobiidae	Gobiiformes	amphidromous	Least Concern	8.64	8.64	0.936514	0.936514	0.936514	0.936514	5.57423	0.242358
12.7678	12.7678	2.72919e-08	Acentrogobius_viridipunctatus	Gobiidae	Gobiiformes	amphidromous	Least Concern	12.77	12.77	1.10619	1.10619	1.10619	1.10619	0.605942	0.0865632
2.48495	2.72236	0.237405	Acheilognathus_barbatulus	Acheilognathidae	Cypriniformes	NA	Least Concern	2.48495	2.72236	0.395318	0.434945	0.395318	0.434945	18.0895	0.119798
1.79659	2.03709	0.240501	Acheilognathus_deignani	Acheilognathidae	Cypriniformes	NA	NE/DD	1.79659	2.03709	0.25445	0.309011	0.25445	0.309011	23.3153	0.182151
7.60903	8.00834	0.399316	Achiroides_leucorhynchos	Soleidae	Carangiformes	NA	Least Concern	7.60903	8.00834	0.881329	0.903543	0.881329	0.903543	12.3111	0.820743
2.13776	2.16746	0.0296967	Achiroides_melanorhynchus	Soleidae	Carangiformes	NA	Least Concern	2.13776	2.16746	0.329959	0.33595	0.329959	0.33595	11.1153	0.126311
33.3333	33.3333	3.33333e-08	Acrossocheilus_aluoiensis	Cyprinidae	Cypriniformes	NA	NE/DD	33.3333	33.3333	1.52288	1.52288	1.52288	1.52288	45.8795	11.4699
46.3484	46.3484	3.34681e-08	Acrossocheilus_iridescens	Cyprinidae	Cypriniformes	NA	NE/DD	46.3484	46.3484	1.66604	1.66604	1.66603	1.66603	0.498437	0.0830729
18.2201	18.2201	-3.73192e-08	Acrossocheilus_xamensis	Cyprinidae	Cypriniformes	NA	NE/DD	18.2201	18.2201	1.26055	1.26055	1.26055	1.26055	33.0513	3.00466
1.36596	1.59889	0.232926	Ageneiogarra_imberba	Cyprinidae	Cypriniformes	NA	NE/DD	1.36596	1.59889	0.135439	0.203819	0.135439	0.203819	24.1092	0.0626213
3.76351	4.09812	0.334605	Ageneiogarra_theunensis	Cyprinidae	Cypriniformes	NA	Least Concern	3.76351	4.09812	0.575593	0.612584	0.575593	0.612584	9.37795	0.234449
15.7441	15.7441	2.73974e-08	Akysis_bilustris	Akysidae	Siluriformes	NA	NE/DD	15.7441	15.7441	1.19712	1.19712	1.19712	1.19712	0.020266	0.00506649
6.12321	6.54666	0.423449	Akysis_brachybarbatus	Akysidae	Siluriformes	NA	NE/DD	6.12321	6.54666	0.786979	0.81602	0.786979	0.81602	6.88716	0.120827
2.1559	2.1675	0.0116002	Akysis_ephippifer	Akysidae	Siluriformes	NA	NE/DD	2.1559	2.1675	0.333629	0.33596	0.333629	0.33596	3.77046	0.0639062
2.82181	2.83829	0.0164804	Akysis_fuliginatus	Akysidae	Siluriformes	NA	NE/DD	2.82181	2.83829	0.450528	0.453057	0.450528	0.453057	5.03692	0.17989
0.7856	0.789898	0.00429807	Akysis_varius	Akysidae	Siluriformes	NA	NE/DD	0.7856	0.789898	-0.104799	-0.102429	-0.104799	-0.102429	17.4465	0.0258466
0.367353	0.389395	0.0220419	Albulichthys_albuloides	Cyprinidae	Cypriniformes	NA	Least Concern	0.367353	0.389395	-0.434916	-0.40961	-0.434916	-0.40961	50.6439	0.0336952
15.2279	15.2279	4.44357e-08	Allenbatrachus_grunniens	Batrachoididae	Batrachoidiformes	amphidromous	NE/DD	15.23	15.23	1.1827	1.1827	1.1827	1.1827	12.5359	0.569815
2.66658	2.71165	0.0450715	Altigena_elegans	Cyprinidae	Cypriniformes	NA	Near Threatened	2.66658	2.71165	0.425954	0.433233	0.425954	0.433233	14.7776	0.197035
18.4925	18.4925	-3.796e-08	Altigena_laticeps	Cyprinidae	Cypriniformes	NA	NE/DD	18.4925	18.4925	1.267	1.267	1.267	1.267	3.51382	0.878454
0.921677	0.989461	0.0677837	Altigena_lippa	Cyprinidae	Cypriniformes	NA	NE/DD	0.921677	0.989461	-0.0354212	-0.00460132	-0.035421	-0.004601	12.7383	0.0423198
5.28001	6.40686	1.12685	Altigena_tonkinensis	Cyprinidae	Cypriniformes	NA	Vulnerable	5.28001	6.40686	0.722635	0.806645	0.722635	0.806645	21.4846	0.671393
0.157104	0.162367	0.00526335	Altigena_yunnanensis	Cyprinidae	Cypriniformes	NA	NE/DD	0.157104	0.162367	-0.803813	-0.789502	-0.803813	-0.789502	24.8169	0.00953763
11.1333	12.7674	1.63412	Altigena_zhui	Cyprinidae	Cypriniformes	NA	NE/DD	11.1333	12.7674	1.04662	1.1061	1.04662	1.1061	13.7643	0.335714
2.1324	2.23572	0.103318	Ambassis_gymnocephalus	Ambassidae	Cichliformes	amphidromous	Least Concern	2.13	2.24	0.32838	0.350248	0.32838	0.350248	17.207	0.147068
4.62192	4.62192	-4.2266e-08	Ambassis_urotaenia	Ambassidae	Cichliformes	amphidromous	Least Concern	4.62	4.62	0.664642	0.664642	0.664642	0.664642	6.97804	0.155068
11.1649	11.1649	3.45308e-08	Ambassis_vachellii	Ambassidae	Cichliformes	amphidromous	Least Concern	11.16	11.16	1.04766	1.04766	1.04766	1.04766	0.259803	0.0112958
1.32455	1.35708	0.0325375	Ambastaia_nigrolineata	Botiidae	Cypriniformes	NA	Vulnerable	1.32455	1.35709	0.122067	0.132607	0.122067	0.132607	14.1894	0.0644971
13.8692	13.8692	2.01564e-09	Ambastaia_sidthimunki	Botiidae	Cypriniformes	NA	Endangered	13.8692	13.8692	1.14205	1.14205	1.14205	1.14205	1.45351e-08	1.32137e-09
1.61548	1.67874	0.0632613	Amblyceps_caecutiens	Amblycipitidae	Siluriformes	NA	NE/DD	1.61548	1.67874	0.208301	0.224983	0.208301	0.224983	26.2215	0.107465
0.806986	0.811619	0.00463309	Amblyceps_serratum	Amblycipitidae	Siluriformes	NA	NE/DD	0.806986	0.811619	-0.093134	-0.0906478	-0.093134	-0.090648	12.9399	0.0385116
0.30147	0.307704	0.00623447	Amblypharyngodon_chulabhornae	Danionidae	Cypriniformes	NA	Least Concern	0.30147	0.307704	-0.520756	-0.511867	-0.520756	-0.511867	23.0242	0.0214979
0.872877	0.898595	0.0257184	Amblyrhynchichthys_micracanthus	Cyprinidae	Cypriniformes	NA	Least Concern	0.872877	0.898595	-0.0590469	-0.046436	-0.059047	-0.046436	39.874	0.0789583
1.14612	1.23122	0.0850966	Amblyrhynchichthys_truncatus	Cyprinidae	Cypriniformes	potamodromous	Least Concern	1.14613	1.23122	0.059232	0.090336	0.059232	0.090336	55.8543	0.102862
0.175732	0.187686	0.0119536	Anabas_testudineus	Anabantidae	Anabantiformes	potamodromous	Least Concern	0.175732	0.187686	-0.755149	-0.726568	-0.755149	-0.726568	42.1948	0.015995
32.2708	43.7997	11.529	Anguilla_bicolor	Anguillidae	Anguilliformes	catadromous	Near Threatened	32.2708	43.7997	1.50881	1.64147	1.50881	1.64147	34.9267	0.997905
6.81934	6.88942	0.070074	Anguilla_marmorata	Anguillidae	Anguilliformes	catadromous	Least Concern	6.81934	6.88942	0.833742	0.838182	0.833742	0.838182	8.78719	0.627657
1.41888	1.53356	0.114677	Annamia_normani	Gastromyzontidae	Cypriniformes	NA	Least Concern	1.41888	1.53356	0.151947	0.185701	0.151947	0.185701	16.6444	0.0979082
10.5631	10.5631	-5.27632e-09	Anodontostoma_chacunda	Dorosomatidae	Clupeiformes	anadromous	Least Concern	10.5631	10.5631	1.02379	1.02379	1.02379	1.02379	22.7135	0.783226
0.933745	0.933747	1.72364e-06	Aplocheilus_panchax	Aplocheilidae	Cyprinodontiformes	non-migratory	Least Concern	0.933745	0.933747	-0.0297717	-0.0297708	-0.029772	-0.029771	10.9499	0.0523921
33.3843	33.3843	-8.10516e-09	Apocryptodon_madurensis	Gobiidae	Gobiiformes	amphidromous	NE/DD	33.38	33.38	1.52349	1.52349	1.52349	1.52349	0.0632087	0.0632087
15.3057	15.3057	2.60089e-10	Arius_maculatus	Ariidae	Siluriformes	potamodromous	NE/DD	15.3057	15.3057	1.18485	1.18485	1.18485	1.18485	14.3901	0.654097
25.6141	25.6141	3.14651e-08	Arius_microcephalus	Ariidae	Siluriformes	NA	NE/DD	25.6141	25.6141	1.40848	1.40848	1.40848	1.40848	11.0533	1.10533
51.6028	51.6028	1.19056e-08	Arius_nenga	Ariidae	Siluriformes	NA	NE/DD	51.6028	51.6028	1.71267	1.71267	1.71267	1.71267	12.1556	4.05186
21.3613	21.3613	-4.53178e-08	Arius_venosus	Ariidae	Siluriformes	NA	NE/DD	21.3613	21.3613	1.32963	1.32963	1.32963	1.32963	-2.12149e-07	0
22.3672	22.3672	4.68501e-08	Atule_mate	Carangidae	Carangiformes	NA	Least Concern	22.3672	22.3672	1.34961	1.34961	1.34961	1.34961	46.3767	2.10803
50	50	1.59989e-08	Aulopareia_cyanomos	Gobiidae	Gobiiformes	amphidromous	Least Concern	50	50	1.69897	1.69897	1.69897	1.69897	4.52516e-08	4.52516e-08
50	50	1.59989e-08	Aulopareia_koumansi	Gobiidae	Gobiiformes	NA	NE/DD	50	50	1.69897	1.69897	1.69897	1.69897	4.52516e-08	4.52516e-08
25	25	3.2003e-08	Aulopareia_unicolor	Gobiidae	Gobiiformes	NA	Least Concern	25	25	1.39794	1.39794	1.39794	1.39794	1.3474e-07	1.3474e-07
1.57921	1.59161	0.0124015	Auriglobus_modestus	Tetraodontidae	Tetraodontiformes	NA	Least Concern	1.57921	1.59161	0.198439	0.201836	0.198439	0.201836	9.49912	0.084063
0.935257	0.941392	0.00613516	Auriglobus_nefastus	Tetraodontidae	Tetraodontiformes	NA	Least Concern	0.935257	0.941392	-0.029069	-0.0262295	-0.029069	-0.026229	24.9129	0.0892937
3.22868	3.22868	1.69395e-08	Awaous_grammepomus	Gobiidae	Gobiiformes	amphidromous	Least Concern	3.23	3.23	0.509203	0.509203	0.509203	0.509203	6.28444	0.114263
1.54511	1.63059	0.0854862	Badis_ruber	Badidae	Anabantiformes	NA	Least Concern	1.54511	1.63059	0.188959	0.212346	0.188959	0.212346	18.131	0.133316
2.04657	2.60011	0.553536	Bagarius_bagarius	Sisoridae	Siluriformes	potamodromous	Vulnerable	2.04657	2.60011	0.311027	0.414991	0.311027	0.414991	41.8296	0.120895
0.353633	0.42924	0.0756077	Bagarius_lica	Sisoridae	Siluriformes	potamodromous	Least Concern	0.353633	0.42924	-0.451447	-0.3673	-0.451447	-0.3673	74.296	0.0287523
0.43486	0.548507	0.113647	Bagarius_suchus	Sisoridae	Siluriformes	potamodromous	Near Threatened	0.43486	0.548507	-0.361651	-0.260818	-0.361651	-0.260818	76.199	0.0348577
0.361307	0.439295	0.0779883	Bagarius_vegrandis	Sisoridae	Siluriformes	NA	Least Concern	0.361307	0.439295	-0.442124	-0.357244	-0.442124	-0.357244	74.0287	0.0290993
35.0398	35.0398	-4.33455e-08	Bagrichthys_macracanthus	Bagridae	Siluriformes	NA	Least Concern	35.0398	35.0398	1.54456	1.54456	1.54456	1.54456	35.4445	1.10764
4.68456	4.77196	0.0874071	Bagrichthys_macropterus	Bagridae	Siluriformes	potamodromous	Least Concern	4.68455	4.77196	0.670668	0.678697	0.670668	0.678697	11.2656	0.312934
0.456682	0.485412	0.0287294	Bagrichthys_majusculus	Bagridae	Siluriformes	NA	NE/DD	0.456682	0.485412	-0.340386	-0.313889	-0.340386	-0.313889	64.539	0.0400864
3.06377	3.36705	0.303276	Bagrichthys_obscurus	Bagridae	Siluriformes	NA	Least Concern	3.06377	3.36705	0.486256	0.527249	0.486256	0.527249	43.3245	0.185942
27.8009	27.8009	-3.67297e-08	Balantiocheilos_ambusticauda	Cyprinidae	Cypriniformes	NA	Critically Endangered	27.8009	27.8009	1.44406	1.44406	1.44406	1.44406	22.5686	4.51372
0.367603	0.390457	0.0228536	Balitora_annamitica	Balitoridae	Cypriniformes	NA	Least Concern	0.367603	0.390457	-0.434621	-0.408427	-0.434621	-0.408427	16.6306	0.0283798
16.678	17.1262	0.448196	Balitora_brucei	Balitoridae	Cypriniformes	NA	Near Threatened	16.678	17.1262	1.22214	1.23366	1.22215	1.23366	3.6343	0.259593
23.7282	23.7282	1.99933e-08	Balitora_kwangsiensis	Balitoridae	Cypriniformes	NA	Least Concern	23.7282	23.7282	1.37527	1.37527	1.37527	1.37527	6.45538	3.22769
0.530418	0.564656	0.0342371	Balitora_lancangjiangensis	Balitoridae	Cypriniformes	NA	Least Concern	0.530418	0.564656	-0.275382	-0.248216	-0.275382	-0.248216	18.2101	0.036788
0.781229	0.784164	0.00293502	Balitoropsis_zollingeri	Balitoridae	Cypriniformes	NA	Least Concern	0.781229	0.784164	-0.107222	-0.105593	-0.107222	-0.105593	12.6783	0.049332
7.78851	9.17591	1.3874	Bangana_brevirostris	Cyprinidae	Cypriniformes	NA	NE/DD	7.78851	9.17591	0.891454	0.962649	0.891454	0.962649	25.9998	1.29999
45.4562	45.4562	5.14657e-09	Bangana_devdevi	Cyprinidae	Cypriniformes	NA	Least Concern	45.4562	45.4562	1.65759	1.65759	1.65759	1.65759	34.4356	4.30445
25.4839	32.139	6.65507	Bangana_diplostomus	Cyprinidae	Cypriniformes	NA	Least Concern	25.4839	32.139	1.40627	1.50703	1.40627	1.50703	59.2157	3.70098
33.3333	33.3333	3.33333e-08	Barbatula_barbatula	Nemacheilidae	Cypriniformes	potamodromous	Least Concern	33.3333	33.3333	1.52288	1.52288	1.52288	1.52288	1.14155e-05	3.68243e-07
0.307763	0.325029	0.0172663	Barbichthys_laevis	Cyprinidae	Cypriniformes	NA	Least Concern	0.307763	0.325029	-0.511784	-0.488078	-0.511784	-0.488078	56.9011	0.0281271
0.848002	0.857082	0.00908082	Barbodes_aurotaeniatus	Cyprinidae	Cypriniformes	NA	Least Concern	0.848002	0.857082	-0.0716031	-0.0669776	-0.071603	-0.066978	16.499	0.0611073
2.607	2.66952	0.0625211	Barbodes_binotatus	Cyprinidae	Cypriniformes	NA	Least Concern	2.607	2.66952	0.416142	0.426434	0.416142	0.426434	21.969	0.354339
0.507087	0.515398	0.00831103	Barbodes_rhombeus	Cyprinidae	Cypriniformes	NA	Least Concern	0.507087	0.515398	-0.294918	-0.287857	-0.294918	-0.287857	12.3337	0.0395312
2.87153	3.18823	0.3167	Barbodes_semifasciolatus	Cyprinidae	Cypriniformes	NA	Least Concern	2.87153	3.18823	0.458113	0.503549	0.458113	0.503549	18.5689	0.18028
0.2816	0.299618	0.0180189	Barbonymus_altus	Cyprinidae	Cypriniformes	potamodromous	Least Concern	0.2816	0.299618	-0.550367	-0.523432	-0.550367	-0.523432	56.0589	0.0256211
0.939362	1.02864	0.0892807	Barbonymus_gonionotus	Cyprinidae	Cypriniformes	potamodromous	Least Concern	0.939362	1.02864	-0.027167	0.0122643	-0.027167	0.012264	61.0689	0.0570737
0.639289	0.690433	0.0511442	Barbonymus_schwanefeldii	Cyprinidae	Cypriniformes	potamodromous	Least Concern	0.639289	0.690433	-0.194303	-0.160878	-0.194303	-0.160878	69.6479	0.0452847
50.0053	50.0053	3.22353e-09	Batrachomoeus_trispinosus	Batrachoididae	Batrachoidiformes	NA	NE/DD	50.0053	50.0053	1.69902	1.69902	1.69902	1.69902	6.44632e-09	0
10.2738	10.2738	-2.40546e-08	Belodontichthys_dinema	Siluridae	Siluriformes	potamodromous	Least Concern	10.2738	10.2738	1.01173	1.01173	1.01173	1.01173	15.0463	0.62693
0.622647	0.694136	0.0714888	Belodontichthys_truncatus	Siluridae	Siluriformes	NA	Least Concern	0.622647	0.694136	-0.205758	-0.158555	-0.205758	-0.158555	70.5889	0.0508932
20	20	0	Betta_imbellis	Osphronemidae	Anabantiformes	NA	Least Concern	20	20	1.30103	1.30103	1.30103	1.30103	14.6302	0.585207
0.854807	0.857456	0.00264893	Betta_prima	Osphronemidae	Anabantiformes	NA	Least Concern	0.854807	0.857456	-0.0681319	-0.0667882	-0.068132	-0.066788	13.1876	0.070522
50	50	0	Betta_siamorientalis	Osphronemidae	Anabantiformes	NA	NE/DD	50	50	1.69897	1.69897	1.69897	1.69897	0	0
0.381797	0.389326	0.00752918	Betta_smaragdina	Osphronemidae	Anabantiformes	NA	NE/DD	0.381797	0.389326	-0.418167	-0.409687	-0.418167	-0.409687	31.1185	0.021461
4.14135	4.14135	-7.11336e-09	Betta_splendens	Osphronemidae	Anabantiformes	NA	Vulnerable	4.14135	4.14135	0.617142	0.617142	0.617142	0.617142	9.80607	0.172036
33.8644	33.8644	3.44668e-08	Betta_stiktos	Osphronemidae	Anabantiformes	NA	NE/DD	33.8644	33.8644	1.52974	1.52974	1.52974	1.52974	0.0875063	0.0218766
0.904946	0.996901	0.0919546	Boesemania_microlepis	Sciaenidae	Acanthuriformes	potamodromous	NE/DD	0.904946	0.996901	-0.0433773	-0.00134797	-0.043377	-0.001348	62.5896	0.0641944
0.437699	0.444845	0.00714632	Boleophthalmus_boddarti	Gobiidae	Gobiiformes	amphidromous	Least Concern	0.44	0.44	-0.356547	-0.356547	-0.356547	-0.356547	40.5409	0.038684
8.79366	8.79366	4.06522e-08	Boraras_micros	Danionidae	Cypriniformes	NA	Least Concern	8.79366	8.79366	0.94417	0.94417	0.94417	0.94417	1.43818	0.130744
2.81033	2.81033	4.6522e-09	Boraras_urophthalmoides	Danionidae	Cypriniformes	NA	Near Threatened	2.81033	2.81033	0.448758	0.448758	0.448758	0.448758	2.53835	0.0528823
4.39857	4.39857	4.20447e-09	Bostrychus_sinensis	Eleotridae	Gobiiformes	amphidromous	Least Concern	4.4	4.4	0.643453	0.643453	0.643453	0.643453	5.98136	0.142413
0.403599	0.413253	0.0096538	Brachirus_harmandi	Soleidae	Carangiformes	NA	Least Concern	0.403599	0.413253	-0.39405	-0.383784	-0.39405	-0.383784	19.96	0.0338879
6.74412	7.00891	0.264795	Brachirus_orientalis	Soleidae	Carangiformes	anadromous	Least Concern	6.74412	7.00891	0.828925	0.845651	0.828925	0.845651	13.7265	0.623931
1.45005	1.46251	0.0124542	Brachirus_panoides	Soleidae	Carangiformes	NA	Least Concern	1.45005	1.4625	0.161383	0.165097	0.161383	0.165097	16.5368	0.131244
1.31014	1.32147	0.011328	Brachirus_siamensis	Soleidae	Carangiformes	NA	Least Concern	1.31014	1.32147	0.117318	0.121057	0.117318	0.121057	19.5059	0.130912
50	50	1.59989e-08	Brachyamblyopus_brachysoma	Gobiidae	Gobiiformes	NA	NE/DD	50	50	1.69897	1.69897	1.69897	1.69897	4.52516e-08	4.52516e-08
4.09135	4.09135	3.23104e-08	Brachygobius_doriae	Gobiidae	Gobiiformes	NA	Least Concern	4.09135	4.09135	0.611867	0.611867	0.611867	0.611867	1.39236	0.0331513
3.8069	3.8069	-7.47178e-09	Brachygobius_kabiliensis	Gobiidae	Gobiiformes	NA	Least Concern	3.8069	3.8069	0.580572	0.580572	0.580572	0.580572	0.595707	0.0205416
0.35264	0.355349	0.00270934	Brachygobius_mekongensis	Gobiidae	Gobiiformes	NA	Least Concern	0.35264	0.355349	-0.452668	-0.449345	-0.452668	-0.449345	10.8769	0.0143117
33.3333	33.3333	2.14499e-08	Brachygobius_sabanus	Gobiidae	Gobiiformes	NA	Least Concern	33.3333	33.3333	1.52288	1.52288	1.52288	1.52288	6.43497e-08	1.28699e-08
57.2555	57.2555	-4.58599e-08	Brevitrygon_imbricata	Dasyatidae	Myliobatiformes	amphidromous	Vulnerable	57.26	57.26	1.75785	1.75785	1.75785	1.75785	-8.0097e-08	0
8.23879	8.23879	-2.30335e-08	Butis_amboinensis	Eleotridae	Gobiiformes	amphidromous	Least Concern	8.24	8.24	0.915927	0.915927	0.915927	0.915927	3.32867	0.100869
8.21324	8.21324	4.50157e-08	Butis_butis	Eleotridae	Gobiiformes	amphidromous	Least Concern	8.21	8.21	0.914343	0.914343	0.914343	0.914343	10.2664	0.427767
33.3358	33.3358	2.48334e-08	Butis_humeralis	Eleotridae	Gobiiformes	amphidromous	NE/DD	33.34	33.34	1.52297	1.52297	1.52297	1.52297	8.68473e-05	8.68473e-05
6.87426	6.87426	2.85345e-09	Butis_koilomatodon	Eleotridae	Gobiiformes	amphidromous	Least Concern	6.87	6.87	0.836957	0.836957	0.836957	0.836957	0.667757	0.0267103
1.30803	1.33973	0.0316959	Caragobius_urolepis	Gobiidae	Gobiiformes	amphidromous	Least Concern	1.31	1.34	0.117271	0.127105	0.117271	0.127105	17.6957	0.130115
1.47321	2.13166	0.658454	Carassius_auratus	Cyprinidae	Cypriniformes	potamodromous	Least Concern	1.47321	2.13166	0.168263	0.328718	0.168263	0.328718	51.2947	0.141698
2.2368	2.2368	3.36093e-08	Carinotetraodon_lorteti	Tetraodontidae	Tetraodontiformes	NA	Least Concern	2.23679	2.23679	0.349626	0.349626	0.349626	0.349626	3.92006	0.0687731
0.612861	0.664205	0.051344	Catlocarpio_siamensis	Cyprinidae	Cypriniformes	potamodromous	Critically Endangered	0.612861	0.664205	-0.212638	-0.177698	-0.212638	-0.177698	74.1412	0.0410755
0.626123	0.646601	0.0204789	Cephalocassis_borneensis	Ariidae	Siluriformes	potamodromous	Least Concern	0.626123	0.646601	-0.20334	-0.189364	-0.20334	-0.189364	45.9386	0.0595831
24.9173	24.9173	-3.01804e-08	Cephalopholis_boenak	Epinephelidae	Perciformes	non-migratory	Least Concern	24.9173	24.9173	1.3965	1.3965	1.3965	1.3965	27.1632	2.08947
0.249026	0.270547	0.0215209	Ceratogarra_cambodgiensis	Cyprinidae	Cypriniformes	NA	Least Concern	0.249026	0.270547	-0.603755	-0.567757	-0.603755	-0.567757	55.2873	0.0231425
0.349585	0.35886	0.0092751	Ceratogarra_fasciacauda	Cyprinidae	Cypriniformes	NA	Least Concern	0.349585	0.35886	-0.456447	-0.445075	-0.456447	-0.445075	20.5745	0.0265135
51.2962	51.2962	-2.88897e-08	Channa_auroflammea	Channidae	Anabantiformes	NA	NE/DD	51.2962	51.2962	1.71009	1.71009	1.71009	1.71009	-5.63194e-08	0
0.164645	0.177122	0.0124772	Channa_gachua	Channidae	Anabantiformes	potamodromous	Least Concern	0.164645	0.177122	-0.783451	-0.751727	-0.783451	-0.751727	42.1887	0.0144829
0.235481	0.260361	0.0248798	Channa_lucius	Channidae	Anabantiformes	potamodromous	Least Concern	0.235481	0.260361	-0.628044	-0.584424	-0.628044	-0.584424	55.4849	0.0227025
6.53724	6.77056	0.233326	Channa_marulioides	Channidae	Anabantiformes	NA	Least Concern	6.53724	6.77056	0.815394	0.830625	0.815394	0.830625	7.30971	1.21828
0.499947	0.541759	0.0418121	Channa_marulius	Channidae	Anabantiformes	potamodromous	Least Concern	0.499947	0.541759	-0.301076	-0.266194	-0.301076	-0.266194	73.2861	0.0358367
0.377105	0.387092	0.00998641	Channa_melasoma	Channidae	Anabantiformes	NA	Least Concern	0.377105	0.387092	-0.423538	-0.412186	-0.423538	-0.412186	58.0422	0.0318214
0.575291	0.61981	0.0445186	Channa_micropeltes	Channidae	Anabantiformes	potamodromous	Least Concern	0.575291	0.61981	-0.240112	-0.207741	-0.240112	-0.207741	71.9436	0.0381057
7.32142	8.84457	1.52315	Channa_orientalis	Channidae	Anabantiformes	potamodromous	Vulnerable	7.32142	8.84457	0.864595	0.946677	0.864595	0.946677	20.8663	2.31848
50	50	0	Channa_punctata	Channidae	Anabantiformes	potamodromous	Least Concern	50	50	1.69897	1.69897	1.69897	1.69897	2.7099	0.142626
0.318016	0.396035	0.0780183	Channa_striata	Channidae	Anabantiformes	potamodromous	Least Concern	0.318016	0.396035	-0.497551	-0.402266	-0.497551	-0.402266	74.1782	0.0248503
42.8496	42.8496	3.76624e-08	Chanos_chanos	Chanidae	Gonorynchiformes	amphidromous	Least Concern	42.85	42.85	1.63195	1.63195	1.63195	1.63195	10.4454	1.7409
0.36163	0.36738	0.00575017	Chaudhuria_caudata	Chaudhuriidae	Synbranchiformes	NA	NE/DD	0.36163	0.36738	-0.441736	-0.434884	-0.441736	-0.434884	13.0687	0.0217812
5.98285	5.98285	-1.93828e-08	Chelonodontops_patoca	Tetraodontidae	Tetraodontiformes	anadromous	Least Concern	5.98285	5.98285	0.776908	0.776908	0.776908	0.776908	2.17628	0.083703
2.00318	2.22262	0.219442	Chitala_blanci	Notopteridae	Osteoglossiformes	potamodromous	Near Threatened	2.00318	2.22262	0.30172	0.346866	0.30172	0.346866	51.2706	0.135279
6.24865	6.24865	-4.85297e-08	Chitala_chitala	Notopteridae	Osteoglossiformes	NA	Near Threatened	6.24865	6.24865	0.795786	0.795786	0.795786	0.795786	10.974	0.609666
5.61087	5.75787	0.146999	Chitala_lopis	Notopteridae	Osteoglossiformes	NA	Extinct	5.61087	5.75787	0.74903	0.760262	0.74903	0.760262	9.54637	0.954637
0.73538	0.822906	0.0875258	Chitala_ornata	Notopteridae	Osteoglossiformes	potamodromous	Least Concern	0.73538	0.822906	-0.133488	-0.0846498	-0.133488	-0.08465	66.8606	0.0547589
0.957958	0.992327	0.0343695	Cirrhinus_jullieni	Cyprinidae	Cypriniformes	potamodromous	NE/DD	0.957958	0.992327	-0.0186535	-0.00334519	-0.018654	-0.003345	35.7475	0.0688776
1.25619	1.38864	0.132455	Cirrhinus_microlepis	Cyprinidae	Cypriniformes	potamodromous	Vulnerable	1.25619	1.38864	0.0990543	0.14259	0.099054	0.14259	55.0565	0.0955841
1.14607	1.35462	0.208542	Cirrhinus_molitorella	Cyprinidae	Cypriniformes	potamodromous	Near Threatened	1.14607	1.35462	0.059213	0.131817	0.059213	0.131817	52.2662	0.0843003
8.13446	11.8802	3.74578	Cirrhinus_mrigala	Cyprinidae	Cypriniformes	NA	Least Concern	8.13446	11.8802	0.910329	1.07483	0.910329	1.07482	46.3629	0.842961
37.137	37.137	-2.49922e-08	Cirrhinus_reba	Cyprinidae	Cypriniformes	NA	Least Concern	37.137	37.137	1.56981	1.56981	1.56981	1.56981	8.34701	1.19243
20	24.2663	4.26634	Claea_dabryi	Nemacheilidae	Cypriniformes	NA	NE/DD	20	24.2663	1.30103	1.385	1.30103	1.385	27.8282	0.409238
0.922058	1.04674	0.12468	Clarias_batrachus	Clariidae	Siluriformes	potamodromous	Least Concern	0.922058	1.04674	-0.0352418	0.019838	-0.035242	0.019838	36.9253	0.0887626
2.20863	2.51357	0.304934	Clarias_fuscus	Clariidae	Siluriformes	NA	Least Concern	2.20863	2.51357	0.344124	0.400291	0.344124	0.400291	21.7544	0.12019
1.25434	1.37825	0.123911	Clarias_macrocephalus	Clariidae	Siluriformes	potamodromous	NE/DD	1.25434	1.37825	0.0984149	0.139328	0.098415	0.139328	58.0086	0.0820489
7.00792	7.00792	2.81153e-08	Clarias_meladerma	Clariidae	Siluriformes	NA	Least Concern	7.00792	7.00792	0.845589	0.845589	0.845589	0.845589	3.26497	0.296815
3.09616	3.09616	1.92949e-08	Clarias_nieuhofii	Clariidae	Siluriformes	NA	Least Concern	3.09616	3.09616	0.490823	0.490823	0.490823	0.490823	24.0956	0.229482
0.215548	0.218326	0.00277803	Clupeichthys_aesarnensis	Ehiravidae	Clupeiformes	potamodromous	Least Concern	0.215548	0.218326	-0.666456	-0.660895	-0.666456	-0.660895	24.9557	0.0130385
7.95666	7.95666	-2.40936e-08	Clupeichthys_goniognathus	Ehiravidae	Clupeiformes	NA	Least Concern	7.95666	7.95666	0.900731	0.900731	0.900731	0.900731	8.97335	0.448667
0.968181	0.968181	8.95479e-09	Clupeoides_borneensis	Ehiravidae	Clupeiformes	NA	Least Concern	0.968181	0.968181	-0.0140434	-0.0140434	-0.014043	-0.014043	14.0367	0.0597307
2.63161	3.3711	0.739491	Clupisoma_longianale	Ailiidae	Siluriformes	NA	NE/DD	2.63161	3.3711	0.420222	0.527772	0.420222	0.527772	38.692	0.181653
0.204455	0.230984	0.0265285	Clupisoma_sinense	Ailiidae	Siluriformes	potamodromous	Least Concern	0.204455	0.230984	-0.689402	-0.636418	-0.689402	-0.636418	55.5318	0.0188307
1.47941	1.48716	0.00774532	Cobitis_arenae	Cobitidae	Cypriniformes	NA	NE/DD	1.47941	1.48716	0.17009	0.172357	0.17009	0.172357	17.8232	0.098471
3.21644	3.25375	0.0373136	Cobitis_guttatus	Cobitidae	Cypriniformes	NA	NE/DD	3.21644	3.25375	0.507375	0.512385	0.507375	0.512385	3.98653	0.306656
27.7278	27.7278	-2.47787e-08	Coilia_dussumieri	Engraulidae	Clupeiformes	amphidromous	Least Concern	27.73	27.73	1.44295	1.44295	1.44295	1.44295	0.0548155	0.00783079
17.8088	17.8088	3.5131e-08	Coilia_grayii	Engraulidae	Clupeiformes	NA	Least Concern	17.8088	17.8088	1.25063	1.25063	1.25063	1.25063	0.000148817	2.97634e-05
1.69633	1.72985	0.0335231	Coilia_lindmani	Engraulidae	Clupeiformes	NA	Least Concern	1.69633	1.72985	0.22951	0.238009	0.22951	0.238009	14.5941	0.147416
4.78913	4.78913	1.45916e-08	Coilia_macrognathos	Engraulidae	Clupeiformes	NA	NE/DD	4.78913	4.78913	0.680256	0.680256	0.680256	0.680256	5.74382	0.229753
36.2103	36.2103	-2.391e-08	Coilia_mystus	Engraulidae	Clupeiformes	amphidromous	Endangered	36.21	36.21	1.55883	1.55883	1.55883	1.55883	3.18654	0.53109
11.8994	11.8994	1.87349e-08	Coilia_rebentischii	Engraulidae	Clupeiformes	NA	NE/DD	11.8994	11.8994	1.07553	1.07553	1.07553	1.07553	11.259	0.511771
33.9133	33.9133	-3.96966e-10	Coilia_reynaldi	Engraulidae	Clupeiformes	amphidromous	Least Concern	33.91	33.91	1.53033	1.53033	1.53033	1.53033	0.70333	0.117222
42.8496	42.8496	3.76624e-08	Congresox_talabon	Muraenesocidae	Anguilliformes	amphidromous	Least Concern	42.85	42.85	1.63195	1.63195	1.63195	1.63195	10.4454	1.7409
31.3746	31.3746	1.24369e-08	Coptodon_zillii	Cichlidae	Cichliformes	potamodromous	Least Concern	31.3746	31.3746	1.49658	1.49658	1.49658	1.49658	14.0547	1.17122
0.243522	0.24847	0.00494767	Corica_laciniata	Ehiravidae	Clupeiformes	NA	NE/DD	0.243522	0.24847	-0.613462	-0.604726	-0.613462	-0.604726	23.0897	0.0149351
5.64881	5.64881	1.81681e-08	Corica_soborna	Ehiravidae	Clupeiformes	NA	Least Concern	5.64881	5.64881	0.751957	0.751957	0.751957	0.751957	0.0296941	0.00247451
5.69904	13.5076	7.80859	Cosmochilus_cardinalis	Cyprinidae	Cypriniformes	NA	NE/DD	5.69904	13.5076	0.755801	1.13058	0.755801	1.13058	65.9766	0.942523
0.923232	1.04449	0.121262	Cosmochilus_harmandi	Cyprinidae	Cypriniformes	potamodromous	Least Concern	0.923232	1.04449	-0.0346892	0.0189059	-0.034689	0.018906	60.6949	0.0844157
14.7084	14.7084	-1.29043e-08	Crenimugil_seheli	Mugilidae	Mugiliformes	catadromous	Least Concern	14.7084	14.7084	1.16757	1.16757	1.16756	1.16756	35.9143	0.718286
8.58729	10.1133	1.52603	Creteuchiloglanis_kamengensis	Sisoridae	Siluriformes	NA	NE/DD	8.58729	10.1133	0.933856	1.00489	0.933856	1.00489	22.6103	0.55147
3.27808	4.26917	0.991087	Creteuchiloglanis_longipectoralis	Sisoridae	Siluriformes	NA	NE/DD	3.27808	4.26917	0.51562	0.630343	0.51562	0.630343	32.5626	0.285637
0.332071	0.344189	0.0121183	Crossocheilus_atrilimes	Cyprinidae	Cypriniformes	NA	Least Concern	0.332071	0.344189	-0.478769	-0.463203	-0.478769	-0.463203	40.894	0.0276685
0.180069	0.185308	0.0052393	Crossocheilus_cobitis	Cyprinidae	Cypriniformes	NA	Least Concern	0.180069	0.185308	-0.744561	-0.732106	-0.744561	-0.732106	31.7478	0.0139797
0.314566	0.325134	0.0105679	Crossocheilus_oblongus	Cyprinidae	Cypriniformes	NA	Least Concern	0.314566	0.325134	-0.502288	-0.487938	-0.502288	-0.487938	43.0491	0.0248839
0.306427	0.32003	0.0136029	Crossocheilus_reticulatus	Cyprinidae	Cypriniformes	NA	Least Concern	0.306427	0.32003	-0.513673	-0.494809	-0.513673	-0.494809	36.2306	0.0269373
50	58.0543	8.05428	Crossocheilus_tchangi	Cyprinidae	Cypriniformes	NA	NE/DD	50	58.0543	1.69897	1.76383	1.69897	1.76383	13.8737	13.8737
0.509757	0.528378	0.0186215	Cyclocheilichthys_apogon	Cyprinidae	Cypriniformes	NA	Least Concern	0.509757	0.528378	-0.292637	-0.277055	-0.292637	-0.277055	48.7655	0.0480448
0.250705	0.269211	0.0185061	Cyclocheilichthys_armatus	Cyprinidae	Cypriniformes	NA	Least Concern	0.250705	0.269211	-0.600837	-0.569907	-0.600837	-0.569907	54.7864	0.0231655
0.333341	0.337857	0.00451539	Cyclocheilichthys_heteronema	Cyprinidae	Cypriniformes	NA	Least Concern	0.333341	0.337857	-0.477111	-0.471267	-0.477111	-0.471267	41.637	0.0257018
1.43816	1.50142	0.063254	Cyclocheilichthys_lagleri	Cyprinidae	Cypriniformes	NA	Least Concern	1.43816	1.50142	0.157808	0.176502	0.157808	0.176502	19.7004	0.144856
0.258818	0.278953	0.0201349	Cyclocheilichthys_repasson	Cyprinidae	Cypriniformes	potamodromous	Least Concern	0.258818	0.278953	-0.587006	-0.554469	-0.587006	-0.554469	54.2979	0.0235158
0.372223	0.37973	0.0075073	Cyclocheilos_enoplos	Cyprinidae	Cypriniformes	potamodromous	Least Concern	0.372223	0.37973	-0.429197	-0.420525	-0.429197	-0.420525	29.2693	0.0279822
1.2357	1.25752	0.0218188	Cyclocheilos_furcatus	Cyprinidae	Cypriniformes	NA	NE/DD	1.2357	1.25752	0.0919145	0.0995159	0.091914	0.099516	18.719	0.0858669
14.6431	14.6431	-4.67938e-08	Cynoglossus_cynoglossus	Cynoglossidae	Carangiformes	NA	Least Concern	14.6431	14.6431	1.16563	1.16563	1.16563	1.16563	-3.19492e-07	-6.38983e-08
11.3705	11.3705	4.08603e-08	Cynoglossus_feldmanni	Cynoglossidae	Carangiformes	NA	Least Concern	11.3705	11.3705	1.05578	1.05578	1.05578	1.05578	28.9205	0.932918
13.4685	13.4685	4.91461e-08	Cynoglossus_lingua	Cynoglossidae	Carangiformes	amphidromous	Least Concern	13.47	13.47	1.12937	1.12937	1.12937	1.12937	9.93805	0.451729
1.88933	1.91257	0.0232368	Cynoglossus_microlepis	Cynoglossidae	Carangiformes	potamodromous	Least Concern	1.88933	1.91257	0.276308	0.281616	0.276308	0.281616	32.9868	0.240779
11.7998	11.7998	3.49671e-09	Cynoglossus_puncticeps	Cynoglossidae	Carangiformes	NA	Least Concern	11.7998	11.7998	1.07187	1.07187	1.07187	1.07187	17.2782	0.617079
28.5876	28.5876	-3.27969e-08	Cynoglossus_quadrilineatus	Cynoglossidae	Carangiformes	NA	Least Concern	28.5876	28.5876	1.45618	1.45618	1.45618	1.45618	10.3679	1.03679
25	25	0	Cyprinus_chilia	Cyprinidae	Cypriniformes	NA	Endangered	25	25	1.39794	1.39794	1.39794	1.39794	0.000270729	3.65849e-06
0.552096	0.641931	0.0898353	Cyprinus_rubrofuscus	Cyprinidae	Cypriniformes	NA	Least Concern	0.552096	0.641931	-0.257985	-0.192512	-0.257985	-0.192512	41.3953	0.0669827
25.8012	25.8012	4.25956e-08	Dagetichthys_commersonnii	Soleidae	Carangiformes	amphidromous	Least Concern	25.8	25.8	1.41162	1.41162	1.41162	1.41162	2.04752	0.170627
4.0148	4.0148	2.08549e-08	Danio_albolineatus	Danionidae	Cypriniformes	NA	Least Concern	4.0148	4.0148	0.603664	0.603664	0.603664	0.603664	11.0025	0.196474
0.395758	0.412757	0.0169994	Danio_roseus	Danionidae	Cypriniformes	NA	Least Concern	0.395758	0.412757	-0.40257	-0.384306	-0.40257	-0.384306	19.7738	0.0181912
6.60077	6.60077	3.14873e-08	Datnioides_microlepis	Lobotidae	Acanthuriformes	NA	Least Concern	6.60077	6.60077	0.819594	0.819594	0.819594	0.819594	23.2548	1.29194
1.07167	1.10962	0.0379441	Datnioides_polota	Lobotidae	Acanthuriformes	NA	Least Concern	1.07167	1.10962	0.0300627	0.0451735	0.030063	0.045173	43.0073	0.12954
2.8932	2.8932	4.41488e-08	Datnioides_pulcher	Lobotidae	Acanthuriformes	NA	Critically Endangered	2.8932	2.8932	0.461379	0.461379	0.461379	0.461379	19.4559	0.299322
0.675534	0.694434	0.0189	Datnioides_undecimradiatus	Lobotidae	Acanthuriformes	potamodromous	Vulnerable	0.675534	0.694434	-0.170353	-0.158369	-0.170353	-0.158369	50.2835	0.0598614
25.4818	25.4818	1.12834e-10	Dendrophysa_russelii	Sciaenidae	Acanthuriformes	amphidromous	Least Concern	25.48	25.48	1.4062	1.4062	1.4062	1.4062	1.59054	0.176727
16.6783	16.6783	-3.18688e-08	Dermogenys_orientalis	Zenarchopteridae	Beloniformes	NA	Vulnerable	16.6783	16.6783	1.22215	1.22215	1.22215	1.22215	-1.91079e-07	-3.18464e-08
3.98706	3.98706	2.16372e-08	Dermogenys_pusilla	Zenarchopteridae	Beloniformes	NA	NE/DD	3.98706	3.98706	0.600653	0.600653	0.600653	0.600653	4.50067	0.321476
0.185278	0.187392	0.00211438	Dermogenys_siamensis	Zenarchopteridae	Beloniformes	NA	Least Concern	0.185278	0.187392	-0.732176	-0.727249	-0.732176	-0.727249	18.4901	0.00920363
0.18815	0.191344	0.00319466	Desmopuntius_hexazona	Cyprinidae	Cypriniformes	NA	Least Concern	0.18815	0.191344	-0.725496	-0.718185	-0.725496	-0.718185	24.995	0.0121394
3.13605	3.44378	0.307728	Devario_acrostomus	Danionidae	Cypriniformes	NA	NE/DD	3.13605	3.44378	0.496383	0.537035	0.496383	0.537035	20.0246	0.370826
25	47.8501	22.8501	Devario_aequipinnatus	Danionidae	Cypriniformes	NA	Least Concern	25	47.8501	1.39794	1.67988	1.39794	1.67988	52.7793	10.5559
9.9981	10.9021	0.903969	Devario_apopyris	Danionidae	Cypriniformes	NA	Vulnerable	9.9981	10.9021	0.999917	1.03751	0.999917	1.03751	13.8145	0.460482
14.641	22.1023	7.46125	Devario_browni	Danionidae	Cypriniformes	NA	Vulnerable	14.641	22.1023	1.16557	1.34444	1.16557	1.34444	38.7723	2.28072
1.56428	1.64482	0.0805318	Devario_chrysotaeniatus	Danionidae	Cypriniformes	NA	NE/DD	1.56428	1.64482	0.194316	0.216118	0.194316	0.216118	13.7114	0.0646765
12.5262	12.5393	0.013027	Devario_fangfangae	Danionidae	Cypriniformes	NA	Least Concern	12.5262	12.5393	1.09782	1.09827	1.09782	1.09827	0.359953	0.0276887
2.84373	2.85671	0.0129814	Devario_gibber	Danionidae	Cypriniformes	NA	Least Concern	2.84373	2.85671	0.453888	0.455866	0.453888	0.455866	10.1694	0.221075
2.9809	2.98348	0.00258193	Devario_kysonensis	Danionidae	Cypriniformes	NA	NE/DD	2.9809	2.98348	0.474347	0.474723	0.474347	0.474723	8.6185	0.187359
0.992922	1.05154	0.0586157	Devario_laoensis	Danionidae	Cypriniformes	NA	Least Concern	0.992922	1.05154	-0.00308487	0.021825	-0.003085	0.021825	19.1965	0.0666546
1.89787	2.0207	0.122833	Devario_leptos	Danionidae	Cypriniformes	NA	Least Concern	1.89787	2.0207	0.278266	0.305502	0.278266	0.305502	14.9945	0.164774
26.7496	26.7577	0.00816776	Devario_quangbinhensis	Danionidae	Cypriniformes	NA	NE/DD	26.7496	26.7577	1.42732	1.42745	1.42732	1.42745	0.0431632	0.0215816
20	20	0	Devario_regina	Danionidae	Cypriniformes	NA	Least Concern	20	20	1.30103	1.30103	1.30103	1.30103	0.00789661	0.000151858
5.26483	5.26949	0.00466011	Devario_salmonatus	Danionidae	Cypriniformes	NA	NE/DD	5.26483	5.26949	0.721384	0.721769	0.721384	0.721769	5.33086	0.296159
50	50	9.86269e-10	Devario_subviridis	Danionidae	Cypriniformes	NA	NE/DD	50	50	1.69897	1.69897	1.69897	1.69897	1.57802e-08	2.63003e-09
17.8497	17.8497	3.2275e-08	Deveximentum_insidiator	Leiognathidae	Acanthuriformes	amphidromous	NE/DD	17.85	17.85	1.25164	1.25164	1.25164	1.25164	18.7268	1.44052
20.2423	20.2423	-4.44933e-08	Deveximentum_ruconius	Leiognathidae	Acanthuriformes	amphidromous	NE/DD	20.24	20.24	1.30621	1.30621	1.30621	1.30621	0.684862	0.114144
10.2924	10.2924	4.68502e-08	Dichotomyctere_fluviatilis	Tetraodontidae	Tetraodontiformes	potamodromous	Least Concern	10.2924	10.2924	1.01252	1.01252	1.01252	1.01252	10.7872	0.490327
7.67874	7.67874	4.80449e-08	Dichotomyctere_nigroviridis	Tetraodontidae	Tetraodontiformes	NA	Least Concern	7.67874	7.67874	0.88529	0.88529	0.88529	0.88529	6.09779	0.277172
3.20665	3.24533	0.0386812	Dichotomyctere_ocellatus	Tetraodontidae	Tetraodontiformes	NA	NE/DD	3.20665	3.24533	0.506052	0.511259	0.506052	0.511259	4.79005	0.104132
0.688129	0.711033	0.0229042	Discherodontus_ashmeadi	Cyprinidae	Cypriniformes	NA	Least Concern	0.688129	0.711033	-0.16233	-0.14811	-0.16233	-0.14811	34.0867	0.0589734
2.66941	2.79858	0.129162	Discherodontus_parvus	Cyprinidae	Cypriniformes	NA	NE/DD	2.66941	2.79858	0.426416	0.446937	0.426416	0.446937	17.3298	0.103772
4.21104	4.74012	0.529087	Discherodontus_schroederi	Cyprinidae	Cypriniformes	NA	Least Concern	4.21104	4.74012	0.624389	0.67579	0.624389	0.67579	21.1589	0.729617
26.7171	26.7171	-3.02534e-08	Drepane_punctata	Drepaneidae	Acanthuriformes	amphidromous	Least Concern	26.72	26.72	1.42684	1.42684	1.42684	1.42684	5.44572	0.45381
33.3333	33.3333	2.86228e-08	Drombus_globiceps	Gobiidae	Gobiiformes	amphidromous	Least Concern	33.33	33.33	1.52284	1.52284	1.52283	1.52283	9.47817e-08	9.47817e-08
3.89632	3.89632	1.07241e-09	Eleotris_fusca	Eleotridae	Gobiiformes	amphidromous	Least Concern	3.9	3.9	0.591065	0.591065	0.591065	0.591065	8.28321	0.153393
3.86189	3.86189	3.55925e-08	Eleotris_melanosoma	Eleotridae	Gobiiformes	amphidromous	Least Concern	3.86	3.86	0.586587	0.586587	0.586587	0.586587	13.455	0.236053
29.1101	29.1101	1.79952e-09	Eleotris_oxycephala	Eleotridae	Gobiiformes	amphidromous	Least Concern	29.11	29.11	1.46404	1.46404	1.46404	1.46404	6.18171e-09	0
23.1083	23.1083	1.58458e-09	Eleutheronema_tetradactylum	Polynemidae	Carangiformes	amphidromous	Endangered	23.11	23.11	1.3638	1.3638	1.3638	1.3638	32.1573	1.39814
50.059	50.059	-4.68537e-08	Ellochelon_vaigiensis	Mugilidae	Mugiliformes	catadromous	Least Concern	50.059	50.059	1.69948	1.69948	1.69948	1.69948	-9.3597e-08	0
22.5322	22.5322	-2.34059e-08	Elops_hawaiensis	Elopidae	Elopiformes	anadromous	NE/DD	22.5322	22.5322	1.3528	1.3528	1.3528	1.3528	38.3135	1.41902
24.512	24.512	1.37121e-08	Elops_machnata	Elopidae	Elopiformes	amphidromous	Least Concern	24.51	24.51	1.38934	1.38934	1.38934	1.38934	35.3211	1.5357
26.7171	26.7171	-3.02534e-08	Elops_saurus	Elopidae	Elopiformes	amphidromous	Least Concern	26.72	26.72	1.42684	1.42684	1.42684	1.42684	5.44572	0.45381
0.351563	0.361338	0.00977536	Epalzeorhynchos_frenatum	Cyprinidae	Cypriniformes	NA	Least Concern	0.351563	0.361338	-0.453997	-0.442086	-0.453997	-0.442086	26.7695	0.0282677
0.328744	0.332263	0.00351926	Epalzeorhynchos_munense	Cyprinidae	Cypriniformes	NA	Vulnerable	0.328744	0.332263	-0.483142	-0.478518	-0.483142	-0.478518	32.2937	0.0225672
42.8496	42.8496	3.76624e-08	Epinephelus_areolatus	Epinephelidae	Perciformes	NA	Least Concern	42.8496	42.8496	1.63195	1.63195	1.63195	1.63195	10.4454	1.7409
5.36835	5.36835	2.17773e-08	Esomus_ahli	Danionidae	Cypriniformes	NA	Least Concern	5.36835	5.36835	0.729841	0.729841	0.729841	0.729841	16.7926	0.258348
36.7698	36.7698	-2.17597e-08	Esomus_danrica	Danionidae	Cypriniformes	potamodromous	Least Concern	36.7698	36.7698	1.56549	1.56549	1.56549	1.56549	2.2763	2.2763
0.392527	0.402196	0.00966914	Esomus_longimanus	Danionidae	Cypriniformes	NA	NE/DD	0.392527	0.402196	-0.40613	-0.395562	-0.40613	-0.395562	27.0213	0.030124
0.274521	0.280078	0.00555601	Esomus_metallicus	Danionidae	Cypriniformes	NA	Least Concern	0.274522	0.280078	-0.561423	-0.552721	-0.561423	-0.552721	23.7376	0.0169071
8.31642	8.31642	-3.78595e-08	Eubleekeria_splendens	Leiognathidae	Acanthuriformes	amphidromous	Least Concern	8.32	8.32	0.920123	0.920123	0.920123	0.920123	23.7855	0.485419
33.3333	33.3333	3.33599e-08	Eugnathogobius_kabilia	Gobiidae	Gobiiformes	NA	Least Concern	33.3333	33.3333	1.52288	1.52288	1.52288	1.52288	1.0008e-07	2.00159e-08
0.590772	0.60633	0.0155583	Eugnathogobius_siamensis	Gobiidae	Gobiiformes	NA	Least Concern	0.590772	0.60633	-0.22858	-0.217291	-0.22858	-0.217291	14.9642	0.0405535
3.77101	3.77101	2.9172e-08	Exyrias_puntang	Gobiidae	Gobiiformes	NA	Least Concern	3.77101	3.77101	0.576458	0.576458	0.576458	0.576458	11.083	0.22166
8.58059	8.58059	-1.72162e-09	Fibramia_lateralis	Apogonidae	Kurtiformes	non-migratory	Least Concern	8.58059	8.58059	0.933517	0.933517	0.933517	0.933517	3.89439	0.259626
19.673	19.673	1.97649e-09	Fluvitrygon_oxyrhynchus	Dasyatidae	Myliobatiformes	NA	Endangered	19.673	19.673	1.29387	1.29387	1.29387	1.29387	1.00468e-08	0
0.888274	1.12498	0.23671	Folifer_brevifilis	Cyprinidae	Cypriniformes	NA	NE/DD	0.888274	1.12498	-0.051453	0.0511467	-0.051453	0.051147	50.4863	0.0921282
0.938261	0.942374	0.00411374	Garra_cyrano	Cyprinidae	Cypriniformes	NA	NE/DD	0.938261	0.942374	-0.0276763	-0.0257767	-0.027676	-0.025777	13.1499	0.0543386
3.48593	3.48593	3.13854e-08	Garra_fuliginosa	Cyprinidae	Cypriniformes	NA	Least Concern	3.48593	3.48593	0.542318	0.542318	0.542318	0.542318	32.2939	0.343552
50	50.0327	0.032671	Garra_imberbis	Cyprinidae	Cypriniformes	NA	NE/DD	50	50.0327	1.69897	1.69925	1.69897	1.69925	0.0923222	0.0461611
2.56987	3.01455	0.444684	Garra_mirofrontis	Cyprinidae	Cypriniformes	NA	NE/DD	2.56987	3.01455	0.409911	0.479223	0.409911	0.479223	22.867	0.119099
53.9657	53.9657	1.54474e-08	Garra_nasuta	Cyprinidae	Cypriniformes	NA	Least Concern	53.9657	53.9657	1.73212	1.73212	1.73212	1.73212	21.1579	21.1579
3.87555	5.08448	1.20892	Garra_orientalis	Cyprinidae	Cypriniformes	NA	Least Concern	3.87555	5.08448	0.588334	0.706246	0.588334	0.706246	27.3447	0.385137
7.28231	7.28231	-4.46296e-08	Gazza_minuta	Leiognathidae	Acanthuriformes	NA	Least Concern	7.28231	7.28231	0.862269	0.862269	0.862269	0.862269	25.0051	0.500101
13.9404	13.9404	-4.60247e-09	Gerres_filamentosus	Gerreidae	Acanthuriformes	amphidromous	Least Concern	13.94	13.94	1.14426	1.14426	1.14426	1.14426	36.8153	1.31483
11.564	11.564	5.94021e-09	Gerres_limbatus	Gerreidae	Acanthuriformes	amphidromous	Least Concern	11.56	11.56	1.06296	1.06296	1.06296	1.06296	1.26679	0.0603234
0.688086	0.717269	0.0291835	Glossogobius_aureus	Gobiidae	Gobiiformes	amphidromous	Least Concern	0.69	0.72	-0.161151	-0.142668	-0.161151	-0.142668	26.9218	0.0769193
5.8419	5.8419	8.00022e-09	Glossogobius_giuris	Gobiidae	Gobiiformes	amphidromous	Least Concern	5.84	5.84	0.766413	0.766413	0.766413	0.766413	4.39596	0.338151
50	50	0	Glossogobius_koragensis	Gobiidae	Gobiiformes	NA	Least Concern	50	50	1.69897	1.69897	1.69897	1.69897	0	0
2.56464	2.56464	-3.8808e-08	Glossogobius_sparsipapillus	Gobiidae	Gobiiformes	NA	NE/DD	2.56464	2.56464	0.409026	0.409026	0.409026	0.409026	7.60711	0.105654
10	10	0	Glyptothorax_buchanani	Sisoridae	Siluriformes	NA	NE/DD	10	10	1	1	1	1	54.6145	3.21262
2.95776	3.46972	0.51196	Glyptothorax_deqinensis	Sisoridae	Siluriformes	NA	NE/DD	2.95776	3.46972	0.470963	0.540295	0.470963	0.540295	26.0838	0.28982
5.25244	5.2657	0.0132516	Glyptothorax_filicatus	Sisoridae	Siluriformes	NA	NE/DD	5.25244	5.2657	0.720361	0.721456	0.720361	0.721456	6.09633	0.304816
50	50	0	Glyptothorax_forabilis	Sisoridae	Siluriformes	NA	NE/DD	50	50	1.69897	1.69897	1.69897	1.69897	0	0
1.65	1.72829	0.078292	Glyptothorax_fuscus	Sisoridae	Siluriformes	NA	Least Concern	1.65	1.72829	0.217484	0.237617	0.217484	0.237617	13.6976	0.0883715
3.54378	4.05603	0.512251	Glyptothorax_housei	Sisoridae	Siluriformes	NA	Endangered	3.54378	4.05603	0.549467	0.608101	0.549467	0.608101	18.5937	0.715142
0.835538	0.878999	0.0434607	Glyptothorax_indicus	Sisoridae	Siluriformes	NA	Least Concern	0.835538	0.878999	-0.0780338	-0.0560116	-0.078034	-0.056012	22.4702	0.0729552
3.24424	4.11347	0.86923	Glyptothorax_irroratus	Sisoridae	Siluriformes	NA	NE/DD	3.24424	4.11347	0.511113	0.614208	0.511113	0.614208	29.7804	0.744509
0.325704	0.339438	0.0137334	Glyptothorax_lampris	Sisoridae	Siluriformes	NA	Least Concern	0.325704	0.339438	-0.487177	-0.46924	-0.487177	-0.46924	24.3379	0.0274384
0.146912	0.155561	0.00864897	Glyptothorax_laosensis	Sisoridae	Siluriformes	NA	Least Concern	0.146912	0.155561	-0.832943	-0.808099	-0.832943	-0.808099	32.0609	0.0108902
25	32.1796	7.17964	Glyptothorax_longicauda	Sisoridae	Siluriformes	NA	NE/DD	25	32.1796	1.39794	1.50758	1.39794	1.50758	38.914	0.67093
4.55805	6.08028	1.52223	Glyptothorax_longinema	Sisoridae	Siluriformes	NA	NE/DD	4.55805	6.08028	0.658779	0.783923	0.658779	0.783923	35.079	0.381293
1.40131	1.7587	0.357392	Glyptothorax_macromaculatus	Sisoridae	Siluriformes	NA	Least Concern	1.40131	1.7587	0.146533	0.245191	0.146533	0.245191	27.9767	0.0992083
8.52904	8.8234	0.294358	Glyptothorax_platypogonides	Sisoridae	Siluriformes	NA	Least Concern	8.52904	8.8234	0.9309	0.945636	0.9309	0.945636	10.7238	0.255328
33.4759	33.4759	-3.34166e-09	Glyptothorax_porrectus	Sisoridae	Siluriformes	NA	NE/DD	33.4759	33.4759	1.52473	1.52473	1.52473	1.52473	0.00743657	0.000743657
8.33333	14.5783	6.24498	Glyptothorax_sinensis	Sisoridae	Siluriformes	NA	NE/DD	8.33333	14.5783	0.920819	1.16371	0.920819	1.16371	52.2128	0.538276
0.362208	0.406524	0.044316	Glyptothorax_trilineatus	Sisoridae	Siluriformes	NA	Least Concern	0.362208	0.406524	-0.441042	-0.390914	-0.441042	-0.390914	60.3313	0.031276
1.50428	1.82669	0.322406	Glyptothorax_zanaensis	Sisoridae	Siluriformes	NA	NE/DD	1.50428	1.82669	0.177329	0.261664	0.177329	0.261664	24.1089	0.0956703
8.3419	11.7901	3.4482	Gobiobotia_yuanjiangensis	Gobionidae	Cypriniformes	NA	NE/DD	8.3419	11.7901	0.921265	1.07152	0.921265	1.07152	34.7228	2.17017
33.3333	33.3333	2.86228e-08	Gobiopsis_macrostomus	Gobiidae	Gobiiformes	amphidromous	Least Concern	33.33	33.33	1.52284	1.52284	1.52283	1.52283	9.47817e-08	9.47817e-08
33.3333	33.3333	-3.43818e-08	Gobiopterus_brachypterus	Gobiidae	Gobiiformes	NA	NE/DD	33.3333	33.3333	1.52288	1.52288	1.52288	1.52288	-1.03145e-07	0
0.958161	0.958161	-1.63673e-08	Gobiopterus_chuno	Gobiidae	Gobiiformes	amphidromous	NE/DD	0.96	0.96	-0.0177288	-0.0177288	-0.017729	-0.017729	7.31724	0.0413403
20	20.2237	0.22374	Gymnodanio_strigatus	Xenocyprididae	Cypriniformes	NA	NE/DD	20	20.2237	1.30103	1.30586	1.30103	1.30586	24.8726	2.76362
1.03484	1.08732	0.0524865	Gyrinocheilus_aymonieri	Gyrinocheilidae	Cypriniformes	potamodromous	Least Concern	1.03484	1.08733	0.0148724	0.0363594	0.014872	0.036359	26.3225	0.0904553
1.21226	1.25363	0.0413619	Gyrinocheilus_pennocki	Gyrinocheilidae	Cypriniformes	potamodromous	Least Concern	1.21226	1.25363	0.0835976	0.0981683	0.083598	0.098168	32.0452	0.108628
16.8958	16.8958	-1.62594e-08	Halophryne_diemensis	Batrachoididae	Batrachoidiformes	NA	NE/DD	16.8958	16.8958	1.22778	1.22778	1.22778	1.22778	0.605985	0.0504988
0.593313	0.623917	0.0306042	Hampala_dispar	Cyprinidae	Cypriniformes	potamodromous	Least Concern	0.593313	0.623917	-0.226716	-0.204873	-0.226716	-0.204873	47.2847	0.0426758
0.522809	0.581335	0.0585264	Hampala_macrolepidota	Cyprinidae	Cypriniformes	potamodromous	Least Concern	0.522809	0.581335	-0.281657	-0.235574	-0.281657	-0.235574	71.5854	0.0358106
49.237	49.237	1.20135e-08	Haplochromis_niloticus	Cichlidae	Cichliformes	NA	NE/DD	49.237	49.237	1.69229	1.69229	1.69229	1.69229	2.43991e-08	0
33.8459	33.8459	-2.8056e-09	Harpadon_nehereus	Synodontidae	Aulopiformes	NA	Near Threatened	33.8459	33.8459	1.52951	1.52951	1.52951	1.52951	-8.28933e-09	0
1.61274	1.79576	0.183021	Helicophagus_leptorhynchus	Pangasiidae	Siluriformes	NA	NE/DD	1.61274	1.79576	0.207564	0.254248	0.207564	0.254248	50.6654	0.115411
7.23942	7.53579	0.296369	Helicophagus_waandersii	Pangasiidae	Siluriformes	potamodromous	Least Concern	7.23942	7.53579	0.859704	0.877129	0.859704	0.877129	15.7888	0.303631
0.25548	0.27458	0.0190995	Helostoma_temminckii	Helostomatidae	Anabantiformes	potamodromous	Least Concern	0.25548	0.27458	-0.592643	-0.561331	-0.592643	-0.561331	54.7735	0.0235991
6.1364	6.1364	1.33523e-08	Hemiarius_stormii	Ariidae	Siluriformes	NA	Least Concern	6.1364	6.1364	0.787914	0.787914	0.787914	0.787914	7.21631	0.328014
18.5083	18.5083	2.11392e-08	Hemiarius_verrucosus	Ariidae	Siluriformes	NA	NE/DD	18.5083	18.5083	1.26737	1.26737	1.26737	1.26737	1.14215e-07	0
2.13235	2.30587	0.173517	Hemibagrus_filamentus	Bagridae	Siluriformes	NA	NE/DD	2.13235	2.30587	0.328859	0.362835	0.328859	0.362835	46.9193	0.20853
28.764	32.1913	3.42733	Hemibagrus_guttatus	Bagridae	Siluriformes	NA	NE/DD	28.764	32.1913	1.45885	1.50774	1.45885	1.50774	13.041	6.5205
20.9884	20.9884	2.88097e-08	Hemibagrus_microphthalmus	Bagridae	Siluriformes	potamodromous	Least Concern	20.9884	20.9884	1.32198	1.32198	1.32198	1.32198	3.39963	3.39963
1.68019	1.88591	0.205723	Hemibagrus_nemurus	Bagridae	Siluriformes	potamodromous	Least Concern	1.68019	1.88591	0.225359	0.275522	0.225359	0.275522	49.0701	0.117674
1.08483	1.20448	0.119645	Hemibagrus_pluriradiatus	Bagridae	Siluriformes	NA	Least Concern	1.08483	1.20447	0.0353617	0.0807978	0.035362	0.080798	35.9923	0.117239
3.26144	3.5143	0.252861	Hemibagrus_spilopterus	Bagridae	Siluriformes	NA	Least Concern	3.26144	3.5143	0.51341	0.545839	0.51341	0.545839	29.3323	0.1767
0.509686	0.561859	0.0521735	Hemibagrus_wyckii	Bagridae	Siluriformes	potamodromous	Least Concern	0.509686	0.561859	-0.292697	-0.250373	-0.292697	-0.250373	73.1659	0.0358832
0.646258	0.763694	0.117436	Hemibagrus_wyckioides	Bagridae	Siluriformes	potamodromous	Least Concern	0.646258	0.763694	-0.189594	-0.117081	-0.189594	-0.117081	68.271	0.0482481
4.2828	7.14486	2.86206	Hemibarbus_maculatus	Gobionidae	Cypriniformes	NA	Least Concern	4.2828	7.14486	0.631728	0.853994	0.631728	0.853994	49.3725	0.31649
20	20.0735	0.0734573	Hemibarbus_medius	Gobionidae	Cypriniformes	NA	NE/DD	20	20.0735	1.30103	1.30262	1.30103	1.30262	0.366003	0.00989197
1.46625	1.71899	0.252742	Hemiculterella_macrolepis	Xenocyprididae	Cypriniformes	NA	NE/DD	1.46625	1.71899	0.166208	0.235273	0.166208	0.235273	32.5948	0.179093
33.3335	33.3335	6.48478e-09	Hemigobius_hoevenii	Gobiidae	Gobiiformes	amphidromous	Least Concern	33.33	33.33	1.52284	1.52284	1.52283	1.52283	1.94543e-08	0
3.16162	3.44563	0.284012	Hemimyzon_confluens	Balitoridae	Cypriniformes	NA	Vulnerable	3.16162	3.44563	0.499909	0.537269	0.499909	0.537269	12.8291	0.18593
4.59767	5.59259	0.994922	Hemimyzon_ecdyonuroides	Balitoridae	Cypriniformes	NA	NE/DD	4.59767	5.59259	0.662538	0.747613	0.662538	0.747613	28.2761	0.479256
2.24743	2.5993	0.351867	Hemimyzon_elongatus	Balitoridae	Cypriniformes	NA	NE/DD	2.24743	2.5993	0.351687	0.414857	0.351687	0.414857	19.326	0.217147
9.76174	9.76174	-4.01488e-08	Hemimyzon_khonensis	Balitoridae	Cypriniformes	NA	NE/DD	9.76174	9.76174	0.989527	0.989527	0.989527	0.989527	-4.11287e-07	0
0.46548	0.489037	0.0235568	Hemimyzon_papilio	Balitoridae	Cypriniformes	NA	Least Concern	0.46548	0.489037	-0.332099	-0.310658	-0.332099	-0.310658	12.5066	0.0287509
1.13946	1.204	0.0645329	Hemimyzon_pengi	Balitoridae	Cypriniformes	NA	NE/DD	1.13946	1.204	0.0567006	0.0806254	0.056701	0.080625	12.0242	0.0546556
3.21223	3.4662	0.25397	Hemimyzon_tchangi	Balitoridae	Cypriniformes	NA	NE/DD	3.21223	3.4662	0.506807	0.539854	0.506807	0.539854	7.86434	0.0721499
28.2136	28.2136	2.9071e-08	Hemiramphus_far	Hemiramphidae	Beloniformes	non-migratory	NE/DD	28.2136	28.2136	1.45046	1.45046	1.45046	1.45046	44.0908	4.89897
13.2922	15.1284	1.83626	Hemisilurus_heterorhynchus	Siluridae	Siluriformes	NA	Least Concern	13.2922	15.1284	1.1236	1.17979	1.1236	1.17979	30.3827	0.607655
1.41108	1.64295	0.231869	Hemisilurus_mekongensis	Siluridae	Siluriformes	potamodromous	Least Concern	1.41108	1.64295	0.149552	0.215625	0.149552	0.215625	59.0736	0.112951
4.50242	4.64229	0.139863	Hemitrygon_laosensis	Dasyatidae	Myliobatiformes	potamodromous	Endangered	4.50242	4.64229	0.653446	0.666732	0.653446	0.666732	7.14347	0.310586
0.355073	0.377499	0.0224262	Henicorhynchus_caudimaculatus	Cyprinidae	Cypriniformes	potamodromous	Least Concern	0.355073	0.377499	-0.449682	-0.423084	-0.449682	-0.423084	38.8571	0.0305001
0.592383	0.600439	0.00805617	Henicorhynchus_entmema	Cyprinidae	Cypriniformes	potamodromous	Least Concern	0.592383	0.600439	-0.227397	-0.221531	-0.227397	-0.221531	28.024	0.0562731
0.413784	0.451217	0.037433	Henicorhynchus_ornatipinnis	Cyprinidae	Cypriniformes	NA	Least Concern	0.413784	0.451217	-0.383226	-0.345615	-0.383226	-0.345615	51.2085	0.0445291
0.476546	0.511235	0.034689	Henicorhynchus_siamensis	Cyprinidae	Cypriniformes	potamodromous	Least Concern	0.476546	0.511235	-0.321895	-0.291379	-0.321895	-0.291379	44.5696	0.0465722
0.259158	0.280259	0.021101	Heteropneustes_fossilis	Heteropneustidae	Siluriformes	NA	Least Concern	0.259158	0.280259	-0.586435	-0.55244	-0.586435	-0.55244	48.2198	0.0231715
19.2613	19.2613	-3.39702e-08	Heteropneustes_kemratensis	Heteropneustidae	Siluriformes	NA	Least Concern	19.2613	19.2613	1.28469	1.28469	1.28469	1.28469	11.124	2.2248
36.2103	36.2103	-2.391e-08	Hexanematichthys_sagor	Ariidae	Siluriformes	amphidromous	NE/DD	36.21	36.21	1.55883	1.55883	1.55883	1.55883	3.18654	0.53109
50.0294	50.0294	-3.05909e-08	Hilsa_kelee	Dorosomatidae	Clupeiformes	anadromous	Least Concern	50.0294	50.0294	1.69923	1.69923	1.69922	1.69922	0.0243506	0.0243506
51.9676	51.9676	1.50069e-08	Himantura_undulata	Dasyatidae	Myliobatiformes	NA	Endangered	51.9676	51.9676	1.71573	1.71573	1.71573	1.71573	16.9793	16.9793
3.62499	3.82037	0.195382	Hippichthys_heptagonus	Syngnathidae	Syngnathiformes	NA	Least Concern	3.62499	3.82037	0.559307	0.582106	0.559307	0.582106	15.8719	0.330665
11.1861	11.1861	-2.42903e-08	Hippichthys_penicillus	Syngnathidae	Syngnathiformes	NA	Least Concern	11.1861	11.1861	1.04868	1.04868	1.04868	1.04868	1.58968	0.0935103
9.09091	9.09091	-9.09091e-09	Hippichthys_spicifer	Syngnathidae	Syngnathiformes	amphidromous	Least Concern	9.09	9.09	0.958564	0.958564	0.958564	0.958564	7.62105	0.177234
0.656909	0.658931	0.00202224	Homaloptera_confuzona	Balitoridae	Cypriniformes	NA	NE/DD	0.656909	0.658931	-0.182495	-0.18116	-0.182495	-0.18116	12.2736	0.0505084
23.1451	24.1219	0.976775	Homaloptera_orthogoniata	Balitoridae	Cypriniformes	NA	Least Concern	23.1451	24.1219	1.36446	1.38241	1.36446	1.38241	4.04933	4.04933
32.6184	32.6184	-4.04111e-08	Homalopteroides_lineatus	Balitoridae	Cypriniformes	NA	NE/DD	32.6184	32.6184	1.51346	1.51346	1.51346	1.51346	11.2989	2.82472
0.163069	0.167469	0.00440014	Homalopteroides_smithi	Balitoridae	Cypriniformes	NA	Least Concern	0.163069	0.167469	-0.787629	-0.776066	-0.787629	-0.776066	24.5224	0.0107319
0.499918	0.500614	0.000695705	Homalopteroides_tweediei	Balitoridae	Cypriniformes	NA	Least Concern	0.499918	0.500614	-0.301101	-0.300497	-0.301101	-0.300497	7.99856	0.0278696
4.26244	5.95534	1.6929	Homatula_anguillioides	Nemacheilidae	Cypriniformes	NA	NE/DD	4.26244	5.95534	0.629658	0.774907	0.629658	0.774907	30.785	0.34983
33.3333	33.3391	0.0057447	Homatula_longibarbata	Nemacheilidae	Cypriniformes	NA	NE/DD	33.3333	33.3391	1.52288	1.52295	1.52288	1.52295	0.0412865	0.00317588
4.49418	5.70201	1.20783	Homatula_pycnolepis	Nemacheilidae	Cypriniformes	NA	NE/DD	4.49418	5.70201	0.65265	0.756028	0.65265	0.756028	24.0303	0.151134
10	11.0666	1.06659	Homatula_variegata	Nemacheilidae	Cypriniformes	NA	NE/DD	10	11.0666	1	1.04401	1	1.04401	16.19	0.131626
17.2109	31.6714	14.4605	Homatula_wuliangensis	Nemacheilidae	Cypriniformes	NA	NE/DD	17.2109	31.6714	1.2358	1.50067	1.2358	1.50067	49.9881	9.99761
5.83339	5.83339	1.13286e-08	Hyporhamphus_limbatus	Hemiramphidae	Beloniformes	potamodromous	Least Concern	5.83339	5.83339	0.765921	0.765921	0.765921	0.765921	7.75828	0.235099
2.9073	2.9386	0.0312904	Hyporhamphus_quoyi	Hemiramphidae	Beloniformes	NA	Least Concern	2.90731	2.93859	0.463491	0.46814	0.463491	0.46814	17.9681	0.219123
3.69838	4.17899	0.480611	Hypsibarbus_lagleri	Cyprinidae	Cypriniformes	potamodromous	Vulnerable	3.69838	4.17899	0.568011	0.621071	0.568011	0.621071	38.6135	0.482669
1.8316	2.08266	0.251059	Hypsibarbus_malcolmi	Cyprinidae	Cypriniformes	potamodromous	Least Concern	1.8316	2.08266	0.262831	0.318619	0.262831	0.318619	49.3951	0.11514
0.792904	0.84237	0.0494661	Hypsibarbus_pierrei	Cyprinidae	Cypriniformes	potamodromous	NE/DD	0.792904	0.84237	-0.100779	-0.0744971	-0.100779	-0.074497	53.919	0.0749917
8.24929	8.24929	-4.24147e-08	Hypsibarbus_suvattii	Cyprinidae	Cypriniformes	NA	NE/DD	8.24929	8.24929	0.916417	0.916417	0.916417	0.916417	3.62152	3.62152
0.664455	0.709457	0.0450011	Hypsibarbus_vernayi	Cyprinidae	Cypriniformes	NA	Least Concern	0.664456	0.709457	-0.177534	-0.149074	-0.177534	-0.149074	43.8028	0.0577112
2.63065	2.96832	0.337676	Hypsibarbus_wetmorei	Cyprinidae	Cypriniformes	potamodromous	Least Concern	2.63065	2.96832	0.420063	0.472511	0.420063	0.472511	43.229	0.270181
33.621	33.621	1.84664e-09	Ichthyocampus_carce	Syngnathidae	Syngnathiformes	amphidromous	Least Concern	33.62	33.62	1.5266	1.5266	1.5266	1.5266	5.49238e-09	0
13.2606	13.2606	-4.16954e-09	Ilisha_megaloptera	Pristigasteridae	Clupeiformes	anadromous	Least Concern	13.2606	13.2606	1.12256	1.12256	1.12256	1.12256	43.8797	4.87552
1.94116	2.19047	0.249318	Incisilabeo_behri	Cyprinidae	Cypriniformes	potamodromous	Vulnerable	1.94115	2.19047	0.28806	0.340538	0.28806	0.340538	48.0722	0.150697
27.2832	27.2832	-3.39592e-08	Indostomus_paradoxus	Indostomidae	Synbranchiformes	NA	Least Concern	27.2832	27.2832	1.4359	1.4359	1.43589	1.43589	-1.24469e-07	0
2.50827	2.50827	-1.96903e-08	Indostomus_spinosus	Indostomidae	Synbranchiformes	NA	Near Threatened	2.50827	2.50827	0.399374	0.399374	0.399374	0.399374	4.73341	0.0353239
14.6821	14.6821	-3.80722e-08	Johnius_belangerii	Sciaenidae	Acanthuriformes	amphidromous	Least Concern	14.68	14.68	1.16673	1.16673	1.16673	1.16673	6.4762	0.809525
25	25	1.8717e-08	Johnius_borneensis	Sciaenidae	Acanthuriformes	NA	Least Concern	25	25	1.39794	1.39794	1.39794	1.39794	0.00151766	0.000116743
36.2103	36.2103	-2.391e-08	Johnius_coitor	Sciaenidae	Acanthuriformes	amphidromous	Least Concern	36.21	36.21	1.55883	1.55883	1.55883	1.55883	3.18654	0.53109
8.86956	8.86956	-1.19036e-08	Johnius_trachycephalus	Sciaenidae	Acanthuriformes	NA	Least Concern	8.86956	8.86956	0.947902	0.947902	0.947902	0.947902	7.63385	0.246253
50.0003	50.0003	1.45908e-08	Johnius_weberi	Sciaenidae	Acanthuriformes	NA	Least Concern	50.0003	50.0003	1.69897	1.69897	1.69897	1.69897	2.91814e-08	0
0.293901	0.298398	0.00449712	Kryptopterus_bicirrhis	Siluridae	Siluriformes	NA	Least Concern	0.293901	0.298398	-0.531799	-0.525204	-0.531799	-0.525204	42.8546	0.0232779
1.73207	1.75248	0.0204042	Kryptopterus_cryptopterus	Siluridae	Siluriformes	potamodromous	Least Concern	1.73207	1.75248	0.238566	0.243652	0.238566	0.243652	22.4901	0.214192
3.8938	3.8938	2.9288e-08	Kryptopterus_dissitus	Siluridae	Siluriformes	NA	NE/DD	3.8938	3.8938	0.590374	0.590374	0.590374	0.590374	14.9753	0.880898
0.310976	0.319514	0.00853831	Kryptopterus_geminus	Siluridae	Siluriformes	NA	Least Concern	0.310976	0.319514	-0.507273	-0.49551	-0.507273	-0.49551	44.3523	0.024764
10.4363	10.4363	2.32848e-08	Kryptopterus_limpok	Siluridae	Siluriformes	NA	Least Concern	10.4363	10.4363	1.01855	1.01855	1.01855	1.01855	0.773758	0.110537
23.0321	23.0321	4.77092e-08	Kryptopterus_palembangensis	Siluridae	Siluriformes	NA	Least Concern	23.0321	23.0321	1.36233	1.36233	1.36233	1.36233	31.0064	10.3355
4.21578	4.21578	2.27436e-08	Kryptopterus_paraschilbeides	Siluridae	Siluriformes	NA	NE/DD	4.21579	4.21579	0.624878	0.624878	0.624878	0.624878	2.89246	0.192831
31.7213	31.7213	-8.83252e-09	Labeo_calbasu	Cyprinidae	Cypriniformes	potamodromous	Least Concern	31.7213	31.7213	1.50135	1.50135	1.50135	1.50135	49.8075	16.6025
0.560877	0.650273	0.0893961	Labeo_chrysophekadion	Cyprinidae	Cypriniformes	potamodromous	Least Concern	0.560877	0.650273	-0.251132	-0.186904	-0.251132	-0.186904	67.3596	0.0424446
8.68169	8.68169	3.19611e-08	Labeo_dyocheilus	Cyprinidae	Cypriniformes	potamodromous	Least Concern	8.68169	8.68169	0.938604	0.938604	0.938604	0.938604	11.9556	1.49445
15.1818	16.0319	0.850116	Labeo_erythropterus	Cyprinidae	Cypriniformes	potamodromous	Least Concern	15.1818	16.0319	1.18132	1.20498	1.18132	1.20498	8.02836	0.66903
7.0245	7.0245	3.66607e-08	Labeo_indramontri	Cyprinidae	Cypriniformes	NA	NE/DD	7.02451	7.02451	0.846616	0.846616	0.846616	0.846616	17.4396	0.317083
60.7987	60.7987	1.65731e-08	Labeo_pangusia	Cyprinidae	Cypriniformes	potamodromous	Near Threatened	60.7987	60.7987	1.78389	1.78389	1.78389	1.78389	6.52647	6.52647
1.92508	2.44216	0.517075	Labeo_pierrei	Cyprinidae	Cypriniformes	NA	Vulnerable	1.92508	2.44216	0.28445	0.387774	0.28445	0.387774	42.4018	0.189294
0.310262	0.326537	0.0162754	Labiobarbus_leptocheilus	Cyprinidae	Cypriniformes	potamodromous	Least Concern	0.310262	0.326537	-0.508271	-0.486068	-0.508271	-0.486068	53.8366	0.0267179
0.882666	0.925381	0.0427151	Labiobarbus_lineatus	Cyprinidae	Cypriniformes	NA	NE/DD	0.882666	0.925381	-0.0542036	-0.0336794	-0.054204	-0.033679	26.2613	0.0831055
0.606958	0.625925	0.0189666	Labiobarbus_siamensis	Cyprinidae	Cypriniformes	NA	Least Concern	0.606958	0.625925	-0.216841	-0.203478	-0.216841	-0.203478	25.498	0.0461086
50.1578	50.1578	1.57838e-08	Lagocephalus_sceleratus	Tetraodontidae	Tetraodontiformes	NA	Least Concern	50.1578	50.1578	1.70034	1.70034	1.70034	1.70034	6.36902	0.707669
5.51977	5.96916	0.449398	Laides_hexanema	Ailiidae	Siluriformes	potamodromous	Least Concern	5.51977	5.96917	0.741921	0.775914	0.741921	0.775914	18.5311	1.54426
0.284895	0.308465	0.0235695	Laides_longibarbis	Ailiidae	Siluriformes	NA	Least Concern	0.284895	0.308465	-0.545315	-0.510794	-0.545315	-0.510794	54.7432	0.0254738
3.97734	4.11271	0.13537	Laocypris_hispida	Cyprinidae	Cypriniformes	NA	NE/DD	3.97734	4.11271	0.599593	0.614128	0.599593	0.614128	8.44231	0.183528
44.4652	44.4652	4.4772e-08	Lates_calcarifer	Latidae	Carangiformes	catadromous	Least Concern	44.4652	44.4652	1.64802	1.64802	1.64802	1.64802	11.496	1.91601
0.248249	0.251371	0.00312251	Laubuka_caeruleostigmata	Danionidae	Cypriniformes	NA	Endangered	0.248249	0.251371	-0.605112	-0.599685	-0.605112	-0.599685	25.8086	0.01454
2.53184	2.59598	0.0641443	Laubuka_laubuca	Danionidae	Cypriniformes	NA	Least Concern	2.53184	2.59598	0.403436	0.414302	0.403436	0.414302	6.83848	0.273539
50	50	-3.13035e-08	Leiodon_cutcutia	Tetraodontidae	Tetraodontiformes	potamodromous	Least Concern	50	50	1.69897	1.69897	1.69897	1.69897	6.52991e-05	1.08832e-05
5.9779	5.9779	-1.02942e-08	Leiognathus_equula	Leiognathidae	Acanthuriformes	amphidromous	Least Concern	5.98	5.98	0.776701	0.776701	0.776701	0.776701	17.0734	0.363265
0.553185	0.574817	0.0216325	Lepidocephalichthys_berdmorei	Cobitidae	Cypriniformes	NA	Least Concern	0.553185	0.574817	-0.25713	-0.24047	-0.25713	-0.24047	15.6578	0.0295988
0.196472	0.19903	0.00255877	Lepidocephalichthys_furcatus	Cobitidae	Cypriniformes	NA	Least Concern	0.196472	0.19903	-0.706699	-0.701081	-0.706699	-0.701081	17.9502	0.00922888
0.136756	0.14138	0.00462375	Lepidocephalichthys_hasselti	Cobitidae	Cypriniformes	NA	Least Concern	0.136756	0.14138	-0.864054	-0.849612	-0.864054	-0.849612	23.6769	0.00877898
5.1186	5.1186	4.80346e-08	Lepidocephalichthys_kranos	Cobitidae	Cypriniformes	NA	NE/DD	5.1186	5.1186	0.709151	0.709151	0.709151	0.709151	17.8324	0.356648
25	25	0	Lepidocephalichthys_micropogon	Cobitidae	Cypriniformes	NA	Least Concern	25	25	1.39794	1.39794	1.39794	1.39794	4.87445	0.304653
5.13083	5.13083	-4.16667e-08	Lepidocephalichthys_zeppelini	Cobitidae	Cypriniformes	NA	NE/DD	5.13083	5.13083	0.710187	0.710187	0.710187	0.710187	12.5449	0.129329
3.81732	3.81732	-8.1833e-09	Lepidocephalus_macrochir	Cobitidae	Cypriniformes	NA	Least Concern	3.81732	3.81732	0.581759	0.581759	0.581759	0.581759	38.0029	0.408633
5.1938	5.1938	-3.59247e-08	Leptobarbus_hoevenii	Leptobarbidae	Cypriniformes	potamodromous	Least Concern	5.1938	5.1938	0.715485	0.715485	0.715485	0.715485	27.3601	0.35077
3.80597	3.9876	0.181631	Leptobarbus_rubripinna	Leptobarbidae	Cypriniformes	NA	NE/DD	3.80597	3.9876	0.580465	0.600711	0.580465	0.600711	43.7687	0.270177
42.8496	42.8496	3.76624e-08	Lepturacanthus_savala	Leptobarbidae	Cypriniformes	NA	NE/DD	42.8496	42.8496	1.63195	1.63195	1.63195	1.63195	10.4454	1.7409
50.8805	50.8805	-5.98892e-09	Lobocheilos_bo	Cyprinidae	Cypriniformes	NA	Least Concern	50.8805	50.8805	1.70655	1.70655	1.70655	1.70655	-1.17705e-08	0
70.6498	70.6498	9.23957e-09	Lobocheilos_falcifer	Cyprinidae	Cypriniformes	NA	Vulnerable	70.6498	70.6498	1.84911	1.84911	1.84911	1.84911	1.3078e-08	0
0.620122	0.666525	0.0464031	Lobocheilos_rhabdoura	Cyprinidae	Cypriniformes	NA	Least Concern	0.620122	0.666525	-0.207523	-0.176184	-0.207523	-0.176184	40.9839	0.0546452
17.5955	17.5955	4.03046e-08	Lobotes_surinamensis	Lobotidae	Acanthuriformes	NA	Least Concern	17.5955	17.5955	1.2454	1.2454	1.2454	1.2454	34.4998	1.56817
7.44307	7.44307	-1.4885e-08	Longiculter_siahi	Xenocyprididae	Cypriniformes	NA	NE/DD	7.44307	7.44307	0.871752	0.871752	0.871752	0.871752	11.9182	0.384457
2.76855	3.90727	1.13873	Luciocyprinus_striolatus	Cyprinidae	Cypriniformes	NA	Endangered	2.76855	3.90727	0.442252	0.591874	0.442252	0.591874	60.2625	0.236324
1.00079	1.05067	0.0498785	Luciosoma_bleekeri	Danionidae	Cypriniformes	NA	Least Concern	1.00079	1.05067	0.000343825	0.0214663	0.000344	0.021466	37.9091	0.0844302
1.82988	1.8631	0.0332196	Luciosoma_setigerum	Danionidae	Cypriniformes	NA	Least Concern	1.82988	1.86309	0.262422	0.270235	0.262422	0.270235	21.5471	0.150679
32.3026	32.3026	1.76619e-08	Lutjanus_argentimaculatus	Lutjanidae	Acanthuriformes	NA	Least Concern	32.3026	32.3026	1.50924	1.50924	1.50924	1.50924	21.0472	2.10472
17.5955	17.5955	4.03046e-08	Lutjanus_russellii	Lutjanidae	Acanthuriformes	NA	Least Concern	17.5955	17.5955	1.2454	1.2454	1.2454	1.2454	34.4998	1.56817
3.27804	3.33494	0.0569024	Lycothrissa_crocodilus	Engraulidae	Clupeiformes	potamodromous	Least Concern	3.27804	3.33494	0.515614	0.523088	0.515614	0.523088	16.1861	0.163495
0.327813	0.408878	0.0810649	Macrochirichthys_macrochirus	Xenocyprididae	Cypriniformes	NA	Least Concern	0.327813	0.408878	-0.484374	-0.388406	-0.484374	-0.388406	73.7863	0.0256737
0.862078	0.911869	0.0497916	Macrognathus_aculeatus	Mastacembelidae	Synbranchiformes	potamodromous	Least Concern	0.862078	0.911869	-0.0644534	-0.0400675	-0.064453	-0.040068	28.0545	0.0834956
0.327932	0.342146	0.0142134	Macrognathus_circumcinctus	Mastacembelidae	Synbranchiformes	NA	Least Concern	0.327932	0.342146	-0.484216	-0.465789	-0.484216	-0.465789	35.619	0.0320603
0.935758	0.939095	0.00333681	Macrognathus_maculatus	Mastacembelidae	Synbranchiformes	NA	Least Concern	0.935758	0.939095	-0.0288365	-0.0272905	-0.028836	-0.02729	20.8617	0.071937
36.7698	36.7698	-2.17597e-08	Macrognathus_meklongensis	Mastacembelidae	Synbranchiformes	NA	NE/DD	36.7698	36.7698	1.56549	1.56549	1.56549	1.56549	2.2763	2.2763
0.587606	0.596674	0.00906803	Macrognathus_semiocellatus	Mastacembelidae	Synbranchiformes	NA	Least Concern	0.587606	0.596674	-0.230914	-0.224263	-0.230914	-0.224263	34.3952	0.053079
0.836432	0.883128	0.0466958	Macrognathus_siamensis	Mastacembelidae	Synbranchiformes	NA	Least Concern	0.836432	0.883128	-0.0775694	-0.0539763	-0.077569	-0.053976	40.2131	0.0685061
4.5189	4.81199	0.293087	Macropodus_opercularis	Osphronemidae	Anabantiformes	NA	Least Concern	4.5189	4.81199	0.655033	0.682324	0.655033	0.682324	15.5005	0.176143
50	50	0	Macrotrema_caligans	Synbranchidae	Synbranchiformes	NA	NE/DD	50	50	1.69897	1.69897	1.69897	1.69897	4.10305	0.455894
42.8496	42.8496	3.76624e-08	Maculabatis_gerrardi	Dasyatidae	Myliobatiformes	NA	Endangered	42.8496	42.8496	1.63195	1.63195	1.63195	1.63195	10.4454	1.7409
1.26726	1.52933	0.262064	Mastacembelus_armatus	Mastacembelidae	Synbranchiformes	potamodromous	Least Concern	1.26727	1.52933	0.102867	0.184501	0.102867	0.184501	50.2249	0.104201
4.9298	4.93644	0.00664084	Mastacembelus_erythrotaenia	Mastacembelidae	Synbranchiformes	NA	Least Concern	4.9298	4.93644	0.692829	0.693414	0.692829	0.693414	38.7137	0.302451
0.787345	0.892686	0.10534	Mastacembelus_favus	Mastacembelidae	Synbranchiformes	NA	Least Concern	0.787345	0.892686	-0.103835	-0.0493013	-0.103835	-0.049301	64.491	0.06142
33.3333	33.3333	3.33333e-08	Mastacembelus_unicolor	Mastacembelidae	Synbranchiformes	potamodromous	Least Concern	33.3333	33.3333	1.52288	1.52288	1.52288	1.52288	42.7006	4.74451
9.47003	9.47003	-2.03601e-09	Megalops_cyprinoides	Megalopidae	Elopiformes	amphidromous	Least Concern	9.47	9.47	0.97635	0.97635	0.97635	0.97635	21.2345	0.624545
7.14286	12.4456	5.30276	Mekongina_bibarba	Cyprinidae	Cypriniformes	NA	NE/DD	7.14286	12.4456	0.853872	1.09502	0.853872	1.09502	62.6515	0.978929
2.36335	2.71506	0.351711	Mekongina_erythrospila	Cyprinidae	Cypriniformes	potamodromous	Near Threatened	2.36335	2.71507	0.373529	0.43378	0.373529	0.43378	43.2158	0.238761
17.2129	17.7005	0.487547	Mekongina_lancangensis	Cyprinidae	Cypriniformes	NA	NE/DD	17.2129	17.7005	1.23586	1.24799	1.23585	1.24798	9.24641	0.660458
17.9864	24.2839	6.29756	Metzia_bounthobi	Xenocyprididae	Cypriniformes	NA	NE/DD	17.9864	24.2839	1.25494	1.38532	1.25494	1.38532	25.933	8.64433
25	25	0	Metzia_lineata	Xenocyprididae	Cypriniformes	NA	Least Concern	25	25	1.39794	1.39794	1.39794	1.39794	30.5169	3.39077
20.0186	20.0228	0.00419818	Microcobitis_misgurnoides	Cobitidae	Cypriniformes	NA	NE/DD	20.0186	20.0228	1.30143	1.30153	1.30143	1.30153	0.121529	0.0121529
1.54715	1.59172	0.0445783	Micronema_cheveyi	Siluridae	Siluriformes	potamodromous	NE/DD	1.54715	1.59172	0.189531	0.201868	0.189531	0.201868	8.77039	0.0812073
0.576608	0.57762	0.0010114	Microphis_boaja	Syngnathidae	Syngnathiformes	NA	NE/DD	0.576609	0.57762	-0.239119	-0.238358	-0.239119	-0.238358	20.4623	0.0334898
1.73121	1.73185	0.000645946	Microphis_brachyurus	Syngnathidae	Syngnathiformes	anadromous	Least Concern	1.73121	1.73185	0.238349	0.238511	0.238349	0.238511	27.4125	0.18275
0.473829	0.491259	0.0174299	Microphis_contiguus	Syngnathidae	Syngnathiformes	NA	NE/DD	0.473829	0.491259	-0.324378	-0.308689	-0.324378	-0.308689	41.0348	0.0332265
1.23373	1.23381	8.56394e-05	Microphis_deokhatoides	Syngnathidae	Syngnathiformes	NA	NE/DD	1.23372	1.23381	0.0912184	0.0912486	0.091218	0.091249	21.2888	0.120959
26.2118	26.2118	-2.16007e-08	Microphis_martensii	Syngnathidae	Syngnathiformes	NA	NE/DD	26.2118	26.2118	1.4185	1.4185	1.4185	1.4185	-8.24084e-08	0
1.95482	1.9627	0.0078806	Minyclupeoides_dentibranchialus	Ehiravidae	Clupeiformes	NA	Least Concern	1.95482	1.9627	0.291107	0.292855	0.291107	0.292855	4.03304	0.103411
1.49789	1.91961	0.421718	Misgurnus_anguillicaudatus	Cobitidae	Cypriniformes	NA	Least Concern	1.49789	1.91961	0.175481	0.283213	0.175481	0.283213	32.3069	0.101915
0.316224	0.394008	0.0777836	Monopterus_albus	Synbranchidae	Synbranchiformes	potamodromous	Least Concern	0.316224	0.394008	-0.500005	-0.404495	-0.500005	-0.404495	74.0599	0.0248024
15.3366	16.1127	0.776098	Monopterus_javanensis	Synbranchidae	Synbranchiformes	potamodromous	Least Concern	15.3366	16.1127	1.18573	1.20717	1.18573	1.20717	44.7362	2.63154
22.8779	22.8779	2.95912e-08	Moolgarda_cunnesius	Mugilidae	Mugiliformes	catadromous	NE/DD	22.8779	22.8779	1.35942	1.35942	1.35942	1.35942	19.0106	1.46235
19.0896	19.0896	-7.65894e-09	Mugil_cephalus	Mugilidae	Mugiliformes	catadromous	Least Concern	19.0896	19.0896	1.2808	1.2808	1.2808	1.2808	43.9619	1.15689
33.3338	33.3338	-3.87703e-09	Mugilogobius_cavifrons	Gobiidae	Gobiiformes	amphidromous	Least Concern	33.33	33.33	1.52284	1.52284	1.52283	1.52283	-1.16308e-08	0
2.94819	2.94819	1.31858e-08	Mugilogobius_chulae	Gobiidae	Gobiiformes	amphidromous	Least Concern	2.95	2.95	0.469822	0.469822	0.469822	0.469822	4.3868	0.0877361
25.0003	25.0003	1.49064e-09	Mugilogobius_tigrinus	Gobiidae	Gobiiformes	NA	NE/DD	25.0003	25.0003	1.39794	1.39794	1.39794	1.39794	2.24006e-08	2.24006e-08
25.0062	25.0062	-4.43486e-08	Mustura_bella	Nemacheilidae	Cypriniformes	NA	NE/DD	25.0062	25.0062	1.39805	1.39805	1.39805	1.39805	18.3935	1.41488
0.381433	0.390921	0.00948782	Mystacoleucus_atridorsalis	Cyprinidae	Cypriniformes	NA	Least Concern	0.381433	0.390921	-0.418582	-0.407911	-0.418582	-0.407911	33.1302	0.0286099
0.350347	0.372775	0.022428	Mystacoleucus_chilopterus	Cyprinidae	Cypriniformes	NA	Least Concern	0.350347	0.372775	-0.455502	-0.428553	-0.455502	-0.428553	49.8517	0.0282606
1.31191	1.33958	0.0276738	Mystacoleucus_ectypus	Cyprinidae	Cypriniformes	NA	Least Concern	1.31191	1.33958	0.117904	0.12697	0.117904	0.12697	26.8565	0.111902
1.81839	1.86716	0.0487779	Mystacoleucus_greenwayi	Cyprinidae	Cypriniformes	NA	Least Concern	1.81839	1.86716	0.259686	0.271183	0.259686	0.271183	20.7582	0.121393
0.903039	0.990055	0.0870167	Mystacoleucus_lepturus	Cyprinidae	Cypriniformes	NA	Vulnerable	0.903039	0.990055	-0.0442935	-0.00434068	-0.044293	-0.004341	28.0207	0.0761433
0.150462	0.158482	0.00801965	Mystacoleucus_obtusirostris	Cyprinidae	Cypriniformes	NA	Least Concern	0.150462	0.158482	-0.822573	-0.80002	-0.822573	-0.80002	32.0838	0.0116668
1.88245	1.92472	0.0422661	Mystus_albolineatus	Bagridae	Siluriformes	NA	Least Concern	1.88245	1.92472	0.274724	0.284368	0.274724	0.284368	25.5813	0.199854
0.476215	0.488138	0.0119223	Mystus_atrifasciatus	Bagridae	Siluriformes	NA	Least Concern	0.476215	0.488138	-0.322197	-0.311457	-0.322197	-0.311457	23.5255	0.0405611
2.81905	2.91324	0.0941864	Mystus_bocourti	Bagridae	Siluriformes	potamodromous	Vulnerable	2.81905	2.91324	0.450103	0.464376	0.450103	0.464376	23.6449	0.184726
3.95601	4.14121	0.185207	Mystus_cavasius	Bagridae	Siluriformes	amphidromous	Least Concern	3.96	4.14	0.597695	0.617	0.597695	0.617	16.7739	0.729299
25.5683	25.5683	3.46326e-08	Mystus_gulio	Bagridae	Siluriformes	anadromous	Least Concern	25.5683	25.5683	1.4077	1.4077	1.4077	1.4077	15.3609	1.53609
0.312917	0.318558	0.00564115	Mystus_multiradiatus	Bagridae	Siluriformes	NA	Least Concern	0.312917	0.318558	-0.504571	-0.496811	-0.504571	-0.496811	27.7472	0.0268089
0.580375	0.590088	0.00971305	Mystus_mysticetus	Bagridae	Siluriformes	potamodromous	Least Concern	0.580375	0.590088	-0.236291	-0.229083	-0.236291	-0.229083	22.3202	0.0522721
8.10186	8.10186	1.58234e-09	Mystus_nigriceps	Bagridae	Siluriformes	potamodromous	Least Concern	8.10186	8.10186	0.908585	0.908585	0.908585	0.908585	32.1091	1.0703
0.791381	0.819951	0.0285702	Mystus_rhegma	Bagridae	Siluriformes	NA	NE/DD	0.791381	0.819951	-0.101614	-0.0862121	-0.101614	-0.086212	19.3695	0.0624822
0.299263	0.318458	0.0191953	Mystus_singaringan	Bagridae	Siluriformes	potamodromous	Least Concern	0.299263	0.318458	-0.523947	-0.496948	-0.523947	-0.496948	55.3643	0.0271527
7.39625	7.39625	-1.30437e-08	Mystus_velifer	Bagridae	Siluriformes	NA	NE/DD	7.39626	7.39626	0.869012	0.869012	0.869012	0.869012	1.18761	0.0494838
4.17056	4.37942	0.208867	Mystus_vittatus	Bagridae	Siluriformes	NA	Least Concern	4.17056	4.37942	0.620194	0.641417	0.620194	0.641417	9.20122	0.613415
3.22755	3.28658	0.0590301	Mystus_wolffii	Bagridae	Siluriformes	NA	Least Concern	3.22755	3.28658	0.508873	0.516744	0.508873	0.516744	10.0082	0.16963
2.47309	2.5413	0.0682059	Nandus_nandus	Nandidae	Anabantiformes	NA	Least Concern	2.47309	2.5413	0.39324	0.405055	0.39324	0.405055	26.3953	0.361579
31.0286	31.0286	2.73101e-09	Nandus_nebulosus	Nandidae	Anabantiformes	NA	Least Concern	31.0286	31.0286	1.49176	1.49176	1.49176	1.49176	8.80154e-09	0
0.295567	0.302563	0.00699559	Nandus_oxyrhynchus	Nandidae	Anabantiformes	NA	Least Concern	0.295567	0.302563	-0.529344	-0.519184	-0.529344	-0.519184	28.5145	0.0234881
14.32	14.337	0.0170147	Nemacheilus_arenicolus	Nemacheilidae	Cypriniformes	NA	Least Concern	14.32	14.337	1.15594	1.15646	1.15594	1.15646	0.41104	0.0316185
9.30287	9.30287	4.11543e-08	Nemacheilus_argyrogaster	Nemacheilidae	Cypriniformes	NA	NE/DD	9.30287	9.30287	0.968617	0.968617	0.968617	0.968617	5.97465	0.314455
11.1111	16.242	5.13092	Nemacheilus_banar	Nemacheilidae	Cypriniformes	NA	Vulnerable	11.1111	16.242	1.04576	1.21064	1.04576	1.21064	33.4958	0.797519
10.3019	10.3019	-3.92605e-08	Nemacheilus_binotatus	Nemacheilidae	Cypriniformes	NA	NE/DD	10.3019	10.3019	1.01292	1.01292	1.01292	1.01292	28.4205	1.29184
0.667049	0.687507	0.0204576	Nemacheilus_longistriatus	Nemacheilidae	Cypriniformes	NA	Least Concern	0.667049	0.687507	-0.175842	-0.162723	-0.175842	-0.162723	22.5267	0.0554844
2.6525	2.6525	4.20873e-08	Nemacheilus_masyae	Nemacheilidae	Cypriniformes	NA	Least Concern	2.6525	2.6525	0.423655	0.423655	0.423655	0.423655	18.9552	0.2872
0.895242	0.924265	0.0290229	Nemacheilus_pallidus	Nemacheilidae	Cypriniformes	NA	Least Concern	0.895242	0.924265	-0.0480596	-0.0342035	-0.04806	-0.034203	23.1804	0.115902
0.526924	0.535089	0.00816464	Nemacheilus_platiceps	Nemacheilidae	Cypriniformes	NA	NE/DD	0.526924	0.535089	-0.278252	-0.271574	-0.278252	-0.271574	12.8276	0.0309845
12.7837	12.7837	-2.36574e-08	Nemacheilus_zonatus	Nemacheilidae	Cypriniformes	NA	NE/DD	12.7837	12.7837	1.10666	1.10666	1.10666	1.10666	14.6028	0.73014
4.60678	4.60678	3.42301e-08	Neobarynotus_microlepis	Cyprinidae	Cypriniformes	NA	NE/DD	4.60678	4.60678	0.663398	0.663398	0.663398	0.663398	17.3786	0.251863
1.16963	1.17471	0.00507735	Neodontobutis_aurarmus	Odontobutidae	Gobiiformes	NA	Least Concern	1.16963	1.17471	0.06805	0.069931	0.06805	0.069931	10.6225	0.0863616
20.4758	23.9194	3.44355	Neolissochilus_benasi	Cyprinidae	Cypriniformes	NA	NE/DD	20.4758	23.9194	1.31124	1.37875	1.31124	1.37875	17.775	5.925
0.405533	0.456458	0.0509252	Neolissochilus_blanci	Cyprinidae	Cypriniformes	NA	Near Threatened	0.405533	0.456458	-0.391974	-0.340599	-0.391974	-0.340599	46.7805	0.0468273
11.0256	11.0256	2.21545e-08	Neolissochilus_nigrovittatus	Cyprinidae	Cypriniformes	NA	NE/DD	11.0256	11.0256	1.0424	1.0424	1.0424	1.0424	29.4142	1.63412
9.6018	11.6647	2.06285	Neolissochilus_stracheyi	Cyprinidae	Cypriniformes	NA	Least Concern	9.6018	11.6647	0.982353	1.06687	0.982353	1.06687	25.4745	1.6983
50	57.1599	7.15994	Neolissochilus_wynaadensis	Cyprinidae	Cypriniformes	NA	Critically Endangered	50	57.1599	1.69897	1.75709	1.69897	1.75709	12.5261	12.5261
4.70783	4.70783	-8.48494e-09	Neopomacentrus_taeniurus	Pomacentridae	Cichliformes	NA	NE/DD	4.70783	4.70783	0.67282	0.67282	0.67282	0.67282	3.66577	0.093994
30.5953	30.5953	-1.68485e-08	Neosalanx_brevirostris	Salangidae	Osmeriformes	anadromous	NE/DD	30.5953	30.5953	1.48566	1.48566	1.48565	1.48565	0.00413454	0.000516817
0.421375	0.423778	0.00240285	Neostethus_bicornis	Phallostethidae	Atheriniformes	NA	Least Concern	0.421375	0.423778	-0.375331	-0.372862	-0.375331	-0.372862	22.0745	0.0157226
6.72529	6.72529	3.98675e-08	Neostethus_lankesteri	Phallostethidae	Atheriniformes	NA	Least Concern	6.72529	6.72529	0.827711	0.827711	0.827711	0.827711	1.48783	0.0708488
25.6426	25.6426	7.32928e-09	Netuma_thalassina	Ariidae	Siluriformes	amphidromous	Least Concern	25.64	25.64	1.40892	1.40892	1.40892	1.40892	5.02399	0.717714
23.1283	23.1283	-2.26935e-08	Nibea_soldado	Sciaenidae	Acanthuriformes	amphidromous	Least Concern	23.13	23.13	1.36418	1.36418	1.36418	1.36418	37.3178	1.62251
0.241446	0.264881	0.0234349	Notopterus_notopterus	Notopteridae	Osteoglossiformes	potamodromous	Least Concern	0.241446	0.264881	-0.61718	-0.576949	-0.61718	-0.576949	56.0414	0.0232633
10.2078	10.2078	-5.39657e-09	Oligolepis_acutipennis	Gobiidae	Gobiiformes	amphidromous	Least Concern	10.21	10.21	1.00903	1.00903	1.00903	1.00903	1.68831	0.120594
8.81857	8.81857	-1.07698e-09	Omobranchus_ferox	Blenniidae	Blenniiformes	NA	Least Concern	8.81857	8.81857	0.945398	0.945398	0.945398	0.945398	0.0710469	0.003089
21.7855	21.7855	-4.92618e-08	Omox_biporos	Blenniidae	Blenniiformes	NA	Least Concern	21.7855	21.7855	1.33817	1.33817	1.33817	1.33817	3.5856e-06	3.25963e-07
1.2117	1.29307	0.0813672	Ompok_bimaculatus	Siluridae	Siluriformes	potamodromous	Near Threatened	1.2117	1.29306	0.0833944	0.11162	0.083394	0.11162	37.0143	0.111826
7.33527	7.33527	-8.75102e-09	Ompok_eugeneiatus	Siluridae	Siluriformes	NA	Least Concern	7.33527	7.33527	0.865416	0.865416	0.865416	0.865416	8.20002	0.372728
9.71858	9.71858	3.03234e-09	Ompok_hypophthalmus	Siluridae	Siluriformes	NA	Least Concern	9.71858	9.71858	0.987603	0.987603	0.987603	0.987603	17.6163	0.652456
4.29841	4.29841	-9.82505e-09	Ompok_pinnatus	Siluridae	Siluriformes	NA	NE/DD	4.29841	4.29841	0.633308	0.633308	0.633308	0.633308	3.92333	0.103246
0.248235	0.270158	0.0219228	Ompok_siluroides	Siluridae	Siluriformes	NA	Least Concern	0.248235	0.270158	-0.605137	-0.568382	-0.605137	-0.568382	56.0549	0.0238126
0.290189	0.297483	0.00729435	Ompok_urbaini	Siluridae	Siluriformes	NA	Least Concern	0.290189	0.297483	-0.537319	-0.526538	-0.537319	-0.526538	40.6202	0.0255152
9.92899	10.5449	0.615871	Onychostoma_fangi	Cyprinidae	Cypriniformes	NA	NE/DD	9.92899	10.5449	0.996905	1.02304	0.996905	1.02304	15.8607	0.293717
0.981425	1.22282	0.241399	Onychostoma_fusiforme	Cyprinidae	Cypriniformes	NA	Least Concern	0.981425	1.22282	-0.00814288	0.087364	-0.008143	0.087364	48.6953	0.112982
1.77896	2.5753	0.796344	Onychostoma_gerlachi	Cyprinidae	Cypriniformes	NA	Near Threatened	1.77896	2.5753	0.250166	0.410828	0.250166	0.410828	43.8975	0.179174
0.992537	1.0377	0.0451606	Onychostoma_meridionale	Cyprinidae	Cypriniformes	NA	Least Concern	0.992537	1.0377	-0.00325329	0.0160706	-0.003253	0.016071	18.3872	0.0723906
20	21.3019	1.30192	Onychostoma_ovale	Cyprinidae	Cypriniformes	NA	NE/DD	20	21.3019	1.30103	1.32842	1.30103	1.32842	44.5221	3.42478
7.2898	7.97802	0.688224	Onychostoma_simum	Cyprinidae	Cypriniformes	NA	NE/DD	7.2898	7.97802	0.862716	0.901895	0.862716	0.901895	39.2015	0.472307
7.65785	7.65785	-1.73492e-08	Ophichthus_rutidoderma	Ophichthidae	Anguilliformes	NA	NE/DD	7.65785	7.65785	0.884107	0.884107	0.884107	0.884107	27.4758	0.56073
7.30798	7.30798	-7.8877e-09	Ophiocara_porocephala	Eleotridae	Gobiiformes	amphidromous	Least Concern	7.31	7.31	0.863917	0.863917	0.863917	0.863917	24.4048	0.488096
5.83634	6.03592	0.199575	Ophisternon_bengalense	Synbranchidae	Synbranchiformes	NA	Least Concern	5.83634	6.03592	0.766141	0.780743	0.766141	0.780743	15.7424	0.414273
0.868014	1.00731	0.139299	Opsariichthys_bidens	Xenocyprididae	Cypriniformes	NA	Least Concern	0.868014	1.00731	-0.0614733	0.00316444	-0.061473	0.003164	30.0893	0.0804527
13.8377	14.0771	0.239388	Opsarius_barna	Danionidae	Cypriniformes	NA	Least Concern	13.8377	14.0771	1.14106	1.14851	1.14106	1.14851	11.119	0.231645
2.46439	3.05675	0.592369	Opsarius_caudiocellatus	Danionidae	Cypriniformes	NA	NE/DD	2.46439	3.05675	0.391709	0.485261	0.391709	0.485261	25.7557	0.140742
0.308892	0.321289	0.0123967	Opsarius_koratensis	Danionidae	Cypriniformes	NA	Least Concern	0.308892	0.321289	-0.510193	-0.493104	-0.510193	-0.493104	21.8806	0.0250637
0.292099	0.306379	0.0142803	Opsarius_ornatus	Danionidae	Cypriniformes	NA	Least Concern	0.292099	0.306379	-0.53447	-0.513741	-0.53447	-0.513741	23.8646	0.0221378
0.20352	0.214744	0.0112242	Opsarius_pulchellus	Danionidae	Cypriniformes	NA	Least Concern	0.20352	0.214744	-0.691393	-0.668079	-0.691393	-0.668079	28.2587	0.016047
12.7687	12.7687	-4.88967e-08	Oreichthys_parvus	Cyprinidae	Cypriniformes	NA	NE/DD	12.7687	12.7687	1.10615	1.10615	1.10615	1.10615	0.048938	0.00376447
2.64127	3.25396	0.612696	Oreoglanis_delacouri	Sisoridae	Siluriformes	NA	NE/DD	2.64127	3.25396	0.421812	0.512413	0.421812	0.512413	30.4668	0.22568
32.5848	32.5848	-6.86481e-09	Oreoglanis_frenata	Sisoridae	Siluriformes	NA	NE/DD	32.5848	32.5848	1.51302	1.51302	1.51301	1.51301	0.85815	0.429075
33.3333	33.3479	0.0145409	Oreoglanis_hypsiura	Sisoridae	Siluriformes	NA	Least Concern	33.3333	33.3479	1.52288	1.52307	1.52288	1.52307	0.0616899	0.0154225
9.54681	10.2712	0.724407	Oreoglanis_jingdongensis	Sisoridae	Siluriformes	NA	NE/DD	9.54681	10.2712	0.979858	1.01162	0.979858	1.01162	8.00498	0.276034
16.7929	16.8992	0.106343	Oreoglanis_lepturus	Sisoridae	Siluriformes	NA	Critically Endangered	16.7929	16.8992	1.22513	1.22787	1.22513	1.22787	1.70476	0.154978
4.08596	4.19853	0.112565	Oreoglanis_macronemus	Sisoridae	Siluriformes	NA	NE/DD	4.08596	4.19853	0.611295	0.623097	0.611295	0.623097	7.55119	0.130193
1.52474	1.79236	0.26762	Oreoglanis_setigera	Sisoridae	Siluriformes	NA	NE/DD	1.52475	1.79236	0.183197	0.253426	0.183197	0.253426	28.0136	0.0763313
22.4827	22.4827	1.46463e-08	Oreoglanis_suraswadii	Sisoridae	Siluriformes	NA	NE/DD	22.4827	22.4827	1.35185	1.35185	1.35185	1.35185	0.0661184	0.00472274
4.56526	4.56526	-2.02233e-08	Oryzias_haugiangensis	Adrianichthyidae	Beloniformes	NA	NE/DD	4.56526	4.56526	0.659466	0.659466	0.659466	0.659466	2.64484	0.0881612
24.1932	24.1932	4.25308e-08	Oryzias_javanicus	Adrianichthyidae	Beloniformes	non-migratory	Least Concern	24.1932	24.1932	1.38369	1.38369	1.38369	1.38369	6.65968	1.33194
11.1111	12.074	0.962869	Oryzias_latipes	Adrianichthyidae	Beloniformes	amphidromous	Least Concern	11.11	12.07	1.04571	1.08171	1.04571	1.08171	7.97474	0.189875
0.291819	0.294747	0.00292798	Oryzias_mekongensis	Adrianichthyidae	Beloniformes	non-migratory	Least Concern	0.291819	0.294747	-0.534886	-0.530551	-0.534886	-0.530551	15.3677	0.00952742
2.31744	2.31762	0.000175438	Oryzias_minutillus	Adrianichthyidae	Beloniformes	non-migratory	Least Concern	2.31744	2.31762	0.365009	0.365042	0.365009	0.365042	15.4637	0.0739891
20.0186	20.0195	0.000890631	Oryzias_pectoralis	Adrianichthyidae	Beloniformes	NA	NE/DD	20.0186	20.0195	1.30143	1.30145	1.30143	1.30145	0.105006	0.0116673
0.421752	0.438027	0.0162757	Oryzias_sinensis	Adrianichthyidae	Beloniformes	NA	Least Concern	0.421752	0.438027	-0.374943	-0.358499	-0.374943	-0.358499	14.4745	0.0164297
2.33268	2.44124	0.108564	Oryzias_songkhramensis	Adrianichthyidae	Beloniformes	NA	NE/DD	2.33268	2.44124	0.367855	0.387611	0.367855	0.387611	15.8465	0.174137
1.14692	1.27623	0.129308	Osphronemus_exodon	Osphronemidae	Anabantiformes	potamodromous	Vulnerable	1.14692	1.27623	0.0595335	0.105929	0.059534	0.105929	59.7978	0.0978687
3.06398	3.22841	0.164424	Osphronemus_goramy	Osphronemidae	Anabantiformes	NA	Least Concern	3.06399	3.22841	0.486287	0.508988	0.486287	0.508988	40.6876	0.278682
5.04989	5.33027	0.280382	Osteochilus_brachynotopteroides	Cyprinidae	Cypriniformes	NA	NE/DD	5.04989	5.33027	0.703282	0.72675	0.703282	0.72675	50.3604	0.654031
0.642589	0.664667	0.0220781	Osteochilus_lini	Cyprinidae	Cypriniformes	potamodromous	Least Concern	0.642589	0.664667	-0.192067	-0.177396	-0.192067	-0.177396	27.8061	0.0594148
1.40647	1.52172	0.115244	Osteochilus_melanopleura	Cyprinidae	Cypriniformes	potamodromous	Least Concern	1.40647	1.52171	0.148131	0.182333	0.148131	0.182333	54.8306	0.0948627
0.985892	1.0216	0.0357125	Osteochilus_microcephalus	Cyprinidae	Cypriniformes	NA	Least Concern	0.985892	1.0216	-0.00617066	0.00928258	-0.006171	0.009283	29.7146	0.0866316
0.889697	0.912455	0.0227588	Osteochilus_schlegelii	Cyprinidae	Cypriniformes	NA	NE/DD	0.889697	0.912455	-0.0507579	-0.0397885	-0.050758	-0.039789	50.5444	0.0650507
13.056	13.056	-4.25927e-09	Osteochilus_striatus	Cyprinidae	Cypriniformes	NA	NE/DD	13.056	13.056	1.11581	1.11581	1.11581	1.11581	0.19955	0.01535
0.45725	0.482738	0.0254878	Osteochilus_vittatus	Cyprinidae	Cypriniformes	potamodromous	Least Concern	0.45725	0.482738	-0.339846	-0.316289	-0.339846	-0.316289	45.9468	0.0344428
0.450894	0.457927	0.00703335	Osteochilus_waandersii	Cyprinidae	Cypriniformes	potamodromous	Least Concern	0.450894	0.457927	-0.345926	-0.339204	-0.345926	-0.339204	36.0309	0.0341201
16.4584	16.4584	1.69296e-08	Osteogeneiosus_militaris	Ariidae	Siluriformes	potamodromous	NE/DD	16.4584	16.4584	1.21639	1.21639	1.21639	1.21639	0.980504	0.163417
42.8496	42.8496	3.76624e-08	Otolithes_ruber	Sciaenidae	Acanthuriformes	amphidromous	Least Concern	42.85	42.85	1.63195	1.63195	1.63195	1.63195	10.4454	1.7409
25.0046	25.0046	4.01074e-08	Oxuderces_dentatus	Gobiidae	Gobiiformes	amphidromous	NE/DD	25	25	1.39794	1.39794	1.39794	1.39794	0.00916981	0.00114623
0.532618	0.562158	0.0295406	Oxyeleotris_marmorata	Eleotridae	Gobiiformes	potamodromous	Least Concern	0.532618	0.562158	-0.273584	-0.250142	-0.273584	-0.250142	42.2015	0.0545945
13.8912	13.8912	-1.92785e-08	Oxyeleotris_siamensis	Eleotridae	Gobiiformes	NA	NE/DD	13.8912	13.8912	1.14274	1.14274	1.14274	1.14274	4.10068	0.341723
7.61545	7.61545	-1.9537e-08	Oxyeleotris_urophthalmus	Eleotridae	Gobiiformes	NA	NE/DD	7.61545	7.61545	0.881696	0.881696	0.881696	0.881696	24.318	0.528652
1.14999	1.17737	0.0273866	Oxygaster_anomalura	Xenocyprididae	Cypriniformes	NA	Least Concern	1.14999	1.17737	0.0606926	0.0709141	0.060693	0.070914	32.0663	0.130351
0.510869	0.529075	0.0182057	Oxygaster_pointoni	Xenocyprididae	Cypriniformes	NA	Vulnerable	0.510869	0.529075	-0.29169	-0.276483	-0.29169	-0.276483	27.3328	0.0437324
20.6595	20.6595	4.311e-09	Oxyurichthys_microlepis	Gobiidae	Gobiiformes	amphidromous	Least Concern	20.66	20.66	1.31513	1.31513	1.31513	1.31513	2.90644	0.363305
23.6094	23.6094	-2.16652e-08	Pampus_chinensis	Stromateidae	Scombriformes	amphidromous	NE/DD	23.61	23.61	1.3731	1.3731	1.3731	1.3731	10.9891	1.09891
3.25766	3.35949	0.101826	Pangasianodon_gigas	Pangasiidae	Siluriformes	potamodromous	Critically Endangered	3.25766	3.35948	0.512906	0.526273	0.512906	0.526273	34.4781	0.194791
0.59127	0.639665	0.0483956	Pangasianodon_hypophthalmus	Pangasiidae	Siluriformes	potamodromous	Endangered	0.59127	0.639665	-0.228214	-0.194047	-0.228214	-0.194047	72.9677	0.0399604
1.34614	1.53805	0.191908	Pangasius_bocourti	Pangasiidae	Siluriformes	potamodromous	Least Concern	1.34614	1.53805	0.129091	0.186971	0.129091	0.186971	53.7374	0.0928107
1.46341	1.66425	0.20084	Pangasius_conchophilus	Pangasiidae	Siluriformes	potamodromous	Least Concern	1.46341	1.66425	0.165365	0.221218	0.165365	0.221218	52.2754	0.0953931
13.4751	13.4751	2.82151e-08	Pangasius_djambal	Pangasiidae	Siluriformes	potamodromous	Least Concern	13.4751	13.4751	1.12953	1.12953	1.12953	1.12953	8.58417	0.613155
1.50333	1.70816	0.204828	Pangasius_elongatus	Pangasiidae	Siluriformes	NA	NE/DD	1.50333	1.70816	0.177054	0.232527	0.177054	0.232527	51.912	0.108602
1.26888	1.44824	0.179364	Pangasius_krempfi	Pangasiidae	Siluriformes	potamodromous	Vulnerable	1.26888	1.44824	0.10342	0.160841	0.10342	0.160841	57.7916	0.0961591
14.8281	14.8281	-4.60291e-08	Pangasius_kunyit	Pangasiidae	Siluriformes	NA	Least Concern	14.8281	14.8281	1.17108	1.17108	1.17108	1.17108	16.6597	3.33194
1.27305	1.432	0.158944	Pangasius_larnaudii	Pangasiidae	Siluriformes	potamodromous	Least Concern	1.27305	1.432	0.104846	0.155942	0.104846	0.155942	55.2616	0.0946261
0.523232	0.594006	0.0707738	Pangasius_macronema	Pangasiidae	Siluriformes	potamodromous	Least Concern	0.523232	0.594006	-0.281306	-0.226209	-0.281306	-0.226209	74.0228	0.0384135
1.21662	1.37919	0.162572	Pangasius_mekongensis	Pangasiidae	Siluriformes	NA	Least Concern	1.21662	1.37919	0.0851553	0.139625	0.085155	0.139625	55.9646	0.0956661
13.2938	14.1439	0.850163	Pangasius_nasutus	Pangasiidae	Siluriformes	NA	Least Concern	13.2938	14.1439	1.12365	1.15057	1.12365	1.15057	12.7236	1.81766
11.1965	11.1965	-4.71528e-08	Pangasius_polyuranodon	Pangasiidae	Siluriformes	potamodromous	Least Concern	11.1965	11.1965	1.04908	1.04908	1.04908	1.04908	11.073	0.481436
36.1015	36.1015	3.26524e-08	Pangasius_sabahensis	Pangasiidae	Siluriformes	NA	NE/DD	36.1015	36.1015	1.55753	1.55753	1.55753	1.55753	7.38464	1.05495
0.952323	1.11387	0.16155	Pangasius_sanitwongsei	Pangasiidae	Siluriformes	potamodromous	Critically Endangered	0.952323	1.11387	-0.0212157	0.0468357	-0.021216	0.046836	59.2704	0.0807499
0.435898	0.44516	0.00926211	Pangio_anguillaris	Cobitidae	Cypriniformes	NA	Least Concern	0.435898	0.44516	-0.360615	-0.351484	-0.360615	-0.351484	23.7535	0.0275562
7.87531	8.17425	0.298937	Pangio_fusca	Cobitidae	Cypriniformes	NA	NE/DD	7.87531	8.17425	0.896268	0.912448	0.896268	0.912448	5.52138	0.92023
1.64234	1.65141	0.00906576	Pangio_myersi	Cobitidae	Cypriniformes	NA	Least Concern	1.64234	1.65141	0.215463	0.217854	0.215463	0.217854	6.51762	0.116386
0.168204	0.171296	0.00309189	Pangio_oblonga	Cobitidae	Cypriniformes	NA	Least Concern	0.168204	0.171296	-0.774164	-0.766253	-0.774164	-0.766253	23.3493	0.0104099
0.444889	0.447129	0.00224054	Pangio_piperata	Cobitidae	Cypriniformes	NA	Least Concern	0.444889	0.447129	-0.351748	-0.349567	-0.351748	-0.349567	20.1194	0.0189448
50.0053	50.0053	3.22353e-09	Panna_microdon	Sciaenidae	Acanthuriformes	NA	Least Concern	50.0053	50.0053	1.69902	1.69902	1.69902	1.69902	6.44632e-09	0
0.50842	0.521901	0.0134806	Pao_abei	Tetraodontidae	Tetraodontiformes	NA	Least Concern	0.50842	0.521901	-0.293777	-0.282412	-0.293777	-0.282412	28.5696	0.0423881
1.88469	1.95471	0.0700212	Pao_baileyi	Tetraodontidae	Tetraodontiformes	NA	Least Concern	1.88469	1.95471	0.275241	0.291083	0.275241	0.291083	13.3378	0.272199
20.7763	21.6737	0.897422	Pao_barbatus	Tetraodontidae	Tetraodontiformes	NA	NE/DD	20.7763	21.6737	1.31757	1.33593	1.31757	1.33593	7.95196	3.97598
3.01225	3.01225	-1.90079e-08	Pao_brevirostris	Tetraodontidae	Tetraodontiformes	NA	Least Concern	3.01225	3.01225	0.478891	0.478891	0.478891	0.478891	4.90166	0.0680786
0.537855	0.540851	0.00299605	Pao_cochinchinensis	Tetraodontidae	Tetraodontiformes	NA	Least Concern	0.537855	0.540851	-0.269335	-0.266922	-0.269335	-0.266922	16.5944	0.0367946
0.999889	1.03004	0.0301462	Pao_leiurus	Tetraodontidae	Tetraodontiformes	NA	Least Concern	0.999889	1.03004	-4.82094e-05	0.012852	-4.8e-05	0.012852	19.8981	0.0715758
0.397052	0.408029	0.0109771	Pao_palembangensis	Tetraodontidae	Tetraodontiformes	NA	Least Concern	0.397052	0.408029	-0.401153	-0.389309	-0.401153	-0.389309	55.5689	0.0329982
1.5262	1.59513	0.0689299	Pao_suvattii	Tetraodontidae	Tetraodontiformes	NA	Least Concern	1.5262	1.59513	0.183613	0.202797	0.183613	0.202797	23.5564	0.140216
1.15981	1.26824	0.108434	Pao_turgidus	Tetraodontidae	Tetraodontiformes	NA	Least Concern	1.1598	1.26824	0.064385	0.103201	0.064385	0.103201	26.2185	0.111095
0.423665	0.444864	0.0211996	Papuligobius_ocellatus	Gobiidae	Gobiiformes	NA	Least Concern	0.423665	0.444864	-0.372977	-0.351773	-0.372977	-0.351773	22.202	0.0362778
0.443515	0.445864	0.0023494	Parachela_maculicauda	Xenocyprididae	Cypriniformes	NA	Least Concern	0.443515	0.445864	-0.353092	-0.350798	-0.353092	-0.350798	19.8839	0.030036
0.263378	0.287705	0.0243272	Parachela_oxygastroides	Xenocyprididae	Cypriniformes	NA	Least Concern	0.263378	0.287705	-0.579421	-0.541053	-0.579421	-0.541053	55.0978	0.0240182
0.610521	0.619507	0.00898524	Parachela_siamensis	Xenocyprididae	Cypriniformes	NA	Least Concern	0.610521	0.619507	-0.214299	-0.207954	-0.214299	-0.207954	35.959	0.0540737
0.591076	0.610962	0.0198854	Parachela_williaminae	Xenocyprididae	Cypriniformes	NA	Least Concern	0.591076	0.610962	-0.228357	-0.213986	-0.228357	-0.213986	30.7204	0.0503614
0.413545	0.442487	0.0289423	Paralaubuca_barroni	Xenocyprididae	Cypriniformes	NA	Least Concern	0.413545	0.442487	-0.383477	-0.354099	-0.383477	-0.354099	53.9349	0.0372994
1.22073	1.25903	0.0383017	Paralaubuca_harmandi	Xenocyprididae	Cypriniformes	NA	Least Concern	1.22073	1.25903	0.0866186	0.100036	0.086619	0.100036	31.8034	0.090608
0.442943	0.46228	0.0193372	Paralaubuca_riveroi	Xenocyprididae	Cypriniformes	NA	Least Concern	0.442943	0.46228	-0.353652	-0.335095	-0.353652	-0.335095	35.0266	0.037663
0.712061	0.723686	0.0116255	Paralaubuca_typus	Xenocyprididae	Cypriniformes	potamodromous	Least Concern	0.712061	0.723686	-0.147483	-0.14045	-0.147483	-0.14045	22.4088	0.0527265
0.35715	0.360123	0.00297235	Parambassis_apogonoides	Ambassidae	Cichliformes	NA	Least Concern	0.357151	0.360123	-0.447148	-0.443549	-0.447148	-0.443549	34.6929	0.0238603
2.51194	2.55663	0.04469	Parambassis_ranga	Ambassidae	Cichliformes	potamodromous	Least Concern	2.51194	2.55663	0.400009	0.407667	0.400009	0.407667	13.5404	0.163138
0.204853	0.210712	0.00585898	Parambassis_siamensis	Ambassidae	Cichliformes	NA	Least Concern	0.204853	0.210712	-0.688558	-0.676311	-0.688558	-0.676311	31.6064	0.0151372
0.487347	0.500074	0.0127268	Parambassis_wolffii	Ambassidae	Cichliformes	NA	Least Concern	0.487347	0.500074	-0.312162	-0.300966	-0.312162	-0.300966	51.7882	0.0388217
6.55566	6.62815	0.0724977	Paramugil_parmatus	Mugilidae	Mugiliformes	catadromous	Least Concern	6.55566	6.62815	0.816616	0.821393	0.816616	0.821393	25.8346	0.516692
25.8012	25.8012	4.25956e-08	Paraplagusia_bilineata	Cynoglossidae	Carangiformes	NA	Least Concern	25.8012	25.8012	1.41164	1.41164	1.41164	1.41164	2.04752	0.170627
13.0529	13.0529	4.25256e-08	Parapocryptes_serperaster	Gobiidae	Gobiiformes	amphidromous	Least Concern	13.05	13.05	1.11561	1.11561	1.11561	1.11561	3.34543	0.418178
2.39992	2.43916	0.0392334	Parasikukia_maculata	Cyprinidae	Cypriniformes	NA	Least Concern	2.39993	2.43916	0.380198	0.38724	0.380198	0.38724	10.7559	0.228849
32.1435	32.1435	-4.62968e-08	Parastromateus_niger	Carangidae	Carangiformes	amphidromous	Least Concern	32.14	32.14	1.50705	1.50705	1.50705	1.50705	23.1589	2.31589
8.33333	11.8815	3.54818	Percocypris_regani	Cyprinidae	Cypriniformes	NA	NE/DD	8.33333	11.8815	0.920819	1.07487	0.920819	1.07487	30.7521	0.683379
4.36169	6.31668	1.95499	Percocypris_retrodorsalis	Cyprinidae	Cypriniformes	NA	NE/DD	4.36169	6.31668	0.639654	0.800489	0.639654	0.800489	36.0555	0.487237
2.00674	2.7791	0.77236	Percocypris_tchangi	Cyprinidae	Cypriniformes	NA	NE/DD	2.00674	2.7791	0.30249	0.443904	0.30249	0.443904	38.4579	0.180554
12.6997	12.6997	-4.79394e-08	Periophthalmodon_schlosseri	Gobiidae	Gobiiformes	amphidromous	Least Concern	12.7	12.7	1.1038	1.1038	1.1038	1.1038	0.598409	0.0460315
3.15165	3.15165	-9.31006e-09	Periophthalmodon_septemradiatus	Gobiidae	Gobiiformes	amphidromous	Least Concern	3.15	3.15	0.498311	0.498311	0.498311	0.498311	7.27998	0.127719
11.2431	11.2431	-4.77687e-08	Periophthalmus_chrysospilos	Gobiidae	Gobiiformes	NA	Least Concern	11.2431	11.2431	1.05089	1.05089	1.05089	1.05089	0.000724387	0.000362194
16.6668	16.6668	3.54261e-08	Periophthalmus_gracilis	Gobiidae	Gobiiformes	NA	NE/DD	16.6668	16.6668	1.22185	1.22185	1.22185	1.22185	7.39877e-05	1.05697e-05
20.0008	20.0008	2.43368e-08	Periophthalmus_variabilis	Gobiidae	Gobiiformes	NA	NE/DD	20.0008	20.0008	1.30105	1.30105	1.30105	1.30105	2.27139e-07	2.27139e-07
4.37793	4.48411	0.106185	Pethia_stoliczkana	Cyprinidae	Cypriniformes	NA	Least Concern	4.37793	4.48411	0.641268	0.651676	0.641268	0.651676	12.6089	0.331814
5.03031	6.16348	1.13316	Pethia_ticto	Cyprinidae	Cypriniformes	potamodromous	Least Concern	5.03031	6.16348	0.701595	0.789826	0.701595	0.789826	27.6633	1.06397
0.578635	0.637556	0.0589213	Phalacronotus_apogon	Siluridae	Siluriformes	potamodromous	Least Concern	0.578635	0.637556	-0.237595	-0.195482	-0.237595	-0.195482	71.9599	0.0383377
1.33445	1.48619	0.151741	Phalacronotus_bleekeri	Siluridae	Siluriformes	potamodromous	Least Concern	1.33445	1.48619	0.125301	0.172073	0.125301	0.172073	52.6286	0.111976
0.705238	0.737057	0.0318185	Phalacronotus_micronemus	Siluridae	Siluriformes	NA	Least Concern	0.705238	0.737057	-0.151664	-0.132499	-0.151664	-0.132499	74.3738	0.043775
10.7078	10.7078	-4.84051e-08	Phallostethus_cuulong	Phallostethidae	Atheriniformes	NA	Least Concern	10.7078	10.7078	1.0297	1.0297	1.0297	1.0297	1.92961	0.214401
5.08572	5.08572	3.76067e-08	Phenablennius_heyligeri	Blenniidae	Blenniiformes	NA	NE/DD	5.08572	5.08572	0.706353	0.706353	0.706353	0.706353	7.387	0.194395
0.356027	0.358142	0.00211482	Phenacostethus_posthon	Phallostethidae	Atheriniformes	NA	Least Concern	0.356027	0.358142	-0.448517	-0.445945	-0.448517	-0.445945	20.8369	0.0126055
3.85805	3.85805	-3.45067e-09	Phenacostethus_smithi	Phallostethidae	Atheriniformes	NA	Least Concern	3.85805	3.85805	0.586367	0.586367	0.586367	0.586367	11.574	0.269163
50.0003	50.0003	1.45908e-08	Photopectoralis_bindus	Leiognathidae	Acanthuriformes	amphidromous	NE/DD	50	50	1.69897	1.69897	1.69897	1.69897	2.91814e-08	0
0.552168	0.55797	0.00580196	Physoschistura_pseudobrunneana	Nemacheilidae	Cypriniformes	NA	Least Concern	0.552168	0.55797	-0.257929	-0.253389	-0.257929	-0.253389	16.779	0.043023
31.8606	31.8606	2.63657e-08	Physoschistura_raoi	Nemacheilidae	Cypriniformes	NA	NE/DD	31.8606	31.8606	1.50325	1.50325	1.50325	1.50325	8.46957	0.651505
3.49953	3.69184	0.192308	Physoschistura_shuangjiangensis	Nemacheilidae	Cypriniformes	NA	NE/DD	3.49953	3.69184	0.54401	0.567243	0.54401	0.567243	6.10936	0.0736068
15.6176	15.6176	1.59306e-08	Piaractus_brachypomus	Serrasalmidae	Characiformes	NA	NE/DD	15.6176	15.6176	1.19361	1.19361	1.19362	1.19362	13.9303	1.74129
28.4133	28.4133	1.10383e-08	Pisodonophis_boro	Ophichthidae	Anguilliformes	anadromous	Least Concern	28.4133	28.4133	1.45352	1.45352	1.45352	1.45352	17.092	2.13651
50.0325	50.0325	1.02148e-08	Pisodonophis_cancrivorus	Ophichthidae	Anguilliformes	anadromous	Least Concern	50.0325	50.0325	1.69925	1.69925	1.69925	1.69925	1.38577	0.153975
1.55345	1.86542	0.311963	Placocheilus_cryptonemus	Cyprinidae	Cypriniformes	NA	Least Concern	1.55345	1.86542	0.191298	0.270776	0.191298	0.270776	30.3117	0.0844337
9.18047	9.18047	-4.79174e-08	Planiliza_macrolepis	Mugilidae	Mugiliformes	catadromous	Least Concern	9.18047	9.18047	0.962865	0.962865	0.962865	0.962865	24.2904	0.552056
12.3828	12.3828	1.30829e-08	Planiliza_planiceps	Mugilidae	Mugiliformes	catadromous	Least Concern	12.3828	12.3828	1.09282	1.09282	1.09282	1.09282	35.5609	0.623875
5.91511	5.91511	1.61307e-08	Planiliza_subviridis	Mugilidae	Mugiliformes	catadromous	Least Concern	5.91511	5.91511	0.771963	0.771963	0.771963	0.771963	19.5986	0.343834
16.0396	16.0396	1.34844e-08	Planiliza_tade	Mugilidae	Mugiliformes	NA	NE/DD	16.0396	16.0396	1.20519	1.20519	1.20519	1.20519	34.6988	0.708139
28.0735	28.0735	-4.4909e-08	Platycephalus_indicus	Platycephalidae	Perciformes	amphidromous	NE/DD	28.07	28.07	1.44824	1.44824	1.44824	1.44824	13.2928	1.02252
15.2105	15.2105	5.04574e-09	Plectorhinchus_gibbosus	Haemulidae	Acanthuriformes	NA	Least Concern	15.2105	15.2105	1.18214	1.18214	1.18214	1.18214	35.4073	0.722599
14.3977	14.3977	1.27229e-08	Plotosus_canius	Plotosidae	Siluriformes	amphidromous	NE/DD	14.4	14.4	1.15836	1.15836	1.15836	1.15836	6.09174	0.358337
0.572758	0.573235	0.00047664	Poecilia_reticulata	Poeciliidae	Cyprinodontiformes	non-migratory	Least Concern	0.572758	0.573235	-0.242029	-0.241667	-0.242029	-0.241667	6.78956	0.0265217
1.26548	1.28997	0.0244872	Polynemus_aquilonaris	Polynemidae	Carangiformes	NA	Least Concern	1.26548	1.28997	0.102257	0.11058	0.102257	0.11058	34.3816	0.13483
34.1125	34.1125	2.9254e-08	Polynemus_bidentatus	Polynemidae	Carangiformes	NA	NE/DD	34.1125	34.1125	1.53291	1.53291	1.53291	1.53291	6.43252	0.804065
5.35748	5.35748	4.59364e-08	Polynemus_dubius	Polynemidae	Carangiformes	potamodromous	Least Concern	5.35748	5.35748	0.72896	0.72896	0.72896	0.72896	9.73526	0.231792
1.66365	1.66365	1.74961e-08	Polynemus_melanochir	Polynemidae	Carangiformes	NA	Least Concern	1.66365	1.66365	0.221061	0.221061	0.221061	0.221061	30.181	0.187459
9.28972	9.28972	-3.10936e-08	Polynemus_paradiseus	Polynemidae	Carangiformes	amphidromous	Least Concern	9.29	9.29	0.968016	0.968016	0.968016	0.968016	19.0544	0.529289
16.0539	16.0539	3.21417e-08	Pomadasys_argenteus	Haemulidae	Acanthuriformes	NA	Least Concern	16.0539	16.0539	1.20558	1.20558	1.20558	1.20558	21.3708	0.971399
20.9391	20.9391	3.24489e-08	Pomadasys_maculatus	Haemulidae	Acanthuriformes	amphidromous	Least Concern	20.94	20.94	1.32098	1.32098	1.32098	1.32098	1.47067	0.245111
2.36781	2.74127	0.373468	Poropuntius_angustus	Cyprinidae	Cypriniformes	NA	NE/DD	2.36781	2.74127	0.374346	0.437953	0.374346	0.437953	37.4053	0.265286
5.96538	5.99383	0.0284562	Poropuntius_bolovenensis	Cyprinidae	Cypriniformes	NA	Endangered	5.96538	5.99383	0.775638	0.777705	0.775638	0.777705	11.9613	0.543694
0.729299	0.850046	0.120747	Poropuntius_carinatus	Cyprinidae	Cypriniformes	NA	Least Concern	0.729299	0.850046	-0.137094	-0.0705576	-0.137094	-0.070558	35.5143	0.0814549
14.2857	20.5316	6.2459	Poropuntius_cogginii	Cyprinidae	Cypriniformes	NA	NE/DD	14.2857	20.5316	1.1549	1.31242	1.1549	1.31242	31.6006	0.987517
5.46663	5.48153	0.0149031	Poropuntius_consternans	Cyprinidae	Cypriniformes	NA	Endangered	5.46663	5.48153	0.73772	0.738902	0.73772	0.738902	9.00314	0.409234
11.1111	15.5944	4.48326	Poropuntius_daliensis	Cyprinidae	Cypriniformes	NA	NE/DD	11.1111	15.5944	1.04576	1.19297	1.04576	1.19297	29.7106	0.900323
2.98713	3.17337	0.186241	Poropuntius_deauratus	Cyprinidae	Cypriniformes	potamodromous	Endangered	2.98713	3.17337	0.475254	0.501521	0.475254	0.501521	17.9514	0.747973
1.64709	2.39534	0.748252	Poropuntius_huangchuchieni	Cyprinidae	Cypriniformes	NA	NE/DD	1.64709	2.39534	0.216718	0.379368	0.216718	0.379368	54.7306	0.138209
5.53121	6.3864	0.855185	Poropuntius_kontumensis	Cyprinidae	Cypriniformes	non-migratory	NE/DD	5.53121	6.3864	0.74282	0.805256	0.74282	0.805256	26.601	0.345467
4.17836	5.71045	1.53209	Poropuntius_krempfi	Cyprinidae	Cypriniformes	NA	NE/DD	4.17836	5.71045	0.621006	0.75667	0.621006	0.75667	35.4015	0.411646
0.675248	0.755621	0.0803723	Poropuntius_laoensis	Cyprinidae	Cypriniformes	non-migratory	Least Concern	0.675248	0.755621	-0.170537	-0.121696	-0.170537	-0.121696	40.825	0.0686134
0.83469	0.882384	0.047694	Poropuntius_normani	Cyprinidae	Cypriniformes	NA	Least Concern	0.83469	0.882384	-0.0784748	-0.0543424	-0.078475	-0.054342	33.4744	0.082045
16.6667	16.6667	-3.33333e-08	Poropuntius_speleops	Cyprinidae	Cypriniformes	NA	Vulnerable	16.6667	16.6667	1.22185	1.22185	1.22185	1.22185	1.06305	0.0128078
33.3583	33.3583	-4.4732e-08	Pristis_pristis	Pristidae	Rhinopristiformes	amphidromous	Critically Endangered	33.36	33.36	1.52323	1.52323	1.52323	1.52323	50.9006	50.9006
0.287063	0.294674	0.00761096	Pristolepis_fasciata	Pristolepididae	Anabantiformes	potamodromous	Least Concern	0.287063	0.294674	-0.542023	-0.530658	-0.542023	-0.530658	42.0412	0.0234082
2.89176	3.18203	0.290265	Probarbus_jullieni	Cyprinidae	Cypriniformes	potamodromous	Critically Endangered	2.89176	3.18203	0.461163	0.502704	0.461163	0.502704	37.1894	0.192691
4.41105	4.93973	0.528685	Probarbus_labeamajor	Cyprinidae	Cypriniformes	potamodromous	Endangered	4.41104	4.93973	0.644541	0.693703	0.644541	0.693703	40.5283	0.324226
6.70205	7.04103	0.33898	Probarbus_labeaminor	Cyprinidae	Cypriniformes	NA	Near Threatened	6.70205	7.04103	0.826207	0.847636	0.826207	0.847636	46.0127	0.422134
9.24075	9.24075	4.5376e-08	Pseudapocryptes_elongatus	Gobiidae	Gobiiformes	amphidromous	Least Concern	9.24	9.24	0.965672	0.965672	0.965672	0.965672	0.0814118	0.00508824
1.11553	1.31151	0.195979	Pseudecheneis_immaculata	Sisoridae	Siluriformes	NA	NE/DD	1.11553	1.31151	0.0474816	0.117772	0.047482	0.117772	26.7788	0.0601772
2.60868	3.28594	0.67726	Pseudecheneis_sulcata	Sisoridae	Siluriformes	NA	Least Concern	2.60868	3.28594	0.41642	0.516659	0.41642	0.516659	24.9389	0.158847
2.49646	3.19399	0.697527	Pseudecheneis_sulcatoides	Sisoridae	Siluriformes	NA	NE/DD	2.49646	3.19399	0.397325	0.504334	0.397325	0.504334	27.5055	0.170841
2.67859	2.80461	0.126014	Pseudecheneis_sympelvica	Sisoridae	Siluriformes	NA	NE/DD	2.67859	2.80461	0.427907	0.447872	0.427907	0.447872	12.1084	0.153271
57.8696	57.8696	2.16081e-08	Pseudobagarius_eustictus	Akysidae	Siluriformes	NA	NE/DD	57.8696	57.8696	1.76245	1.76245	1.76245	1.76245	28.9754	7.24386
2.02223	2.02223	2.84512e-08	Pseudobagarius_filifer	Akysidae	Siluriformes	NA	NE/DD	2.02223	2.02223	0.30583	0.30583	0.30583	0.30583	5.27113	0.109815
0.446359	0.461121	0.0147621	Pseudobagarius_inermis	Akysidae	Siluriformes	NA	NE/DD	0.446359	0.461121	-0.350316	-0.336185	-0.350316	-0.336185	9.23975	0.0237526
3.32278	3.35817	0.0353806	Pseudobagarius_nitidus	Akysidae	Siluriformes	NA	NE/DD	3.32278	3.35817	0.521502	0.526102	0.521502	0.526102	7.81754	0.289539
4.2653	4.2653	2.25262e-08	Pseudobagarius_similis	Akysidae	Siluriformes	NA	Least Concern	4.2653	4.2653	0.62995	0.62995	0.62995	0.62995	4.02993	0.125935
9.03599	9.28459	0.24861	Pseudobagarius_sinensis	Akysidae	Siluriformes	NA	NE/DD	9.03599	9.28459	0.955976	0.967763	0.955976	0.967763	8.85516	0.145167
3.86205	3.86642	0.0043707	Pseudobagarius_subtilis	Akysidae	Siluriformes	NA	NE/DD	3.86205	3.86642	0.586818	0.587309	0.586818	0.587309	3.87089	0.0716831
1.27059	1.2706	3.24645e-06	Pseudogobiopsis_oligactis	Gobiidae	Gobiiformes	NA	Least Concern	1.27059	1.27059	0.104006	0.104007	0.104006	0.104007	10.5446	0.0909017
2.64094	2.64094	2.44397e-08	Pseudogobiopsis_paludosa	Gobiidae	Gobiiformes	NA	Least Concern	2.64094	2.64094	0.421759	0.421759	0.421759	0.421759	1.29867	0.0231905
25	25	3.2003e-08	Pseudogobius_avicennia	Gobiidae	Gobiiformes	NA	NE/DD	25	25	1.39794	1.39794	1.39794	1.39794	1.3474e-07	1.3474e-07
3.39192	3.39192	2.57627e-08	Pseudogobius_melanosticta	Gobiidae	Gobiiformes	amphidromous	Least Concern	3.39	3.39	0.5302	0.5302	0.5302	0.5302	2.80857	0.0720146
2.14592	2.14599	7.40411e-05	Pseudogobius_poicilosoma	Gobiidae	Gobiiformes	amphidromous	Least Concern	2.15	2.15	0.332438	0.332438	0.332438	0.332438	6.62287	0.0752598
7.66907	13.271	5.60189	Pseudohemiculter_dispar	Xenocyprididae	Cypriniformes	NA	Vulnerable	7.66907	13.271	0.884743	1.1229	0.884743	1.1229	43.5294	3.10924
3.05146	3.07993	0.0284685	Pseudohomaloptera_leonardi	Balitoridae	Cypriniformes	NA	Least Concern	3.05146	3.07993	0.484507	0.48854	0.484507	0.48854	7.02154	0.111453
33.3333	33.3333	3.33333e-08	Pseudohomaloptera_sexmaculata	Balitoridae	Cypriniformes	NA	NE/DD	33.3333	33.3333	1.52288	1.52288	1.52288	1.52288	6.47347	0.539456
25	25.0263	0.0263205	Pseudohomaloptera_vulgaris	Balitoridae	Cypriniformes	NA	NE/DD	25	25.0263	1.39794	1.3984	1.39794	1.3984	0.105172	0.00194763
0.314476	0.330981	0.0165048	Pseudohomaloptera_yunnanensis	Balitoridae	Cypriniformes	NA	Least Concern	0.314476	0.330981	-0.502412	-0.480197	-0.502412	-0.480197	16.3256	0.0178033
0.740992	0.877335	0.136343	Pseudolais_micronemus	Pangasiidae	Siluriformes	potamodromous	Least Concern	0.740992	0.877335	-0.130186	-0.0568345	-0.130186	-0.056835	63.0794	0.0520028
2.31443	2.48783	0.173402	Pseudolais_pleurotaenia	Pangasiidae	Siluriformes	potamodromous	Least Concern	2.31443	2.48783	0.364444	0.395821	0.364444	0.395821	44.3223	0.149233
33.3333	34.9594	1.62609	Pseudolaubuca_sinensis	Xenocyprididae	Cypriniformes	NA	Least Concern	33.3333	34.9594	1.52288	1.54356	1.52288	1.54356	4.68825	0.13395
0.196641	0.208447	0.0118064	Pseudomystus_siamensis	Bagridae	Siluriformes	NA	Least Concern	0.196641	0.208447	-0.706326	-0.681004	-0.706326	-0.681004	42.0778	0.0178674
47.6197	47.6197	1.71628e-08	Pseudomystus_stenomus	Bagridae	Siluriformes	NA	Least Concern	47.6197	47.6197	1.67779	1.67779	1.67779	1.67779	3.60414e-08	0
50	50	0	Pterocryptis_cochinchinensis	Siluridae	Siluriformes	NA	Least Concern	50	50	1.69897	1.69897	1.69897	1.69897	0.000136847	2.28079e-05
20.4098	20.6477	0.237888	Pterocryptis_inusitata	Siluridae	Siluriformes	NA	Endangered	20.4098	20.6477	1.30984	1.31487	1.30984	1.31487	3.91461	0.652435
1.91109	2.19375	0.282662	Pteronemacheilus_meridionalis	Nemacheilidae	Cypriniformes	NA	NE/DD	1.91108	2.19375	0.28128	0.341187	0.28128	0.341187	16.9824	0.0840715
5.73627	6.59176	0.855495	Ptychobarbus_kaznakovi	Cyprinidae	Cypriniformes	NA	NE/DD	5.73627	6.59176	0.758629	0.819002	0.758629	0.819002	30.4778	0.358563
0.445428	0.449763	0.00433476	Puntigrus_partipentazona	Cyprinidae	Cypriniformes	NA	Least Concern	0.445428	0.449763	-0.351222	-0.347016	-0.351222	-0.347016	9.96463	0.0177623
5.00954	5.31757	0.308031	Puntioplites_bulu	Cyprinidae	Cypriniformes	NA	Least Concern	5.00954	5.31757	0.699798	0.725713	0.699798	0.725713	46.4204	0.546122
1.46306	1.61106	0.148007	Puntioplites_falcifer	Cyprinidae	Cypriniformes	potamodromous	Least Concern	1.46306	1.61106	0.165261	0.207113	0.165261	0.207113	50.9331	0.103103
1.96095	2.12109	0.160136	Puntioplites_proctozysron	Cyprinidae	Cypriniformes	potamodromous	Least Concern	1.96095	2.12109	0.292466	0.326558	0.292466	0.326558	46.4475	0.117887
1.7437	1.93545	0.191752	Puntioplites_waandersi	Cyprinidae	Cypriniformes	NA	Least Concern	1.7437	1.93545	0.241472	0.286782	0.241472	0.286782	48.1399	0.108179
0.371171	0.385653	0.0144822	Puntius_brevis	Cyprinidae	Cypriniformes	NA	Least Concern	0.371171	0.385653	-0.430426	-0.413803	-0.430426	-0.413803	31.8708	0.0321278
4.43317	4.43317	1.61385e-08	Puntius_masyai	Cyprinidae	Cypriniformes	NA	NE/DD	4.43317	4.43317	0.646714	0.646714	0.646714	0.646714	3.41826	0.0468255
30.2697	30.2697	-4.25107e-08	Puntius_sophoroides	Cyprinidae	Cypriniformes	NA	NE/DD	30.2697	30.2697	1.48101	1.48101	1.48101	1.48101	-1.4044e-07	-3.51099e-08
71.4116	71.4116	3.47404e-08	Rachycentron_canadum	Rachycentridae	Carangiformes	NA	Least Concern	71.4116	71.4116	1.85377	1.85377	1.85377	1.85377	11.0475	11.0475
0.322711	0.372411	0.0496995	Raiamas_guttatus	Danionidae	Cypriniformes	potamodromous	Least Concern	0.322711	0.372411	-0.491186	-0.428977	-0.491186	-0.428977	49.3021	0.0349412
1.56948	1.58116	0.0116798	Rasbora_amplistriga	Danionidae	Cypriniformes	NA	Least Concern	1.56948	1.58116	0.195756	0.198976	0.195756	0.198976	6.94612	0.103673
11.4075	11.4075	1.5298e-08	Rasbora_argyrotaenia	Danionidae	Cypriniformes	NA	Least Concern	11.4075	11.4075	1.05719	1.05719	1.05719	1.05719	5.67247	0.166837
0.817943	0.878809	0.0608651	Rasbora_atridorsalis	Danionidae	Cypriniformes	NA	Least Concern	0.817943	0.878809	-0.087277	-0.0561055	-0.087277	-0.056106	25.1718	0.0662416
0.726139	0.755165	0.0290255	Rasbora_aurotaenia	Danionidae	Cypriniformes	NA	Least Concern	0.726139	0.755165	-0.13898	-0.121958	-0.13898	-0.121958	26.683	0.0685937
0.262121	0.266923	0.00480116	Rasbora_borapetensis	Danionidae	Cypriniformes	NA	Least Concern	0.262121	0.266923	-0.581498	-0.573614	-0.581498	-0.573614	24.843	0.0169577
0.176421	0.182909	0.00648736	Rasbora_daniconius	Danionidae	Cypriniformes	potamodromous	Least Concern	0.176421	0.182909	-0.75345	-0.737765	-0.75345	-0.737765	32.0122	0.013698
1.0854	1.10058	0.0151833	Rasbora_dusonensis	Danionidae	Cypriniformes	NA	Least Concern	1.0854	1.10058	0.0355882	0.0416212	0.035588	0.041621	24.5943	0.0836539
6.8234	6.8234	3.424e-08	Rasbora_einthovenii	Danionidae	Cypriniformes	NA	Least Concern	6.8234	6.8234	0.834001	0.834001	0.834001	0.834001	0.422785	0.00782934
4.46136	4.46136	4.24824e-08	Rasbora_hobelmani	Danionidae	Cypriniformes	NA	NE/DD	4.46136	4.46136	0.649468	0.649468	0.649468	0.649468	2.9691	0.0511913
10.6858	10.6858	3.41839e-08	Rasbora_myersi	Danionidae	Cypriniformes	NA	Least Concern	10.6858	10.6858	1.02881	1.02881	1.02881	1.02881	7.86413	0.110762
7.99455	7.99455	1.56031e-08	Rasbora_paucisqualis	Danionidae	Cypriniformes	NA	Least Concern	7.99455	7.99455	0.902794	0.902794	0.902794	0.902794	7.71332	0.350606
0.161884	0.169315	0.0074314	Rasbora_paviana	Danionidae	Cypriniformes	NA	Least Concern	0.161884	0.169315	-0.790796	-0.771305	-0.790796	-0.771305	31.7229	0.0127248
1.35837	1.35837	-2.49313e-08	Rasbora_rubrodorsalis	Danionidae	Cypriniformes	NA	Least Concern	1.35837	1.35837	0.133018	0.133018	0.133018	0.133018	9.26906	0.0468134
1.22658	1.25469	0.0281093	Rasbora_septentrionalis	Danionidae	Cypriniformes	NA	NE/DD	1.22658	1.25469	0.0886969	0.0985371	0.088697	0.098537	14.5711	0.0791908
33.7992	36.1322	2.33295	Rasbora_steineri	Danionidae	Cypriniformes	NA	Least Concern	33.7992	36.1322	1.52891	1.55789	1.52891	1.55789	6.45672	3.22836
8.42064	8.42064	-2.72365e-09	Rasbora_sumatrana	Danionidae	Cypriniformes	NA	NE/DD	8.42064	8.42064	0.925345	0.925345	0.925345	0.925345	0.735282	0.0136163
0.239884	0.248575	0.0086906	Rasbora_tornieri	Danionidae	Cypriniformes	non-migratory	Least Concern	0.239884	0.248575	-0.619999	-0.604543	-0.619999	-0.604543	41.4032	0.0198291
0.281396	0.289583	0.0081866	Rasbora_trilineata	Danionidae	Cypriniformes	NA	Least Concern	0.281396	0.289583	-0.550682	-0.538227	-0.550682	-0.538227	43.0365	0.0230883
0.531278	0.532574	0.00129542	Rasbosoma_spilocerca	Danionidae	Cypriniformes	NA	Least Concern	0.531278	0.532574	-0.274678	-0.27362	-0.274678	-0.27362	11.2495	0.0220578
5.10578	5.10578	-2.32753e-08	Redigobius_balteatus	Gobiidae	Gobiiformes	amphidromous	Least Concern	5.11	5.11	0.708421	0.708421	0.708421	0.708421	1.73733	0.0723886
14.2858	14.2858	-2.75292e-09	Redigobius_bikolanus	Gobiidae	Gobiiformes	amphidromous	Least Concern	14.29	14.29	1.15503	1.15503	1.15503	1.15503	-1.79507e-08	-1.49589e-09
5.03499	5.03499	-3.47502e-09	Redigobius_chrysosoma	Gobiidae	Gobiiformes	NA	Least Concern	5.03499	5.03499	0.701999	0.701999	0.701999	0.701999	0.175623	0.0292705
33.3843	33.3843	-8.10516e-09	Redigobius_tambujon	Gobiidae	Gobiiformes	amphidromous	Least Concern	33.38	33.38	1.52349	1.52349	1.52349	1.52349	0.0632087	0.0105348
19.2774	28.2544	8.97699	Rhinogobio_ventralis	Gobionidae	Cypriniformes	NA	NE/DD	19.2774	28.2544	1.28505	1.45109	1.28505	1.45109	51.5177	3.43451
14.3858	15.7054	1.31957	Rhinogobius_albimaculatus	Gobiidae	Gobiiformes	NA	Vulnerable	14.3858	15.7054	1.15793	1.19605	1.15793	1.19605	8.40247	0.336099
4.02748	5.84314	1.81565	Rhinogobius_brunneus	Gobiidae	Gobiiformes	amphidromous	NE/DD	4.03	5.84	0.605305	0.766413	0.605305	0.766413	40.3303	0.391556
9.283	9.88737	0.604372	Rhinogobius_lineatus	Gobiidae	Gobiiformes	NA	Endangered	9.283	9.88737	0.967688	0.995081	0.967688	0.995081	19.9014	0.829225
5.08228	5.42864	0.34636	Rhinogobius_maculicervix	Gobiidae	Gobiiformes	NA	NE/DD	5.08228	5.42864	0.706058	0.734691	0.706058	0.734691	11.4274	0.146505
1.00984	1.07468	0.0648401	Rhinogobius_mekongianus	Gobiidae	Gobiiformes	NA	Least Concern	1.00984	1.07468	0.00425171	0.0312784	0.004252	0.031278	9.31329	0.0517405
6.69584	6.99998	0.304138	Rhinogobius_milleri	Gobiidae	Gobiiformes	NA	NE/DD	6.69584	6.99998	0.825805	0.845096	0.825805	0.845096	6.75497	0.198675
2.47014	2.91819	0.448059	Rhinogobius_similis	Gobiidae	Gobiiformes	NA	NE/DD	2.47014	2.91819	0.392721	0.465114	0.392721	0.465114	20.404	0.113989
3.52125	3.52125	2.85418e-08	Rhinogobius_taenigena	Gobiidae	Gobiiformes	NA	Least Concern	3.52125	3.52125	0.546696	0.546696	0.546696	0.546696	6.82491	0.0974987
9.74898	10.5545	0.805561	Rhodeus_laoensis	Acheilognathidae	Cypriniformes	NA	Vulnerable	9.74898	10.5545	0.988959	1.02344	0.988959	1.02344	25.6513	1.0688
12.5	14.4369	1.9369	Rhodeus_spinalis	Acheilognathidae	Cypriniformes	NA	Least Concern	12.5	14.4369	1.09691	1.15947	1.09691	1.15947	19.3197	0.247688
36.4004	36.4004	-1.98292e-08	Rhyacoschistura_suber	Nemacheilidae	Cypriniformes	NA	NE/DD	36.4004	36.4004	1.56111	1.56111	1.56111	1.56111	3.37245	0.481778
33.4019	33.4019	4.6118e-08	Sardinella_gibbosa	Dorosomatidae	Clupeiformes	NA	Least Concern	33.4019	33.4019	1.52377	1.52377	1.52377	1.52377	1.69134	0.140945
29.4893	29.4893	-3.45433e-08	Saurida_tumbil	Synodontidae	Aulopiformes	amphidromous	Least Concern	29.49	29.49	1.46967	1.46967	1.46968	1.46968	34.395	2.64577
0.818789	1.01916	0.200367	Scaphiodonichthys_acanthopterus	Gobionidae	Cypriniformes	NA	Least Concern	0.818789	1.01916	-0.086828	0.00824067	-0.086828	0.008241	38.7996	0.0894001
48.4996	48.4996	2.60226e-08	Scaphiodonichthys_burmanicus	Cyprinidae	Cypriniformes	NA	Least Concern	48.4996	48.4996	1.68574	1.68574	1.68574	1.68574	38.2642	19.1321
2.33932	2.57745	0.238136	Scaphognathops_bandanensis	Cyprinidae	Cypriniformes	potamodromous	Vulnerable	2.33932	2.57745	0.369089	0.411191	0.369089	0.411191	44.7264	0.178193
2.91707	3.23995	0.322873	Scaphognathops_stejnegeri	Cyprinidae	Cypriniformes	potamodromous	Least Concern	2.91707	3.23995	0.464947	0.510538	0.464947	0.510538	39.8771	0.225294
13.352	16.7001	3.34805	Scaphognathops_theunensis	Cyprinidae	Cypriniformes	NA	Critically Endangered	13.352	16.7001	1.12555	1.22272	1.12555	1.22272	56.2838	3.12688
10.1636	10.1636	3.2249e-08	Scartelaos_histophorus	Gobiidae	Gobiiformes	amphidromous	Least Concern	10.16	10.16	1.00689	1.00689	1.00689	1.00689	0.387733	0.193866
14.4597	14.4597	1.92709e-08	Scatophagus_argus	Scatophagidae	Acanthuriformes	amphidromous	Least Concern	14.46	14.46	1.16017	1.16017	1.16017	1.16017	35.3697	0.707393
3.92025	4.0999	0.179652	Schistura_amplizona	Nemacheilidae	Cypriniformes	NA	NE/DD	3.92025	4.0999	0.593314	0.612774	0.593314	0.612774	9.93703	0.174334
50	50	0	Schistura_aramis	Nemacheilidae	Cypriniformes	NA	NE/DD	50	50	1.69897	1.69897	1.69897	1.69897	0	0
4.26785	4.91556	0.647703	Schistura_athos	Nemacheilidae	Cypriniformes	NA	Least Concern	4.26785	4.91556	0.630209	0.691573	0.630209	0.691573	16.1572	0.323145
14.2952	14.2977	0.00243944	Schistura_atra	Nemacheilidae	Cypriniformes	NA	Vulnerable	14.2952	14.2977	1.15519	1.15526	1.15519	1.15526	0.0897985	0.00690757
4.27624	4.30292	0.0266805	Schistura_bairdi	Nemacheilidae	Cypriniformes	NA	Endangered	4.27624	4.30292	0.631062	0.633763	0.631062	0.633763	0.684806	0.0978294
25	33.279	8.27897	Schistura_bannaensis	Nemacheilidae	Cypriniformes	NA	NE/DD	25	33.279	1.39794	1.52217	1.39794	1.52217	27.0883	13.5442
8.52186	8.55411	0.0322481	Schistura_bolavenensis	Nemacheilidae	Cypriniformes	NA	Endangered	8.52187	8.55411	0.930535	0.932175	0.930535	0.932175	11.3555	0.667972
3.46697	3.48107	0.0140988	Schistura_breviceps	Nemacheilidae	Cypriniformes	NA	NE/DD	3.46697	3.48107	0.53995	0.541713	0.53995	0.541713	24.2896	0.368024
2.14664	2.40877	0.26213	Schistura_bucculenta	Nemacheilidae	Cypriniformes	NA	Least Concern	2.14664	2.40877	0.33176	0.381796	0.33176	0.381796	17.3474	0.112645
50	50	0	Schistura_callichroma	Nemacheilidae	Cypriniformes	NA	NE/DD	50	50	1.69897	1.69897	1.69897	1.69897	0	0
9.74898	10.5545	0.805561	Schistura_cataracta	Nemacheilidae	Cypriniformes	NA	Least Concern	9.74898	10.5545	0.988959	1.02344	0.988959	1.02344	25.6513	1.0688
30.4836	30.4836	2.85785e-09	Schistura_caudofurca	Nemacheilidae	Cypriniformes	NA	Least Concern	30.4836	30.4836	1.48407	1.48407	1.48407	1.48407	6.93449	1.15575
5.17803	5.19534	0.0173157	Schistura_clatrata	Nemacheilidae	Cypriniformes	NA	Least Concern	5.17803	5.19534	0.714164	0.715614	0.714164	0.715614	12.0571	0.502378
20	20	0	Schistura_colossa	Nemacheilidae	Cypriniformes	NA	NE/DD	20	20	1.30103	1.30103	1.30103	1.30103	0.0269264	0.00112193
8.27496	8.44313	0.168171	Schistura_conirostris	Nemacheilidae	Cypriniformes	NA	NE/DD	8.27496	8.44313	0.917766	0.926504	0.917766	0.926504	4.19351	0.0698919
21.6693	23.4122	1.74284	Schistura_coruscans	Nemacheilidae	Cypriniformes	NA	NE/DD	21.6693	23.4122	1.33585	1.36944	1.33584	1.36944	7.44458	3.72229
9.4807	9.49658	0.0158822	Schistura_crabro	Nemacheilidae	Cypriniformes	NA	NE/DD	9.4807	9.49658	0.97684	0.977567	0.97684	0.977567	7.97742	0.36261
34.4315	34.8921	0.460661	Schistura_crassa	Nemacheilidae	Cypriniformes	NA	NE/DD	34.4315	34.8921	1.53696	1.54273	1.53696	1.54273	6.34694	1.05782
50	50	0	Schistura_cryptofasciata	Nemacheilidae	Cypriniformes	NA	NE/DD	50	50	1.69897	1.69897	1.69897	1.69897	1.32647	0.0442156
5.95925	5.99851	0.0392574	Schistura_daubentoni	Nemacheilidae	Cypriniformes	NA	Least Concern	5.95925	5.99851	0.775192	0.778043	0.775192	0.778043	1.12656	0.125173
2.55567	2.60953	0.0538674	Schistura_defectiva	Nemacheilidae	Cypriniformes	NA	NE/DD	2.55567	2.60953	0.407504	0.416563	0.407504	0.416563	5.44781	0.0656363
4.79099	5.06359	0.272601	Schistura_dorsizona	Nemacheilidae	Cypriniformes	NA	Least Concern	4.79099	5.06359	0.680425	0.704459	0.680425	0.704459	14.2772	0.190363
7.83211	8.90482	1.07272	Schistura_ephelis	Nemacheilidae	Cypriniformes	NA	NE/DD	7.83211	8.90483	0.893879	0.949625	0.893879	0.949625	17.509	1.16727
2.17247	2.61998	0.447516	Schistura_fasciolata	Nemacheilidae	Cypriniformes	NA	NE/DD	2.17247	2.61998	0.336953	0.418299	0.336953	0.418299	22.9436	0.109255
5.33763	5.33763	6.3122e-07	Schistura_fusinotata	Nemacheilidae	Cypriniformes	NA	Least Concern	5.33763	5.33763	0.727348	0.727348	0.727348	0.727348	5.53317	0.307398
11.541	11.5443	0.00329154	Schistura_globiceps	Nemacheilidae	Cypriniformes	NA	NE/DD	11.541	11.5443	1.06224	1.06237	1.06224	1.06237	3.16851	0.150882
4.32584	4.35302	0.0271804	Schistura_imitator	Nemacheilidae	Cypriniformes	NA	Least Concern	4.32584	4.35302	0.636071	0.638791	0.636071	0.638791	7.90431	0.272562
14.1739	14.3353	0.161353	Schistura_irregularis	Nemacheilidae	Cypriniformes	NA	NE/DD	14.1739	14.3353	1.15149	1.15641	1.15149	1.15641	6.58993	0.941419
1.08775	1.08968	0.00193077	Schistura_isostigma	Nemacheilidae	Cypriniformes	NA	Least Concern	1.08775	1.08968	0.0365275	0.0372978	0.036527	0.037298	9.88715	0.0578196
9.46814	9.46814	-2.82812e-08	Schistura_kaysonei	Nemacheilidae	Cypriniformes	NA	Vulnerable	9.46814	9.46814	0.976265	0.976265	0.976265	0.976265	3.0972	0.30972
0.623261	0.670568	0.0473065	Schistura_kengtungensis	Nemacheilidae	Cypriniformes	NA	Least Concern	0.623261	0.670568	-0.20533	-0.173557	-0.20533	-0.173557	26.1904	0.0543369
2.91484	2.96802	0.0531795	Schistura_khamtanhi	Nemacheilidae	Cypriniformes	NA	NE/DD	2.91484	2.96802	0.464614	0.472466	0.464614	0.472466	10.0191	0.270788
22.0613	23.1238	1.06252	Schistura_khugae	Nemacheilidae	Cypriniformes	NA	Vulnerable	22.0613	23.1238	1.34363	1.36406	1.34363	1.36406	6.3768	0.5314
5.8853	6.19377	0.308475	Schistura_kloetzliae	Nemacheilidae	Cypriniformes	NA	NE/DD	5.8853	6.19377	0.769768	0.791955	0.769768	0.791955	9.05432	0.274373
33.3333	33.3333	3.33333e-08	Schistura_kohchangensis	Nemacheilidae	Cypriniformes	NA	NE/DD	33.3333	33.3333	1.52288	1.52288	1.52288	1.52288	0.00355583	0.000296319
3.22676	3.35228	0.12552	Schistura_kongphengi	Nemacheilidae	Cypriniformes	NA	Least Concern	3.22676	3.35228	0.508767	0.52534	0.508767	0.52534	15.0517	0.228056
4.63433	5.62112	0.986794	Schistura_kontumensis	Nemacheilidae	Cypriniformes	NA	Vulnerable	4.63432	5.62112	0.665986	0.749823	0.665986	0.749823	24.8211	0.295489
9.06055	9.06055	-1.38434e-08	Schistura_latidens	Nemacheilidae	Cypriniformes	NA	NE/DD	9.06055	9.06055	0.957155	0.957155	0.957155	0.957155	2.98012	0.0726857
2.28002	2.72312	0.443106	Schistura_latifasciata	Nemacheilidae	Cypriniformes	NA	NE/DD	2.28002	2.72312	0.357938	0.435067	0.357938	0.435067	19.9443	0.212173
9.42728	11.0272	1.59989	Schistura_macrocephalus	Nemacheilidae	Cypriniformes	NA	NE/DD	9.42728	11.0272	0.974386	1.04246	0.974386	1.04246	26.5528	0.885093
2.26369	2.273	0.00930124	Schistura_magnifluvis	Nemacheilidae	Cypriniformes	NA	Least Concern	2.26369	2.273	0.354818	0.356599	0.354818	0.356599	12.3497	0.26276
2.22935	2.47522	0.245872	Schistura_melarancia	Nemacheilidae	Cypriniformes	NA	Least Concern	2.22935	2.47522	0.348178	0.393614	0.348178	0.393614	21.7615	0.241795
4.80536	4.82032	0.0149589	Schistura_menanensis	Nemacheilidae	Cypriniformes	NA	NE/DD	4.80536	4.82032	0.681726	0.683076	0.681726	0.683076	13.5233	0.250432
34.945	34.945	-1.15381e-08	Schistura_musa	Nemacheilidae	Cypriniformes	NA	NE/DD	34.945	34.945	1.54338	1.54338	1.54339	1.54339	1.91296	0.95648
2.38136	2.5185	0.137145	Schistura_namboensis	Nemacheilidae	Cypriniformes	NA	Least Concern	2.38136	2.5185	0.376825	0.401143	0.376825	0.401143	16.795	0.190853
0.282967	0.290483	0.0075162	Schistura_nicholsi	Nemacheilidae	Cypriniformes	NA	Least Concern	0.282967	0.290483	-0.548264	-0.536879	-0.548264	-0.536879	28.1103	0.0162581
2.66045	2.66172	0.00127347	Schistura_nomi	Nemacheilidae	Cypriniformes	NA	Least Concern	2.66045	2.66172	0.424955	0.425163	0.424955	0.425163	5.49009	0.161473
11.7638	11.7818	0.017915	Schistura_novemradiata	Nemacheilidae	Cypriniformes	NA	NE/DD	11.7638	11.7818	1.07055	1.07121	1.07055	1.07121	5.83003	0.277621
3.44379	3.58646	0.142664	Schistura_nudidorsum	Nemacheilidae	Cypriniformes	NA	Endangered	3.4438	3.58646	0.537037	0.554666	0.537037	0.554666	17.2197	0.313085
14.3784	14.4097	0.0312276	Schistura_obeini	Nemacheilidae	Cypriniformes	NA	Least Concern	14.3784	14.4097	1.15771	1.15865	1.15771	1.15865	1.14203	0.0951689
25.3065	29.2279	3.9214	Schistura_personata	Nemacheilidae	Cypriniformes	NA	Near Threatened	25.3065	29.2279	1.40323	1.4658	1.40323	1.4658	13.4173	6.70865
10.4685	11.1321	0.663605	Schistura_pertica	Nemacheilidae	Cypriniformes	NA	NE/DD	10.4685	11.1321	1.01989	1.04658	1.01989	1.04658	11.7165	0.300424
1.09076	1.20204	0.111275	Schistura_poculi	Nemacheilidae	Cypriniformes	NA	Least Concern	1.09076	1.20204	0.0377304	0.0799182	0.03773	0.079918	23.4783	0.122923
1.34345	1.565	0.221544	Schistura_porthos	Nemacheilidae	Cypriniformes	NA	Least Concern	1.34345	1.565	0.128222	0.194513	0.128222	0.194513	30.7029	0.155065
3.73412	4.3716	0.637476	Schistura_procera	Nemacheilidae	Cypriniformes	NA	Least Concern	3.73412	4.3716	0.572188	0.64064	0.572188	0.64064	32.0737	0.593957
20.6051	20.6051	4.90593e-09	Schistura_punctifasciata	Nemacheilidae	Cypriniformes	NA	NE/DD	20.6051	20.6051	1.31397	1.31397	1.31397	1.31397	2.08686	0.160527
63.7049	63.7049	-4.09358e-08	Schistura_rikiki	Nemacheilidae	Cypriniformes	NA	NE/DD	63.7049	63.7049	1.80417	1.80417	1.80417	1.80417	-6.42585e-08	0
11.7638	11.7818	0.017915	Schistura_russa	Nemacheilidae	Cypriniformes	NA	NE/DD	11.7638	11.7818	1.07055	1.07121	1.07055	1.07121	5.83003	0.277621
1.72328	1.77086	0.0475813	Schistura_schultzi	Nemacheilidae	Cypriniformes	NA	NE/DD	1.72328	1.77086	0.236356	0.248185	0.236356	0.248185	33.7645	0.170528
31.685	32.6098	0.924843	Schistura_sertata	Nemacheilidae	Cypriniformes	NA	NE/DD	31.685	32.6098	1.50085	1.51335	1.50085	1.51335	12.3717	6.18587
2.86914	2.91154	0.0424003	Schistura_sexcauda	Nemacheilidae	Cypriniformes	NA	Least Concern	2.86914	2.91154	0.457751	0.464122	0.457751	0.464122	32.8222	0.24134
50	50	0	Schistura_sexnubes	Nemacheilidae	Cypriniformes	NA	NE/DD	50	50	1.69897	1.69897	1.69897	1.69897	0.0561073	0.00187024
8.42501	9.21417	0.789166	Schistura_sigillata	Nemacheilidae	Cypriniformes	NA	NE/DD	8.42501	9.21417	0.92557	0.964456	0.92557	0.964456	12.257	0.875498
25	25	0	Schistura_sokolovi	Nemacheilidae	Cypriniformes	NA	NE/DD	25	25	1.39794	1.39794	1.39794	1.39794	0.712974	0.0594145
1.56246	1.70717	0.144714	Schistura_sombooni	Nemacheilidae	Cypriniformes	NA	Least Concern	1.56245	1.70717	0.193808	0.232277	0.193808	0.232277	22.3092	0.151763
13.4138	13.6693	0.255446	Schistura_spiloptera	Nemacheilidae	Cypriniformes	NA	Critically Endangered	13.4138	13.6693	1.12755	1.13574	1.12755	1.13575	1.87038	0.374075
15.6775	15.6775	2.54234e-08	Schistura_tizardi	Nemacheilidae	Cypriniformes	NA	NE/DD	15.6775	15.6775	1.19528	1.19528	1.19528	1.19528	0.0065052	0.0005004
20	20.0119	0.0118712	Schistura_tubulinaris	Nemacheilidae	Cypriniformes	NA	Vulnerable	20	20.0119	1.30103	1.30129	1.30103	1.30129	0.133506	0.0111255
3.89499	3.89499	-4.18871e-08	Schistura_vinciguerrae	Nemacheilidae	Cypriniformes	NA	Least Concern	3.89499	3.89499	0.590507	0.590507	0.590507	0.590507	12.9894	0.127347
50	50	0	Schistura_waltoni	Nemacheilidae	Cypriniformes	NA	NE/DD	50	50	1.69897	1.69897	1.69897	1.69897	1.98952e-13	4.32504e-15
11.5032	11.5656	0.0624826	Schistura_xhatensis	Nemacheilidae	Cypriniformes	NA	NE/DD	11.5032	11.5656	1.06082	1.06317	1.06082	1.06317	3.4325	0.490357
4.80293	5.5517	0.748771	Schistura_yersini	Nemacheilidae	Cypriniformes	NA	NE/DD	4.80293	5.5517	0.681506	0.744426	0.681506	0.744426	26.4292	0.695505
4.92156	5.54408	0.622524	Schizopygopsis_anteroventris	Cyprinidae	Cypriniformes	NA	NE/DD	4.92156	5.54408	0.692103	0.74383	0.692103	0.74383	28.1966	0.273753
19.8795	24.8886	5.00911	Schizopygopsis_firmispinata	Cyprinidae	Cypriniformes	NA	NE/DD	19.8794	24.8886	1.2984	1.396	1.2984	1.396	25.0996	1.32103
17.4663	32.0215	14.5552	Schizopygopsis_potanini	Cyprinidae	Cypriniformes	NA	NE/DD	17.4663	32.0215	1.2422	1.50544	1.2422	1.50544	57.5651	3.19806
20.1377	20.1735	0.035784	Schizopygopsis_thermalis	Cyprinidae	Cypriniformes	NA	NE/DD	20.1377	20.1735	1.30401	1.30478	1.30401	1.30478	0.177381	0.177381
5.19968	10.3589	5.15926	Schizothorax_dolichonema	Cyprinidae	Cypriniformes	NA	NE/DD	5.19968	10.3589	0.715977	1.01532	0.715977	1.01531	64.903	0.690458
1.58271	1.7558	0.173095	Schizothorax_griseus	Cyprinidae	Cypriniformes	NA	Least Concern	1.58271	1.75581	0.199401	0.244476	0.199401	0.244476	25.077	0.0803749
1.83713	2.45708	0.619954	Schizothorax_lantsangensis	Cyprinidae	Cypriniformes	NA	NE/DD	1.83713	2.45708	0.264139	0.39042	0.264139	0.39042	42.058	0.0991933
1.96114	2.34483	0.383686	Schizothorax_lissolabiatus	Cyprinidae	Cypriniformes	NA	Least Concern	1.96114	2.34483	0.292509	0.370111	0.292509	0.370111	26.3578	0.0918389
4.62734	6.38626	1.75892	Schizothorax_nudiventris	Cyprinidae	Cypriniformes	NA	NE/DD	4.62734	6.38626	0.665331	0.805247	0.665331	0.805247	30.5135	0.238387
36.1074	36.1074	-3.10187e-08	Schizothorax_oconnori	Cyprinidae	Cypriniformes	NA	Least Concern	36.1074	36.1074	1.5576	1.5576	1.5576	1.5576	4.38596	1.09649
50	50	0	Schizothorax_taliensis	Cyprinidae	Cypriniformes	NA	NE/DD	50	50	1.69897	1.69897	1.69897	1.69897	2.7099	0.142626
36.1074	36.1074	-3.10187e-08	Schizothorax_waltoni	Cyprinidae	Cypriniformes	NA	Least Concern	36.1074	36.1074	1.5576	1.5576	1.5576	1.5576	4.38596	1.09649
5.06882	6.97024	1.90142	Schizothorax_yunnanensis	Cyprinidae	Cypriniformes	NA	NE/DD	5.06882	6.97024	0.704907	0.843248	0.704907	0.843248	33.5326	0.236145
3.40778	3.43599	0.028218	Scleropages_formosus	Osteoglossidae	Osteoglossiformes	NA	Endangered	3.40778	3.43599	0.532471	0.536052	0.532471	0.536052	51.9321	0.182218
21.4284	21.4284	4.09027e-08	Scomberoides_lysan	Carangidae	Carangiformes	NA	Least Concern	21.4284	21.4284	1.33099	1.33099	1.33099	1.33099	48.8492	2.22042
5.98438	6.13469	0.150309	Scomberomorus_sinensis	Scombridae	Scombriformes	amphidromous	NE/DD	5.98	6.13	0.776701	0.78746	0.776701	0.78746	34.298	0.445429
6.49755	6.75181	0.254259	Sectoria_heterognathos	Nemacheilidae	Cypriniformes	NA	NE/DD	6.49755	6.75181	0.81275	0.82942	0.81275	0.82942	14.2638	0.182869
11.0719	11.0719	1.29688e-08	Selaroides_leptolepis	Carangidae	Carangiformes	amphidromous	Least Concern	11.07	11.07	1.04415	1.04415	1.04415	1.04415	12.2322	0.556007
0.993009	1.03886	0.0458488	Serpenticobitis_cingulata	Serpenticobitidae	Cypriniformes	NA	Vulnerable	0.993009	1.03886	-0.00304682	0.0165562	-0.003047	0.016556	18.3348	0.0742301
5.39414	5.40739	0.0132516	Serpenticobitis_octozona	Serpenticobitidae	Cypriniformes	NA	NE/DD	5.39414	5.40739	0.731922	0.732988	0.731922	0.732988	4.99955	0.19229
0.456259	0.458178	0.0019189	Serpenticobitis_zonata	Serpenticobitidae	Cypriniformes	NA	NE/DD	0.456259	0.458178	-0.340789	-0.338966	-0.340789	-0.338966	22.1403	0.0219428
1.67741	1.68274	0.00532975	Setipinna_melanochir	Engraulidae	Clupeiformes	NA	NE/DD	1.67741	1.68274	0.22464	0.226018	0.22464	0.226018	59.4568	0.103764
14.527	14.527	3.32904e-08	Setipinna_taty	Engraulidae	Clupeiformes	NA	Least Concern	14.527	14.527	1.16218	1.16218	1.16218	1.16218	3.86696	0.175771
10	15.1868	5.18685	Sewellia_breviventralis	Gastromyzontidae	Cypriniformes	NA	Critically Endangered	10	15.1868	1	1.18147	1	1.18147	44.3648	1.23236
4.01999	4.01999	3.48258e-07	Sewellia_diardi	Gastromyzontidae	Cypriniformes	NA	NE/DD	4.01999	4.01999	0.604225	0.604225	0.604225	0.604225	3.03673	0.138033
4.70889	4.72088	0.0119926	Sewellia_elongata	Gastromyzontidae	Cypriniformes	NA	Near Threatened	4.70889	4.72088	0.672919	0.674023	0.672919	0.674023	3.03003	0.178237
25	25.1909	0.19091	Sewellia_patella	Gastromyzontidae	Cypriniformes	NA	Endangered	25	25.1909	1.39794	1.40124	1.39794	1.40124	2.21578	0.0852224
2.73098	2.73226	0.00127347	Sewellia_speciosa	Gastromyzontidae	Cypriniformes	NA	Least Concern	2.73098	2.73226	0.436319	0.436522	0.436319	0.436522	5.28406	0.155413
15.4092	15.4092	-2.91728e-08	Siganus_fuscescens	Siganidae	Acanthuriformes	NA	Least Concern	15.4092	15.4092	1.18778	1.18778	1.18778	1.18778	1.78066	0.296776
1.92114	2.07149	0.150356	Sikukia_flavicaudata	Cyprinidae	Cypriniformes	NA	NE/DD	1.92114	2.07149	0.283558	0.316283	0.283558	0.316283	29.3489	0.125423
1.52747	1.62221	0.0947361	Sikukia_gudgeri	Cyprinidae	Cypriniformes	potamodromous	NE/DD	1.52747	1.62221	0.183974	0.210107	0.183974	0.210107	22.3212	0.151845
13.4052	16.2308	2.82559	Sikukia_longibarbata	Cyprinidae	Cypriniformes	NA	NE/DD	13.4052	16.2308	1.12727	1.21034	1.12727	1.21034	26.6786	1.77857
1.00778	1.01319	0.0054017	Sikukia_stejnegeri	Cyprinidae	Cypriniformes	potamodromous	Least Concern	1.00778	1.01319	0.00336746	0.00568918	0.003367	0.005689	12.9206	0.0624184
11.3354	11.3354	-1.9466e-08	Sillago_sihama	Sillaginidae	Acanthuriformes	amphidromous	Least Concern	11.34	11.34	1.05461	1.05461	1.05461	1.05461	19.9761	0.908004
3.38078	3.51823	0.137452	Sineuchiloglanis_gracilicaudata	Sisoridae	Siluriformes	NA	NE/DD	3.38078	3.51823	0.529016	0.546324	0.529016	0.546324	5.951	0.0541
8.61354	9.50357	0.890029	Sineuchiloglanis_myzostoma	Sisoridae	Siluriformes	NA	NE/DD	8.61354	9.50357	0.935182	0.977887	0.935182	0.977887	9.48513	0.237128
20	23.2982	3.29819	Sineuchiloglanis_prolixdorsalis	Sisoridae	Siluriformes	NA	NE/DD	20	23.2982	1.30103	1.36732	1.30103	1.36732	14.1564	2.02234
0.558532	0.626906	0.0683736	Sinibotia_longiventralis	Botiidae	Cypriniformes	NA	NE/DD	0.558532	0.626906	-0.252952	-0.202798	-0.252952	-0.202798	31.5997	0.0423021
2.34871	3.34253	0.99382	Sinibotia_superciliaris	Botiidae	Cypriniformes	NA	NE/DD	2.34871	3.34253	0.37083	0.524076	0.37083	0.524076	44.5881	0.168894
31.9655	38.29	6.32452	Sinibrama_affinis	Xenocyprididae	Cypriniformes	NA	Least Concern	31.9655	38.29	1.50468	1.58309	1.50468	1.58309	19.0709	9.53543
35.3801	35.3801	5.92499e-09	Sinibrama_melrosei	Xenocyprididae	Cypriniformes	NA	NE/DD	35.3801	35.3801	1.54876	1.54876	1.54876	1.54876	3.19057	0.455796
15.0119	15.0119	-1.4815e-09	Speolabeo_musaei	Cyprinidae	Cypriniformes	NA	Vulnerable	15.0119	15.0119	1.17643	1.17643	1.17643	1.17643	0.226617	0.0323739
22.3672	22.3672	4.68501e-08	Sphyraena_jello	Sphyraenidae	Carangiformes	NA	Least Concern	22.3672	22.3672	1.34961	1.34961	1.34961	1.34961	46.3767	2.10803
34.6739	34.6739	-4.42773e-09	Sphyraena_obtusata	Sphyraenidae	Carangiformes	NA	Least Concern	34.6739	34.6739	1.54	1.54	1.54	1.54	-1.27695e-08	0
14.2073	14.2582	0.050832	Spinibarbus_caldwelli	Cyprinidae	Cypriniformes	NA	NE/DD	14.2073	14.2582	1.15251	1.15406	1.15251	1.15406	6.9796	0.0802253
41.727	41.727	-4.37011e-09	Squalidus_atromaculatus	Gobionidae	Cypriniformes	NA	Least Concern	41.727	41.727	1.62042	1.62042	1.62042	1.62042	0.0283217	0.00472029
59.1089	59.1089	1.96038e-08	Stenogobius_genivittatus	Gobiidae	Gobiiformes	amphidromous	Least Concern	59.11	59.11	1.77166	1.77166	1.77166	1.77166	3.31655e-08	0
54.3638	54.3638	2.04296e-08	Stenogobius_gymnopomus	Gobiidae	Gobiiformes	amphidromous	NE/DD	54.36	54.36	1.73528	1.73528	1.73528	1.73528	3.75794e-08	0
3.34183	3.34183	-2.8068e-08	Stenogobius_mekongensis	Gobiidae	Gobiiformes	NA	Least Concern	3.34183	3.34183	0.523984	0.523984	0.523984	0.523984	6.91941	0.172985
1.90028	2.18414	0.283862	Stenogobius_ophthalmoporus	Gobiidae	Gobiiformes	NA	Least Concern	1.90028	2.18414	0.278817	0.33928	0.278817	0.33928	33.9047	0.201814
9.22937	9.22937	4.06491e-08	Stigmatogobius_pleurostigma	Gobiidae	Gobiiformes	NA	NE/DD	9.22937	9.22937	0.965172	0.965172	0.965172	0.965172	0.175045	0.0159132
14.527	14.527	3.32904e-08	Stigmatogobius_sadanundio	Gobiidae	Gobiiformes	amphidromous	NE/DD	14.53	14.53	1.16227	1.16227	1.16227	1.16227	3.86696	0.175771
50	50	-3.86634e-08	Stolephorus_baganensis	Engraulidae	Clupeiformes	amphidromous	Least Concern	50	50	1.69897	1.69897	1.69897	1.69897	0.00187547	0.000208386
33.3398	33.3398	3.69822e-08	Stolephorus_commersonnii	Engraulidae	Clupeiformes	anadromous	Least Concern	33.3398	33.3398	1.52296	1.52296	1.52296	1.52296	1.10925e-07	0
11.8624	11.8624	-3.40379e-08	Stolephorus_dubiosus	Engraulidae	Clupeiformes	amphidromous	Least Concern	11.86	11.86	1.07408	1.07408	1.07408	1.07408	2.2636e-07	5.65901e-08
15.9381	15.9381	2.18067e-08	Stolephorus_indicus	Engraulidae	Clupeiformes	NA	NE/DD	15.9381	15.9381	1.20244	1.20244	1.20243	1.20243	12.4068	0.954365
16.0539	16.0539	3.21417e-08	Strongylura_leiurus	Belonidae	Beloniformes	NA	NE/DD	16.0539	16.0539	1.20558	1.20558	1.20558	1.20558	21.3708	0.971399
6.0972	6.0972	4.16873e-09	Strongylura_strongylura	Belonidae	Beloniformes	NA	Least Concern	6.0972	6.0972	0.78513	0.78513	0.78513	0.78513	10.8468	0.374026
0.313237	0.31695	0.00371304	Sundasalanx_mekongensis	Ehiravidae	Clupeiformes	NA	Least Concern	0.313237	0.31695	-0.504127	-0.499009	-0.504127	-0.499009	18.2702	0.0195403
0.712589	0.714329	0.00174022	Sundasalanx_praecox	Ehiravidae	Clupeiformes	NA	Least Concern	0.712589	0.714329	-0.147161	-0.146102	-0.147161	-0.146102	7.5409	0.0355703
1.52921	1.63055	0.101346	Syncrossus_beauforti	Botiidae	Cypriniformes	NA	Near Threatened	1.5292	1.63055	0.184466	0.212334	0.184466	0.212334	21.9954	0.140996
0.601011	0.628385	0.0273745	Syncrossus_helodes	Botiidae	Cypriniformes	potamodromous	Least Concern	0.601011	0.628385	-0.221118	-0.201774	-0.221118	-0.201774	41.2928	0.0623758
0.315252	0.356434	0.0411823	Syncrossus_hymenophysa	Botiidae	Cypriniformes	NA	Least Concern	0.315252	0.356434	-0.501342	-0.448021	-0.501342	-0.448021	61.7795	0.0302248
9.82692	10.5688	0.741867	Systomus_jacobusboehlkei	Cyprinidae	Cypriniformes	NA	Least Concern	9.82692	10.5688	0.992418	1.02403	0.992418	1.02402	10.458	0.3486
0.550838	0.563678	0.0128396	Systomus_orphoides	Cyprinidae	Cypriniformes	NA	NE/DD	0.550838	0.563678	-0.258976	-0.248969	-0.258976	-0.248969	20.4934	0.0388868
5.85841	5.85841	1.87195e-09	Taenioides_cirratus	Gobiidae	Gobiiformes	amphidromous	NE/DD	5.86	5.86	0.767898	0.767898	0.767898	0.767898	7.03591	0.23453
14.5213	14.5213	-3.8524e-09	Taenioides_gracilis	Gobiidae	Gobiiformes	NA	Least Concern	14.5213	14.5213	1.162	1.162	1.162	1.162	0.000365154	0.000365154
6.83566	6.83566	4.07481e-08	Taenioides_nigrimarginatus	Gobiidae	Gobiiformes	NA	NE/DD	6.83566	6.83566	0.834781	0.834781	0.834781	0.834781	3.34358	0.145373
16.382	16.382	2.53527e-08	Telatrygon_zugei	Dasyatidae	Myliobatiformes	amphidromous	Vulnerable	16.38	16.38	1.21431	1.21431	1.21431	1.21431	33.2265	1.51029
30.9284	30.9284	-1.29405e-08	Tenualosa_reevesii	Dorosomatidae	Clupeiformes	anadromous	NE/DD	30.9284	30.9284	1.49036	1.49036	1.49036	1.49036	10.7162	10.7162
1.55271	1.57296	0.0202515	Tenualosa_thibaudeaui	Dorosomatidae	Clupeiformes	potamodromous	Vulnerable	1.55271	1.57296	0.191089	0.196717	0.191089	0.196717	28.9528	0.103035
5.09335	5.09335	-1.76674e-08	Tenualosa_toli	Dorosomatidae	Clupeiformes	anadromous	Vulnerable	5.09335	5.09335	0.707003	0.707003	0.707003	0.707003	4.78705	0.217593
9.14723	9.14723	4.16645e-08	Terapon_jarbua	Terapontidae	Centrarchiformes	catadromous	Least Concern	9.14723	9.14723	0.961289	0.961289	0.961289	0.961289	16.8308	0.731772
7.25121	7.25121	-1.53306e-08	Terapon_theraps	Terapontidae	Centrarchiformes	NA	Least Concern	7.25121	7.25121	0.860411	0.860411	0.860411	0.860411	19.9369	0.511202
7.51487	7.5638	0.0489205	Terateleotris_aspro	Odontobutidae	Gobiiformes	NA	Endangered	7.51487	7.56379	0.875922	0.87874	0.875922	0.87874	2.14602	0.238447
0.790907	0.79383	0.00292283	Thryssocypris_tonlesapensis	Danionidae	Cypriniformes	NA	Least Concern	0.790907	0.79383	-0.101875	-0.100272	-0.101875	-0.100272	7.52559	0.0473307
0.339579	0.354241	0.0146616	Thynnichthys_thynnoides	Cyprinidae	Cypriniformes	potamodromous	Least Concern	0.339579	0.354241	-0.469059	-0.450701	-0.469059	-0.450701	33.9362	0.0297947
2.2681	2.2681	-4.30825e-08	Tonlesapia_tsukawakii	Callionymidae	Syngnathiformes	NA	NE/DD	2.2681	2.2681	0.355662	0.355662	0.355662	0.355662	3.76734	0.0876127
12.9613	13.9428	0.981577	Tor_ater	Cyprinidae	Cypriniformes	NA	Near Threatened	12.9613	13.9428	1.11265	1.14435	1.11265	1.14435	12.4504	1.13185
1.01341	1.39137	0.377958	Tor_laterivittatus	Cyprinidae	Cypriniformes	NA	NE/DD	1.01341	1.39137	0.00578519	0.143442	0.005785	0.143442	62.5709	0.109009
20.7689	23.3223	2.55343	Tor_mekongensis	Cyprinidae	Cypriniformes	NA	NE/DD	20.7689	23.3223	1.31741	1.36777	1.31741	1.36777	23.7613	1.48508
2.08313	2.35052	0.267388	Tor_polylepis	Cyprinidae	Cypriniformes	NA	NE/DD	2.08313	2.35052	0.318717	0.371164	0.318717	0.371164	22.0197	0.123015
0.638934	0.892327	0.253392	Tor_sinensis	Cyprinidae	Cypriniformes	potamodromous	Vulnerable	0.638934	0.892327	-0.194544	-0.049476	-0.194544	-0.049476	66.0944	0.0679285
0.335753	0.413689	0.0779359	Tor_tambra	Cyprinidae	Cypriniformes	NA	NE/DD	0.335753	0.413689	-0.47398	-0.383326	-0.47398	-0.383326	73.9098	0.0263775
0.336915	0.414931	0.0780162	Tor_tambroides	Cyprinidae	Cypriniformes	NA	NE/DD	0.336915	0.414931	-0.47248	-0.382024	-0.47248	-0.382024	73.9136	0.0265685
6.94268	9.54412	2.60145	Toxabramis_houdemeri	Xenocyprididae	Cypriniformes	NA	Least Concern	6.94268	9.54412	0.841527	0.979736	0.841527	0.979736	41.5218	1.06466
3.94651	5.1189	1.17239	Toxabramis_maensis	Xenocyprididae	Cypriniformes	NA	NE/DD	3.94651	5.1189	0.596213	0.709177	0.596213	0.709177	50.8247	0.571063
2.79653	2.87476	0.0782317	Toxotes_chatareus	Toxotidae	Carangiformes	amphidromous	Least Concern	2.8	2.87	0.447158	0.457882	0.447158	0.457882	20.5587	0.321229
23.1508	23.1508	8.53962e-10	Toxotes_jaculatrix	Toxotidae	Carangiformes	amphidromous	Least Concern	23.15	23.15	1.36455	1.36455	1.36455	1.36455	1.84536	0.263623
0.215519	0.229895	0.0143754	Toxotes_microlepis	Toxotidae	Carangiformes	potamodromous	Least Concern	0.215519	0.229895	-0.666514	-0.63847	-0.666514	-0.63847	41.4058	0.0206926
16.6667	19.4712	2.80456	Tremeuchiloglanis_abbreviata	Sisoridae	Siluriformes	NA	NE/DD	16.6667	19.4712	1.22185	1.28939	1.22185	1.28939	14.8753	0.991686
35.6294	35.6294	-2.43973e-09	Trichiurus_lepturus	Trichiuridae	Scombriformes	amphidromous	Least Concern	35.63	35.63	1.55182	1.55182	1.55182	1.55182	42.9767	3.58139
0.721891	0.732258	0.0103672	Trichopodus_microlepis	Osphronemidae	Anabantiformes	NA	Least Concern	0.721891	0.732258	-0.141528	-0.135336	-0.141528	-0.135336	26.5541	0.0532146
0.432349	0.444596	0.0122467	Trichopodus_pectoralis	Osphronemidae	Anabantiformes	potamodromous	Least Concern	0.432349	0.444596	-0.364166	-0.352034	-0.364166	-0.352034	33.9806	0.0402614
0.228398	0.239138	0.0107399	Trichopodus_trichopterus	Osphronemidae	Anabantiformes	potamodromous	Least Concern	0.228398	0.239138	-0.641308	-0.621351	-0.641308	-0.621351	43.026	0.0194688
0.239402	0.243379	0.00397641	Trichopsis_pumila	Osphronemidae	Anabantiformes	NA	Least Concern	0.239402	0.243379	-0.620872	-0.613717	-0.620872	-0.613717	14.977	0.0118771
0.264866	0.270103	0.00523684	Trichopsis_schalleri	Osphronemidae	Anabantiformes	NA	Least Concern	0.264866	0.270103	-0.576974	-0.568471	-0.576974	-0.568471	20.9663	0.0155883
0.215784	0.219322	0.00353815	Trichopsis_vittata	Osphronemidae	Anabantiformes	NA	Least Concern	0.215784	0.219322	-0.665981	-0.658918	-0.665981	-0.658918	25.887	0.0135463
27.2587	27.2587	1.02589e-08	Trigonopoma_pauciperforatum	Danionidae	Cypriniformes	NA	Least Concern	27.2587	27.2587	1.4355	1.4355	1.43551	1.43551	3.76354e-08	0
2.41835	2.67379	0.255436	Triplophysa_brevicauda	Nemacheilidae	Cypriniformes	NA	NE/DD	2.41835	2.67379	0.383519	0.427127	0.383519	0.427127	11.7019	0.130021
20	23.1196	3.11955	Triplophysa_jianchuanensis	Nemacheilidae	Cypriniformes	NA	NE/DD	20	23.1196	1.30103	1.36398	1.30103	1.36398	13.4941	0.346002
1.28491	1.32632	0.0414107	Triplophysa_microps	Nemacheilidae	Cypriniformes	NA	Least Concern	1.28491	1.32632	0.108873	0.122649	0.108873	0.122649	8.13217	0.0707145
2.89324	3.25877	0.365532	Triplophysa_stenura	Nemacheilidae	Cypriniformes	NA	Least Concern	2.89324	3.25877	0.461385	0.513054	0.461385	0.513054	17.6074	0.123996
1.50519	1.56736	0.0621706	Triplophysa_stolickai	Nemacheilidae	Cypriniformes	NA	Least Concern	1.50519	1.56736	0.177591	0.195169	0.177591	0.195169	13.5955	0.0763791
33.9458	33.9458	1.92576e-08	Troglocyclocheilus_khammouanensis	Cyprinidae	Cypriniformes	NA	Vulnerable	33.9458	33.9458	1.53079	1.53079	1.53079	1.53079	5.67304e-08	0
7.11012	7.11012	3.79505e-08	Trypauchen_vagina	Gobiidae	Gobiiformes	amphidromous	Least Concern	7.11	7.11	0.85187	0.85187	0.85187	0.85187	6.58578	0.286338
11.6786	11.6786	-5.82904e-09	Trypauchenopsis_intermedia	Gobiidae	Gobiiformes	NA	Least Concern	11.6786	11.6786	1.06739	1.06739	1.06739	1.06739	0.000278082	0.000278082
4.05446	4.05446	3.08396e-08	Tuberoschistura_cambodgiensis	Nemacheilidae	Cypriniformes	NA	Least Concern	4.05446	4.05446	0.607933	0.607933	0.607933	0.607933	6.64858	0.174963
3.26387	3.26387	-2.54064e-08	Typhlachirus_elongatus	Soleidae	Carangiformes	NA	Least Concern	3.26387	3.26387	0.513732	0.513732	0.513732	0.513732	3.73238	0.109776
58.1893	58.1893	1.01302e-08	Urogymnus_polylepis	Dasyatidae	Myliobatiformes	potamodromous	Endangered	58.1893	58.1893	1.76484	1.76484	1.76484	1.76484	1.74091e-08	0
10.3546	11.237	0.882408	Vanmanenia_microcephala	Gastromyzontidae	Cypriniformes	NA	NE/DD	10.3546	11.237	1.01513	1.05065	1.01513	1.05065	9.60371	0.165581
2.00224	2.13476	0.132522	Vanmanenia_serrilineata	Gastromyzontidae	Cypriniformes	NA	NE/DD	2.00224	2.13476	0.301517	0.32935	0.301517	0.32935	8.62333	0.113465
1.94042	2.29874	0.358318	Vanmanenia_striata	Gastromyzontidae	Cypriniformes	NA	NE/DD	1.94042	2.29874	0.287896	0.361489	0.287896	0.361489	22.6862	0.0969495
1.54091	1.79156	0.250648	Vanmanenia_tetraloba	Gastromyzontidae	Cypriniformes	NA	NE/DD	1.54091	1.79156	0.187777	0.25323	0.187777	0.25323	22.2425	0.063369
0.37834	0.458563	0.0802232	Wallago_attu	Siluridae	Siluriformes	potamodromous	Vulnerable	0.37834	0.458563	-0.422118	-0.338601	-0.422118	-0.338601	74.4298	0.0304292
11.3657	11.3657	3.82129e-08	Wallagonia_leerii	Siluridae	Siluriformes	potamodromous	Least Concern	11.3657	11.3657	1.0556	1.0556	1.0556	1.0556	15.8801	0.690441
0.212354	0.216326	0.00397283	Wallagonia_micropogon	Siluridae	Siluriformes	NA	NE/DD	0.212354	0.216326	-0.67294	-0.664891	-0.67294	-0.664891	24.2626	0.0125843
0.380937	0.403103	0.0221656	Xenentodon_cancila	Belonidae	Beloniformes	amphidromous	Least Concern	0.38	0.4	-0.420216	-0.39794	-0.420216	-0.39794	62.4894	0.0333455
0.394192	0.443402	0.0492095	Xenentodon_canciloides	Belonidae	Beloniformes	NA	Least Concern	0.394192	0.443402	-0.404292	-0.353202	-0.404292	-0.353202	47.1136	0.0389047
3.93872	3.93872	3.74637e-08	Yarica_hyalosoma	Apogonidae	Kurtiformes	amphidromous	Least Concern	3.94	3.94	0.595496	0.595496	0.595496	0.595496	8.48307	0.176731
0.892619	0.919975	0.0273556	Yasuhikotakia_caudipunctata	Botiidae	Cypriniformes	NA	Least Concern	0.892619	0.919975	-0.0493339	-0.036224	-0.049334	-0.036224	22.1584	0.0774769
0.313565	0.320458	0.00689298	Yasuhikotakia_eos	Botiidae	Cypriniformes	NA	Least Concern	0.313565	0.320458	-0.503672	-0.494229	-0.503672	-0.494229	26.9645	0.0252241
0.711975	0.717572	0.00559715	Yasuhikotakia_lecontei	Botiidae	Cypriniformes	NA	Least Concern	0.711975	0.717572	-0.147535	-0.144135	-0.147535	-0.144135	26.2872	0.0674032
9.95593	9.95593	1.00907e-08	Yasuhikotakia_longidorsalis	Botiidae	Cypriniformes	NA	NE/DD	9.95593	9.95593	0.998082	0.998082	0.998082	0.998082	10.085	1.26062
0.881625	0.897241	0.0156156	Yasuhikotakia_modesta	Botiidae	Cypriniformes	potamodromous	Least Concern	0.881625	0.897241	-0.0547161	-0.0470909	-0.054716	-0.047091	38.6625	0.0842319
0.630274	0.632303	0.00202903	Yasuhikotakia_morleti	Botiidae	Cypriniformes	NA	Least Concern	0.630274	0.632303	-0.200471	-0.199075	-0.200471	-0.199075	20.2131	0.0452194
7.92492	7.92492	2.78176e-08	Yasuhikotakia_splendida	Botiidae	Cypriniformes	NA	Vulnerable	7.92492	7.92492	0.898995	0.898995	0.898995	0.898995	3.82256	0.47782
33.3333	40.4243	7.09096	Zacco_platypus	Xenocyprididae	Cypriniformes	NA	NE/DD	33.3333	40.4243	1.52288	1.60664	1.52288	1.60664	19.7636	0.564676
4.22351	4.22351	3.33346e-08	Zenarchopterus_buffonis	Zenarchopteridae	Beloniformes	NA	Least Concern	4.22351	4.22351	0.625674	0.625674	0.625674	0.625674	15.945	0.279736
7.79329	7.79329	6.84495e-09	Zenarchopterus_clarus	Zenarchopteridae	Beloniformes	NA	Least Concern	7.79329	7.79329	0.891721	0.891721	0.891721	0.891721	11.4291	0.601531
0.198182	0.203956	0.00577425	Zenarchopterus_ectuntio	Zenarchopteridae	Beloniformes	NA	Least Concern	0.198182	0.203956	-0.702936	-0.690464	-0.702936	-0.690464	32.8719	0.0152114
4.82593	4.82593	-9.93501e-09	Zenarchopterus_gilli	Zenarchopteridae	Beloniformes	amphidromous	Least Concern	4.83	4.83	0.683947	0.683947	0.683947	0.683947	16.617	0.33234
21.0268	21.0268	-1.05368e-08	Zenarchopterus_pappenheimi	Zenarchopteridae	Beloniformes	NA	Least Concern	21.0268	21.0268	1.32277	1.32277	1.32277	1.32277	2.27447	2.27447
